# Supplementary material
Source: publisher figshare collection journal article supplement (https://frontiersin.figshare.com/ndownloader/files/15203375)
Supplement: Supplementary file 1 [file 15203375]

& [頁面標題]

曲線下的區域

| 測試結果變數   | 區域圖  | 標準錯誤 <sup>a</sup> | 漸進顯著性 <sup>b</sup> | 漸進 95% 信賴區間 |      |
|----------|------|-------------------|--------------------|-------------|------|
|          |      |                   |                    | 下限          | 上限   |
| TOMM7    | .229 | .030              | .000               | .170        | .288 |
| RPS3A    | .341 | .036              | .000               | .270        | .411 |
| RPS17    | .281 | .034              | .000               | .215        | .348 |
| NDUFB3   | .282 | .034              | .000               | .215        | .349 |
| RPS27    | .299 | .035              | .000               | .231        | .367 |
| LSM3     | .272 | .034              | .000               | .206        | .337 |
| PSMA4    | .268 | .033              | .000               | .204        | .333 |
| RPL17    | .244 | .031              | .000               | .183        | .305 |
| PSMA6    | .327 | .036              | .000               | .256        | .398 |
| DPM1     | .256 | .032              | .000               | .193        | .319 |
| TMEM126B | .318 | .036              | .000               | .249        | .388 |
| MRPL22   | .270 | .034              | .000               | .203        | .337 |
| ATP5J    | .254 | .033              | .000               | .190        | .318 |
| RPL26L1  | .302 | .035              | .000               | .233        | .371 |
| LARP7    | .272 | .033              | .000               | .207        | .337 |

測試結果變數：TOMM7，RPS3A，RPS17，NDUFB3，RPS27，LSM3，PSMA4，RPL17，PSMA6，DPM1，MRPL22，ATP5J 在正數實際狀態與負數實際狀態群組之間至少有一個連結空間。統計資料可能有偏差。

a. 在非參數式假設下

b. 空值假設：true 區域 = 0.5
