# Supplementary material
Source: publisher figshare collection journal article supplement (https://frontiersin.figshare.com/ndownloader/files/15203375)
Supplement: Supplementary file 3 [file 15203375]

曲線下的區域

| 測試結果變數  | 區域圖  | 標準錯誤 <sup>a</sup> | 漸進顯著性 <sup>b</sup> | 漸進 95% 信賴區間 |      |
|---------|------|-------------------|--------------------|-------------|------|
|         |      |                   |                    | 下限          | 上限   |
| ACTR3   | .610 | .040              | .007               | .532        | .688 |
| MTPN    | .613 | .040              | .005               | .535        | .690 |
| ADD3    | .566 | .040              | .103               | .487        | .645 |
| SACM1L  | .619 | .038              | .003               | .544        | .695 |
| WIPF1   | .578 | .039              | .055               | .501        | .655 |
| CMPK1   | .600 | .039              | .014               | .524        | .676 |
| FAM49B  | .582 | .039              | .042               | .505        | .659 |
| PHIP    | .614 | .039              | .005               | .538        | .690 |
| UBLCP   | .634 | .038              | .001               | .559        | .709 |
| STK26   | .642 | .038              | .000               | .567        | .717 |
| LUC7L3  | .586 | .039              | .034               | .509        | .662 |
| ANKRD10 | .596 | .040              | .018               | .518        | .673 |
| GIMAP2  | .640 | .040              | .001               | .562        | .717 |
| ATF4    | .562 | .040              | .129               | .483        | .640 |

測試結果變數：ACTR3，MTPN，ADD3，SACM1L，WIPF1，UBLCP，STK26，GIMAP2，ATF4 在正數實際狀態與負數實際狀態群組之間至少有一個連結空間。統計資料可能有偏差。

a. 在非參數式假設下

b. 空值假設：true 區域 = 0.5
