# Supplementary material
Source: publisher figshare collection journal article supplement (https://frontiersin.figshare.com/ndownloader/files/15203375)
Supplement: Supplementary file 4 [file 15203375]

& [頁面標題]

曲線下的區域

| 測試結果變數  | 區域圖  | 標準錯誤 <sup>a</sup> | 漸進顯著性 <sup>b</sup> | 漸進 95% 信賴區間 |      |
|---------|------|-------------------|--------------------|-------------|------|
|         |      |                   |                    | 下限          | 上限   |
| THAP12  | .405 | .035              | .007               | .337        | .473 |
| ANKRD49 | .396 | .034              | .003               | .329        | .463 |
| RPS6KB1 | .430 | .035              | .045               | .362        | .498 |
| PPM1B   | .420 | .035              | .022               | .352        | .487 |
| PPP2CA  | .505 | .035              | .888               | .436        | .574 |
| CD58    | .403 | .034              | .006               | .336        | .471 |
| CNIH1   | .511 | .035              | .744               | .443        | .580 |
| ARGLU1  | .443 | .035              | .106               | .375        | .512 |
| SNRK    | .425 | .035              | .032               | .357        | .493 |
| UPF2    | .434 | .035              | .060               | .366        | .502 |
| PCNX4   | .469 | .035              | .379               | .401        | .538 |
| ST8SIA4 | .433 | .035              | .057               | .365        | .501 |
| TRIM33  | .494 | .035              | .865               | .425        | .563 |
| BCLAF1  | .450 | .035              | .152               | .381        | .518 |

a. 在非參數式假設下

b. 空值假設：true 區域 = 0.5
