# Supplementary material
Source: publisher figshare collection journal article supplement (https://frontiersin.figshare.com/ndownloader/files/15203375)
Supplement: Supplementary file 10 [file 15203375]

& [頁面標題]

曲線下的區域

| 測試結果變數   | 區域圖  | 標準錯誤 <sup>a</sup> | 漸進顯著性 <sup>b</sup> | 漸進 95% 信賴區間 |      |
|----------|------|-------------------|--------------------|-------------|------|
|          |      |                   |                    | 下限          | 上限   |
| MRPL22   | .349 | .033              | .000               | .285        | .413 |
| TOMM7    | .295 | .031              | .000               | .234        | .356 |
| DPM1     | .355 | .033              | .000               | .290        | .420 |
| RPL26L1  | .402 | .034              | .005               | .335        | .469 |
| NDUFB3   | .365 | .033              | .000               | .300        | .430 |
| RPS3A    | .353 | .033              | .000               | .288        | .417 |
| TMEM126B | .398 | .034              | .004               | .331        | .465 |
| PSMA6    | .373 | .033              | .000               | .308        | .439 |
| RPS27    | .332 | .032              | .000               | .269        | .396 |
| PSMA4    | .355 | .033              | .000               | .290        | .420 |
| RPS17    | .331 | .032              | .000               | .267        | .394 |
| LSM3     | .357 | .033              | .000               | .292        | .422 |
| ATP5J    | .296 | .031              | .000               | .235        | .356 |
| RPL17    | .334 | .032              | .000               | .271        | .398 |
| LARP7    | .353 | .033              | .000               | .289        | .418 |

a. 在非參數式假設下

b. 空值假設：true 區域 = 0.5
