# Supplementary material
Source: publisher figshare collection journal article supplement (https://frontiersin.figshare.com/ndownloader/files/15203375)
Supplement: Supplementary file 12 [file 15203375]

曲線下的區域

| 測試結果變數  | 區域圖  | 標準錯誤 <sup>a</sup> | 漸進顯著性 <sup>b</sup> | 漸進 95% 信賴區間 |      |
|---------|------|-------------------|--------------------|-------------|------|
|         |      |                   |                    | 下限          | 上限   |
| ARGLU1  | .611 | .038              | .006               | .536        | .687 |
| PPM1B   | .584 | .040              | .038               | .506        | .662 |
| THAP12  | .605 | .039              | .009               | .529        | .682 |
| SNRK    | .599 | .040              | .015               | .521        | .677 |
| CD58    | .633 | .039              | .001               | .557        | .708 |
| ANKRD49 | .606 | .039              | .009               | .529        | .683 |
| ST8SIA4 | .628 | .038              | .002               | .553        | .704 |
| RPS6KB1 | .601 | .039              | .012               | .525        | .677 |
| PPP2CA  | .613 | .040              | .005               | .534        | .691 |
| CNIH1   | .637 | .039              | .001               | .560        | .714 |
| BCLAF1  | .604 | .039              | .010               | .527        | .681 |
| PCNX4   | .581 | .039              | .044               | .504        | .659 |
| TRIM33  | .642 | .038              | .000               | .568        | .717 |
| UPF2    | .579 | .040              | .051               | .501        | .657 |

測試結果變數：ARGLU1，PPM1B，THAP12，SNRK，CD58，RPS6KB1，PPP2CA，CNIH1，BCLAF1，PCNX4，TRIM33，UPF2 在正數實際狀態與負數實際狀態群組之間至少有一個連結空間。統計資料可能有偏差。

a. 在非參數式假設下

b. 空值假設：true 區域 = 0.5
