# Supplementary material
Source: publisher figshare collection journal article supplement (https://frontiersin.figshare.com/ndownloader/files/15203375)
Supplement: Supplementary file 16 [file 15203375]

曲線下的區域

測試結果變數： 預測機率

| 區域圖  | 標準錯誤 <sup>a</sup> | 漸進顯著性 <sup>b</sup> | 漸進 95% 信賴區間 |      |
|------|-------------------|--------------------|-------------|------|
|      |                   |                    | 下限          | 上限   |
| .809 | .031              | .000               | .747        | .870 |

- a. 在非參數式假設下
- b. 空值假設：true 區域 = 0.5
