# Supplementary material
Source: publisher figshare collection journal article supplement (https://frontiersin.figshare.com/ndownloader/files/15203375)
Supplement: Supplementary file 34 [file 15203375]

& [頁面標題]

曲線下的區域

| 測試結果變數  | 區域圖  | 標準錯誤 <sup>a</sup> | 漸進顯著性 <sup>b</sup> | 漸進 95% 信賴區間 |      |
|---------|------|-------------------|--------------------|-------------|------|
|         |      |                   |                    | 下限          | 上限   |
| MANSC1  | .510 | .037              | .780               | .437        | .583 |
| PFKFB4  | .616 | .036              | .002               | .546        | .686 |
| REPS2   | .590 | .037              | .015               | .519        | .662 |
| LAMP2   | .564 | .037              | .085               | .492        | .637 |
| RNF149  | .531 | .037              | .413               | .457        | .604 |
| SVIL    | .550 | .037              | .179               | .478        | .623 |
| ZNF746  | .544 | .037              | .240               | .471        | .616 |
| FCGR2A  | .528 | .037              | .461               | .454        | .601 |
| MSRB1   | .538 | .037              | .313               | .465        | .610 |
| DENND5A | .548 | .037              | .202               | .474        | .621 |
| P6V1B2  | .561 | .037              | .101               | .489        | .633 |
| MXD1    | .553 | .037              | .158               | .480        | .625 |
| SIRPA   | .590 | .036              | .016               | .518        | .661 |
| FPR2    | .555 | .037              | .139               | .483        | .627 |
| NDEL1   | .561 | .037              | .101               | .488        | .634 |

a. 在非參數式假設下

b. 空值假設：true 區域 = 0.5
