# Supplementary material
Source: publisher figshare collection journal article supplement (https://frontiersin.figshare.com/ndownloader/files/15203375)
Supplement: Supplementary file 35 [file 15203375]

曲線下的區域

| 測試結果變數   | 區域圖  | 標準錯誤 <sup>a</sup> | 漸進顯著性 <sup>b</sup> | 漸進 95% 信賴區間 |      |
|----------|------|-------------------|--------------------|-------------|------|
|          |      |                   |                    | 下限          | 上限   |
| MRPL22   | .486 | .037              | .707               | .414        | .558 |
| TOMM7    | .434 | .037              | .073               | .362        | .505 |
| DPM1     | .486 | .037              | .714               | .414        | .559 |
| RPL26L1  | .473 | .037              | .462               | .400        | .545 |
| NDUFB3   | .483 | .037              | .647               | .410        | .556 |
| RPS3A    | .446 | .037              | .145               | .374        | .518 |
| TMEM126B | .517 | .037              | .651               | .444        | .589 |
| PSMA6    | .472 | .037              | .451               | .399        | .545 |
| RPS27    | .472 | .037              | .453               | .400        | .544 |
| PSMA4    | .446 | .037              | .146               | .374        | .519 |
| RPS17    | .469 | .037              | .406               | .397        | .541 |
| LSM3     | .449 | .037              | .168               | .377        | .521 |
| ATP5J    | .443 | .037              | .124               | .371        | .515 |
| RPL17    | .462 | .037              | .298               | .389        | .534 |
| LARP7    | .471 | .037              | .440               | .399        | .544 |

測試結果變數：RPL17 在正數實際狀態與負數實際狀態群組之間至少有一個連結空間。統計資料可能有偏差。

a. 在非參數式假設下

b. 空值假設：true 區域 = 0.5
