# Supplementary material
Source: publisher figshare collection journal article supplement (https://frontiersin.figshare.com/ndownloader/files/15203375)
Supplement: Supplementary file 36 [file 15203375]

& [頁面標題]

曲線下的區域

| 測試結果變數  | 區域圖  | 標準錯誤 <sup>a</sup> | 漸進顯著性 <sup>b</sup> | 漸進 95% 信賴區間 |      |
|---------|------|-------------------|--------------------|-------------|------|
|         |      |                   |                    | 下限          | 上限   |
| ACTR3   | .458 | .035              | .230               | .390        | .526 |
| GIMAP2  | .393 | .034              | .002               | .327        | .460 |
| ANKRD10 | .490 | .035              | .768               | .421        | .558 |
| LUC7L3  | .466 | .035              | .334               | .397        | .535 |
| SACM1L  | .467 | .035              | .351               | .399        | .536 |
| ADD3    | .486 | .035              | .681               | .417        | .554 |
| PHIP    | .456 | .035              | .212               | .387        | .525 |
| CMPK1   | .408 | .034              | .008               | .340        | .475 |
| FAM49B  | .476 | .035              | .486               | .407        | .544 |
| MTPN    | .511 | .035              | .743               | .443        | .580 |
| UBLCP   | .433 | .035              | .055               | .365        | .501 |
| STK26   | .452 | .035              | .168               | .383        | .520 |
| WIPF1   | .571 | .035              | .042               | .504        | .639 |
| ATF4    | .479 | .035              | .548               | .410        | .548 |

a. 在非參數式假設下

b. 空值假設：true 區域 = 0.5
