# Supplementary material
Source: publisher figshare collection journal article supplement (https://frontiersin.figshare.com/ndownloader/files/15203375)
Supplement: Supplementary file 45 [file 15203375]

& [頁面標題]

曲線下的區域

| 測試結果變數  | 區域圖  | 標準錯誤 <sup>a</sup> | 漸進顯著性 <sup>b</sup> | 漸進 95% 信賴區間 |      |
|---------|------|-------------------|--------------------|-------------|------|
|         |      |                   |                    | 下限          | 上限   |
| REEP5   | .347 | .036              | .000               | .276        | .418 |
| CEBPZ   | .285 | .033              | .000               | .220        | .350 |
| CRBN    | .319 | .034              | .000               | .251        | .386 |
| RDH14   | .303 | .034              | .000               | .236        | .369 |
| HSPA8   | .291 | .033              | .000               | .227        | .355 |
| G6PD    | .660 | .035              | .000               | .592        | .728 |
| STAT3   | .654 | .035              | .000               | .585        | .723 |
| USP16   | .298 | .034              | .000               | .232        | .364 |
| DENR    | .279 | .033              | .000               | .214        | .345 |
| GBA     | .692 | .034              | .000               | .625        | .758 |
| MITD1   | .228 | .031              | .000               | .167        | .288 |
| PRRC2A  | .650 | .035              | .000               | .581        | .719 |
| ACADM   | .302 | .034              | .000               | .236        | .369 |
| COMMD10 | .331 | .035              | .000               | .263        | .400 |
| DTX2    | .651 | .036              | .000               | .581        | .720 |

測試結果變數：REEP5，CEBPZ，CRBN，RDH14，HSPA8，G6PD，STAT3，USP16，DENR，GBA，MITD1，PRRC2A，ACADM，COMMD10，DTX2 在正數實際狀態與負數實際狀態群組之間至少有一個連結空間。統計資料可能有偏差。

a. 在非參數式假設下

b. 空值假設：true 區域 = 0.5
