# Supplementary material
Source: publisher figshare collection journal article supplement (https://frontiersin.figshare.com/ndownloader/files/15203375)
Supplement: Supplementary file 46 [file 15203375]

& [頁面標題]

曲線下的區域

| 測試結果變數  | 區域圖  | 標準錯誤 <sup>a</sup> | 漸進顯著性 <sup>b</sup> | 漸進 95% 信賴區間 |      |
|---------|------|-------------------|--------------------|-------------|------|
|         |      |                   |                    | 下限          | 上限   |
| FPR2    | .646 | .036              | .000               | .576        | .715 |
| REPS2   | .591 | .036              | .015               | .519        | .662 |
| MXD1    | .574 | .036              | .047               | .503        | .646 |
| PFKFB4  | .667 | .035              | .000               | .599        | .735 |
| MANSC1  | .590 | .037              | .016               | .518        | .662 |
| LAMP2   | .615 | .036              | .002               | .544        | .685 |
| RNF149  | .544 | .037              | .237               | .472        | .617 |
| MSRB1   | .602 | .036              | .006               | .531        | .673 |
| FCGR2A  | .541 | .037              | .274               | .468        | .613 |
| SVIL    | .582 | .037              | .029               | .510        | .653 |
| ZNF746  | .665 | .035              | .000               | .597        | .733 |
| SIRPA   | .618 | .036              | .002               | .547        | .688 |
| DENND5A | .588 | .036              | .019               | .516        | .659 |
| P6V1B2  | .530 | .037              | .420               | .457        | .604 |
| NDEL1   | .561 | .037              | .104               | .489        | .632 |

測試結果變數：FPR2, REPS2, MXD1, PFKFB4, MANSC1, LAMP2, RNF149, MSRB1, FCGR2A, SVIL, ZNF746, SIRPA, DENND5A, P6V1B2, NDEL1 在正數實際狀態與負數實際狀態群組之間至少有一個連結空間。統計資料可能有偏差。

a. 在非參數式假設下

b. 空值假設：true 區域 = 0.5
