# Supplementary material
Source: publisher figshare collection journal article supplement (https://frontiersin.figshare.com/ndownloader/files/15203375)
Supplement: Supplementary file 49 [file 15203375]

曲線下的區域

| 測試結果變數 | 區域圖  | 標準錯誤 <sup>a</sup> | 漸進顯著性 <sup>b</sup> | 漸進 95% 信賴區間 |      |
|--------|------|-------------------|--------------------|-------------|------|
|        |      |                   |                    | 下限          | 上限   |
| SRGN   | .258 | .036              | .000               | .188        | .328 |
| WDR6   | .735 | .037              | .000               | .663        | .806 |
| ECH1   | .711 | .038              | .000               | .637        | .786 |
| CXXC1  | .762 | .035              | .000               | .692        | .831 |
| JADE2  | .694 | .039              | .000               | .617        | .770 |
| TRPV2  | .744 | .036              | .000               | .674        | .814 |
| PUF60  | .704 | .039              | .000               | .628        | .780 |
| SBF1   | .794 | .033              | .000               | .730        | .858 |
| SRRT   | .699 | .038              | .000               | .625        | .773 |
| NDUFV1 | .736 | .037              | .000               | .664        | .808 |
| SCAMP3 | .705 | .039              | .000               | .628        | .782 |
| DDX56  | .734 | .036              | .000               | .663        | .805 |
| GPS1   | .751 | .035              | .000               | .682        | .820 |
| TNPO2  | .755 | .035              | .000               | .686        | .824 |

測試結果變數：SRGN，WDR6，ECH1，CXXC1，JADE2，TRPV2，PUF60，SBF1，SRRT，NDUFV1，SCAMP3，DDX56，GPS1，TNPO2 在正數實際狀態與負數實際狀態群組之間至少有一個連結空間。統計資料可能有偏差。

a. 在非參數式假設下

b. 空值假設：true 區域 = 0.5
