# Supplementary material
Source: publisher figshare collection journal article supplement (https://frontiersin.figshare.com/ndownloader/files/15203375)
Supplement: Supplementary file 55 [file 15203375]

& [頁面標題]

曲線下的區域

| 測試結果變數 | 區域圖  | 標準錯誤 <sup>a</sup> | 漸進顯著性 <sup>b</sup> | 漸進 95% 信賴區間 |      |
|--------|------|-------------------|--------------------|-------------|------|
|        |      |                   |                    | 下限          | 上限   |
| ECH1   | .547 | .035              | .180               | .479        | .615 |
| TNP02  | .584 | .035              | .016               | .517        | .652 |
| WDR6   | .579 | .034              | .023               | .512        | .647 |
| DDX56  | .531 | .035              | .379               | .462        | .600 |
| CXXC1  | .549 | .035              | .161               | .481        | .618 |
| SBF1   | .616 | .034              | .001               | .549        | .683 |
| PUF60  | .541 | .035              | .236               | .473        | .610 |
| NDUFV1 | .555 | .035              | .116               | .487        | .623 |
| SCAMP3 | .567 | .035              | .055               | .499        | .635 |
| JADE2  | .493 | .035              | .831               | .424        | .561 |
| GPS1   | .598 | .035              | .005               | .530        | .666 |
| TRPV2  | .586 | .034              | .014               | .519        | .654 |
| SRGN   | .421 | .034              | .023               | .353        | .488 |
| SRRT   | .618 | .034              | .001               | .552        | .684 |

a. 在非參數式假設下

b. 空值假設：true 區域 = 0.5
