# Supplementary material
Source: publisher figshare collection journal article supplement (https://frontiersin.figshare.com/ndownloader/files/15203375)
Supplement: Supplementary file 58 [file 15203375]

& [頁面標題]

曲線下的區域

| 測試結果變數  | 區域圖  | 標準錯誤 <sup>a</sup> | 漸進顯著性 <sup>b</sup> | 漸進 95% 信賴區間 |      |
|---------|------|-------------------|--------------------|-------------|------|
|         |      |                   |                    | 下限          | 上限   |
| MANSC1  | .539 | .037              | .294               | .467        | .611 |
| PFKFB4  | .570 | .036              | .060               | .498        | .641 |
| REPS2   | .543 | .036              | .243               | .472        | .615 |
| LAMP2   | .555 | .036              | .137               | .484        | .627 |
| RNF149  | .571 | .036              | .055               | .500        | .643 |
| SVIL    | .557 | .037              | .123               | .485        | .629 |
| ZNF746  | .540 | .036              | .284               | .468        | .611 |
| FCGR2A  | .508 | .037              | .837               | .436        | .579 |
| MSRB1   | .577 | .036              | .037               | .506        | .648 |
| DENND5A | .565 | .036              | .077               | .494        | .636 |
| P6V1B2  | .526 | .037              | .477               | .455        | .598 |
| MXD1    | .586 | .036              | .020               | .515        | .657 |
| SIRPA   | .539 | .037              | .293               | .467        | .611 |
| FPR2    | .518 | .037              | .623               | .446        | .590 |
| NDEL1   | .524 | .037              | .509               | .453        | .596 |

a. 在非參數式假設下

b. 空值假設：true 區域 = 0.5
