# Supplementary material
Source: publisher figshare collection journal article supplement (https://frontiersin.figshare.com/ndownloader/files/15203375)
Supplement: Supplementary file 60 [file 15203375]

曲線下的區域

| 測試結果變數 | 區域圖  | 標準錯誤 <sup>a</sup> | 漸進顯著性 <sup>b</sup> | 漸進 95% 信賴區間 |      |
|--------|------|-------------------|--------------------|-------------|------|
|        |      |                   |                    | 下限          | 上限   |
| CLNS1A | .259 | .037              | .000               | .186        | .333 |
| CRBN   | .338 | .041              | .000               | .257        | .418 |
| NDUFB5 | .288 | .039              | .000               | .212        | .365 |
| RALA   | .269 | .038              | .000               | .195        | .343 |
| CAMLG  | .354 | .041              | .001               | .273        | .435 |
| DDX1   | .241 | .035              | .000               | .172        | .310 |
| PPP3CB | .317 | .040              | .000               | .240        | .395 |
| EBAG9  | .262 | .037              | .000               | .190        | .334 |
| SNRPF  | .320 | .040              | .000               | .242        | .397 |
| GPN1   | .339 | .040              | .000               | .261        | .418 |
| AK3    | .330 | .040              | .000               | .251        | .409 |
| CCDC25 | .330 | .040              | .000               | .252        | .408 |
| MTERF3 | .294 | .039              | .000               | .217        | .370 |
| PDCD2  | .351 | .041              | .001               | .271        | .431 |

測試結果變數：CLNS1A，CRBN，NDUFB5，RALA，CAMLG，DDX1，PPP3CB，EBAG9，SNRPF，GPN1，AK3，CCDC25，MTERF3，PDCD2 在正數實際狀態與負數實際狀態群組之間至少有一個連結空間。統計資料可能有偏差。

a. 在非參數式假設下

b. 空值假設：true 區域 = 0.5
