# Supplementary material
Source: publisher figshare collection journal article supplement (https://frontiersin.figshare.com/ndownloader/files/15203375)
Supplement: Supplementary file 61 [file 15203375]

曲線下的區域

| 測試結果變數   | 區域圖  | 標準錯誤 <sup>a</sup> | 漸進顯著性 <sup>b</sup> | 漸進 95% 信賴區間 |      |
|----------|------|-------------------|--------------------|-------------|------|
|          |      |                   |                    | 下限          | 上限   |
| MRPL22   | .358 | .035              | .000               | .289        | .427 |
| TOMM7    | .357 | .035              | .000               | .288        | .426 |
| DPM1     | .366 | .035              | .000               | .297        | .436 |
| RPL26L1  | .427 | .036              | .050               | .355        | .498 |
| NDUFB3   | .383 | .036              | .002               | .313        | .453 |
| RPS3A    | .400 | .036              | .007               | .328        | .471 |
| TMEM126B | .383 | .036              | .002               | .312        | .453 |
| PSMA6    | .402 | .036              | .008               | .331        | .473 |
| RPS27    | .359 | .035              | .000               | .290        | .427 |
| PSMA4    | .406 | .036              | .012               | .335        | .478 |
| RPS17    | .353 | .035              | .000               | .284        | .421 |
| LSM3     | .399 | .036              | .007               | .328        | .469 |
| ATP5J    | .346 | .035              | .000               | .278        | .414 |
| RPL17    | .365 | .035              | .000               | .295        | .434 |
| LARP7    | .382 | .036              | .002               | .312        | .452 |

測試結果變數：RPS27 在正數實際狀態與負數實際狀態群組之間至少有一個連結空間。統計資料可能有偏差。

a. 在非參數式假設下

b. 空值假設：true 區域 = 0.5
