# Supplementary material
Source: publisher figshare collection journal article supplement (https://frontiersin.figshare.com/ndownloader/files/15203375)
Supplement: Supplementary file 68 [file 15203375]

& [頁面標題]

曲線下的區域

| 測試結果變數  | 區域圖  | 標準錯誤 <sup>a</sup> | 漸進顯著性 <sup>b</sup> | 漸進 95% 信賴區間 |      |
|---------|------|-------------------|--------------------|-------------|------|
|         |      |                   |                    | 下限          | 上限   |
| ACTR3   | .538 | .037              | .303               | .466        | .611 |
| GIMAP2  | .464 | .037              | .334               | .392        | .536 |
| ANKRD10 | .513 | .037              | .727               | .441        | .585 |
| LUC7L3  | .548 | .037              | .192               | .477        | .620 |
| SACM1L  | .530 | .037              | .422               | .458        | .602 |
| ADD3    | .506 | .037              | .880               | .434        | .578 |
| PHIP    | .513 | .037              | .725               | .441        | .585 |
| CMPK1   | .498 | .037              | .954               | .425        | .570 |
| FAM49B  | .514 | .037              | .695               | .442        | .587 |
| MTPN    | .526 | .037              | .484               | .453        | .599 |
| UBLCP   | .536 | .037              | .325               | .464        | .608 |
| STK26   | .524 | .037              | .524               | .452        | .596 |
| WIPF1   | .523 | .037              | .539               | .451        | .595 |
| ATF4    | .487 | .038              | .731               | .414        | .561 |

a. 在非參數式假設下

b. 空值假設：true 區域 = 0.5
