# Supplementary material
Source: publisher figshare collection journal article supplement (https://frontiersin.figshare.com/ndownloader/files/15203375)
Supplement: Supplementary file 71 [file 15203375]

& [頁面標題]

曲線下的區域

| 測試結果變數    | 區域圖  | 標準錯誤 <sup>a</sup> | 漸進顯著性 <sup>b</sup> | 漸進 95% 信賴區間 |      |
|-----------|------|-------------------|--------------------|-------------|------|
|           |      |                   |                    | 下限          | 上限   |
| MITD1     | .490 | .037              | .782               | .417        | .562 |
| DTX2      | .515 | .037              | .684               | .442        | .588 |
| CEBPZ     | .484 | .037              | .661               | .412        | .556 |
| G B A     | .453 | .037              | .206               | .381        | .525 |
| REEP5     | .562 | .037              | .095               | .490        | .634 |
| PRRC2 A   | .492 | .037              | .819               | .419        | .564 |
| DENR      | .512 | .037              | .752               | .439        | .584 |
| A C A D M | .476 | .037              | .521               | .404        | .548 |
| COMMD10   | .497 | .037              | .932               | .425        | .569 |
| RDH14     | .482 | .037              | .629               | .410        | .555 |
| CRBN      | .504 | .037              | .918               | .431        | .576 |
| G6PD      | .491 | .037              | .802               | .419        | .563 |
| USP16     | .487 | .037              | .730               | .415        | .559 |
| STAT3     | .519 | .037              | .612               | .447        | .591 |
| HSPA8     | .474 | .037              | .479               | .402        | .546 |

a. 在非參數式假設下

b. 空值假設：true 區域 = 0.5
