# Supplementary material
Source: publisher figshare collection journal article supplement (https://frontiersin.figshare.com/ndownloader/files/15203375)
Supplement: Supplementary file 72 [file 15203375]

& [頁面標題]

曲線下的區域

| 測試結果變數  | 區域圖  | 標準錯誤 <sup>a</sup> | 漸進顯著性 <sup>b</sup> | 漸進 95% 信賴區間 |      |
|---------|------|-------------------|--------------------|-------------|------|
|         |      |                   |                    | 下限          | 上限   |
| FPR2    | .595 | .042              | .027               | .512        | .678 |
| REPS2   | .579 | .043              | .067               | .495        | .662 |
| MXD1    | .445 | .044              | .205               | .359        | .532 |
| PFKFB4  | .633 | .041              | .002               | .553        | .713 |
| MANSC1  | .560 | .043              | .165               | .476        | .644 |
| LAMP2   | .532 | .044              | .462               | .446        | .617 |
| RNF149  | .440 | .044              | .163               | .354        | .526 |
| MSRB1   | .506 | .043              | .890               | .421        | .591 |
| FCGR2A  | .512 | .044              | .773               | .427        | .598 |
| SVIL    | .523 | .045              | .601               | .435        | .610 |
| ZNF746  | .645 | .041              | .001               | .564        | .726 |
| SIRPA   | .641 | .041              | .001               | .560        | .721 |
| DENND5A | .501 | .044              | .986               | .415        | .586 |
| P6V1B2  | .501 | .044              | .987               | .414        | .587 |
| NDEL1   | .525 | .044              | .556               | .439        | .611 |

測試結果變數：FPR2, REPS2, MXD1, PFKFB4, MANSC1, LAMP2, RNF149, MSRB1, FCGR2A, SVIL, ZNF746, SIRPA, DENND5A, P6V1B2, NDEL1 在正數實際狀態與負數實際狀態群組之間至少有一個連結空間。統計資料可能有偏差。

a. 在非參數式假設下

b. 空值假設：true 區域 = 0.5
