# Supplementary material
Source: publisher figshare collection journal article supplement (https://frontiersin.figshare.com/ndownloader/files/15203375)
Supplement: Supplementary file 75 [file 15203375]

& [頁面標題]

曲線下的區域

| 測試結果變數  | 區域圖  | 標準錯誤 <sup>a</sup> | 漸進顯著性 <sup>b</sup> | 漸進 95% 信賴區間 |      |
|---------|------|-------------------|--------------------|-------------|------|
|         |      |                   |                    | 下限          | 上限   |
| MANSC1  | .547 | .035              | .184               | .478        | .615 |
| PFKFB4  | .649 | .033              | .000               | .584        | .715 |
| REPS2   | .607 | .034              | .002               | .540        | .675 |
| LAMP2   | .615 | .034              | .001               | .548        | .681 |
| RNF149  | .599 | .034              | .005               | .532        | .666 |
| SVIL    | .599 | .034              | .005               | .532        | .666 |
| ZNF746  | .577 | .035              | .029               | .508        | .645 |
| FCGR2A  | .528 | .035              | .429               | .459        | .597 |
| MSRB1   | .597 | .035              | .005               | .530        | .665 |
| DENND5A | .602 | .034              | .003               | .535        | .670 |
| P6V1B2  | .582 | .034              | .019               | .514        | .650 |
| MXD1    | .624 | .034              | .000               | .558        | .691 |
| SIRPA   | .613 | .034              | .001               | .546        | .679 |
| FPR2    | .567 | .035              | .055               | .499        | .635 |
| NDEL1   | .572 | .035              | .039               | .504        | .641 |

a. 在非參數式假設下

b. 空值假設：true 區域 = 0.5
