# Supplementary material
Source: publisher figshare collection journal article supplement (https://frontiersin.figshare.com/ndownloader/files/15203375)
Supplement: Supplementary file 82 [file 15203375]

曲線下的區域

| 測試結果變數 | 區域圖  | 標準錯誤 <sup>a</sup> | 漸進顯著性 <sup>b</sup> | 漸進 95% 信賴區間 |      |
|--------|------|-------------------|--------------------|-------------|------|
|        |      |                   |                    | 下限          | 上限   |
| CRBN   | .480 | .037              | .587               | .408        | .552 |
| CAMLG  | .546 | .037              | .212               | .475        | .618 |
| CLNS1A | .506 | .037              | .862               | .434        | .578 |
| RALA   | .525 | .037              | .499               | .453        | .597 |
| GPN1   | .480 | .037              | .582               | .408        | .551 |
| AK3    | .540 | .037              | .285               | .468        | .611 |
| MTERF3 | .520 | .037              | .594               | .448        | .592 |
| CCDC25 | .510 | .037              | .786               | .438        | .582 |
| EBAG9  | .510 | .037              | .790               | .438        | .582 |
| PDCD2  | .568 | .036              | .066               | .497        | .639 |
| PPP3CB | .551 | .036              | .167               | .480        | .623 |
| NDUFB5 | .569 | .037              | .062               | .497        | .641 |
| SNRPF  | .536 | .037              | .331               | .464        | .608 |
| DDX1   | .464 | .037              | .337               | .392        | .537 |

a. 在非參數式假設下  
b. 空值假設：true 區域 = 0.5
