# Supplementary material
Source: publisher figshare collection journal article supplement (https://frontiersin.figshare.com/ndownloader/files/15203375)
Supplement: Supplementary file 85 [file 15203375]

曲線下的區域

| 測試結果變數  | 區域圖  | 標準錯誤 <sup>a</sup> | 漸進顯著性 <sup>b</sup> | 漸進 95% 信賴區間 |      |
|---------|------|-------------------|--------------------|-------------|------|
|         |      |                   |                    | 下限          | 上限   |
| ARGLU1  | .252 | .037              | .000               | .179        | .325 |
| PPM1B   | .244 | .036              | .000               | .174        | .313 |
| THAP12  | .296 | .040              | .000               | .219        | .374 |
| SNRK    | .293 | .038              | .000               | .218        | .368 |
| CD58    | .247 | .036              | .000               | .177        | .318 |
| ANKRD49 | .239 | .037              | .000               | .166        | .312 |
| ST8SIA4 | .280 | .038              | .000               | .206        | .354 |
| RPS6KB1 | .254 | .037              | .000               | .182        | .327 |
| PPP2CA  | .298 | .039              | .000               | .221        | .375 |
| CNIH1   | .455 | .043              | .301               | .372        | .539 |
| BCLAF1  | .317 | .040              | .000               | .238        | .396 |
| PCNX4   | .297 | .039              | .000               | .220        | .374 |
| TRIM33  | .329 | .040              | .000               | .251        | .407 |
| UPF2    | .324 | .040              | .000               | .246        | .401 |

測試結果變數：ARGLU1，PPM1B，THAP12，SNRK，CD58，ANKRD49，PPP2CA，CNIH1，BCLAF1，PCNX4，TRIM33，UPF2 在正數實際狀態與負數實際狀態群組之間至少有一個連結空間。統計資料可能有偏差。

a. 在非參數式假設下

b. 空值假設：true 區域 = 0.5
