# Supplementary material
Source: publisher figshare collection journal article supplement (https://frontiersin.figshare.com/ndownloader/files/15203375)
Supplement: Supplementary file 88 [file 15203375]

曲線下的區域

| 測試結果變數 | 區域圖  | 標準錯誤 <sup>a</sup> | 漸進顯著性 <sup>b</sup> | 漸進 95% 信賴區間 |      |
|--------|------|-------------------|--------------------|-------------|------|
|        |      |                   |                    | 下限          | 上限   |
| CRBN   | .392 | .034              | .002               | .325        | .459 |
| CAMLG  | .431 | .035              | .049               | .363        | .499 |
| CLNS1A | .364 | .034              | .000               | .298        | .430 |
| RALA   | .400 | .034              | .004               | .333        | .468 |
| GPN1   | .351 | .033              | .000               | .286        | .417 |
| AK3    | .408 | .034              | .008               | .341        | .475 |
| MTERF3 | .418 | .035              | .020               | .351        | .486 |
| CCDC25 | .385 | .034              | .001               | .318        | .452 |
| EBAG9  | .350 | .033              | .000               | .285        | .415 |
| PDCD2  | .419 | .035              | .020               | .350        | .487 |
| PPP3CB | .426 | .035              | .034               | .358        | .494 |
| NDUFB5 | .423 | .035              | .029               | .356        | .491 |
| SNRPF  | .387 | .034              | .001               | .320        | .454 |
| DDX1   | .359 | .033              | .000               | .294        | .425 |

a. 在非參數式假設下  
b. 空值假設：true 區域 = 0.5
