# Supplementary material
Source: publisher figshare collection journal article supplement (https://frontiersin.figshare.com/ndownloader/files/15203375)
Supplement: Supplementary file 91 [file 15203375]

& [頁面標題]

曲線下的區域

| 測試結果變數  | 區域圖  | 標準錯誤 <sup>a</sup> | 漸進顯著性 <sup>b</sup> | 漸進 95% 信賴區間 |      |
|---------|------|-------------------|--------------------|-------------|------|
|         |      |                   |                    | 下限          | 上限   |
| MITD1   | .375 | .036              | .001               | .305        | .445 |
| DTX2    | .536 | .037              | .338               | .462        | .609 |
| CEBPZ   | .372 | .036              | .001               | .302        | .442 |
| GBA     | .633 | .036              | .000               | .562        | .703 |
| REEP5   | .365 | .036              | .000               | .295        | .435 |
| PRRC2A  | .613 | .036              | .002               | .542        | .684 |
| DENR    | .352 | .035              | .000               | .283        | .421 |
| ACADM   | .343 | .035              | .000               | .274        | .411 |
| COMMD10 | .419 | .037              | .030               | .347        | .491 |
| RDH14   | .381 | .036              | .001               | .311        | .452 |
| CRBN    | .385 | .036              | .002               | .314        | .456 |
| G6PD    | .670 | .035              | .000               | .603        | .738 |
| USP16   | .404 | .036              | .010               | .332        | .475 |
| STAT3   | .614 | .037              | .002               | .542        | .686 |
| HSPA8   | .413 | .037              | .020               | .341        | .485 |

a. 在非參數式假設下

b. 空值假設：true 區域 = 0.5
