# Supplementary material
Source: publisher figshare collection journal article supplement (https://frontiersin.figshare.com/ndownloader/files/15203375)
Supplement: Supplementary file 99 [file 15203375]

曲線下的區域

| 測試結果變數   | 區域圖  | 標準錯誤 <sup>a</sup> | 漸進顯著性 <sup>b</sup> | 漸進 95% 信賴區間 |      |
|----------|------|-------------------|--------------------|-------------|------|
|          |      |                   |                    | 下限          | 上限   |
| TOMM7    | .536 | .040              | .373               | .457        | .615 |
| RPS3A    | .586 | .040              | .035               | .507        | .664 |
| RPS17    | .566 | .040              | .103               | .488        | .645 |
| NDUFB3   | .603 | .040              | .011               | .525        | .681 |
| RPS27    | .568 | .040              | .092               | .490        | .646 |
| LSM3     | .579 | .040              | .051               | .500        | .658 |
| PSMA4    | .566 | .041              | .101               | .487        | .646 |
| RPL17    | .495 | .040              | .896               | .416        | .574 |
| PSMA6    | .626 | .039              | .002               | .549        | .702 |
| DPM1     | .593 | .040              | .021               | .515        | .671 |
| TMEM126B | .607 | .039              | .008               | .530        | .683 |
| MRPL22   | .540 | .040              | .328               | .461        | .619 |
| ATP5J    | .508 | .041              | .837               | .427        | .589 |
| RPL26L1  | .576 | .040              | .059               | .498        | .655 |
| LARP7    | .547 | .041              | .243               | .467        | .627 |

測試結果變數: TOMM7, RPS3A, RPS17, RPS27, PSMA4, RPL17, PSMA6, DPM1, MRPL22, RPL26L1, LARP7 在正數實際狀態與負數實際狀態群組之間至少有一個連結空間。統計資料可能有偏差。

a. 在非參數式假設下

b. 空值假設: true 區域 = 0.5
