# Supplementary material
Source: publisher figshare collection journal article supplement (https://frontiersin.figshare.com/ndownloader/files/15203375)
Supplement: Supplementary file 101 [file 15203375]

曲線下的區域

| 測試結果變數 | 區域圖  | 標準錯誤 <sup>a</sup> | 漸進顯著性 <sup>b</sup> | 漸進 95% 信賴區間 |      |
|--------|------|-------------------|--------------------|-------------|------|
|        |      |                   |                    | 下限          | 上限   |
| CLNS1A | .311 | .035              | .000               | .243        | .379 |
| CRBN   | .392 | .036              | .004               | .321        | .463 |
| NDUFB5 | .347 | .036              | .000               | .278        | .417 |
| RALA   | .322 | .035              | .000               | .253        | .390 |
| CAMLG  | .395 | .036              | .005               | .324        | .467 |
| DDX1   | .272 | .033              | .000               | .207        | .336 |
| PPP3CB | .381 | .036              | .001               | .310        | .452 |
| EBAG9  | .311 | .034              | .000               | .243        | .378 |
| SNRPF  | .354 | .036              | .000               | .285        | .424 |
| GPN1   | .313 | .034              | .000               | .245        | .380 |
| AK3    | .344 | .035              | .000               | .274        | .413 |
| CCDC25 | .364 | .036              | .000               | .293        | .434 |
| MTERF3 | .309 | .034              | .000               | .242        | .377 |
| PDCD2  | .385 | .037              | .002               | .313        | .457 |

測試結果變數：CLNS1A，CRBN，NDUFB5，RALA，CAMLG，DDX1，PPP3CB，EBAG9，SNRPF，GPN1，AK3，CCDC25，MTERF3，PDCD2 在正數實際狀態與負數實際狀態群組之間至少有一個連結空間。統計資料可能有偏差。

a. 在非參數式假設下

b. 空值假設：true 區域 = 0.5
