# Supplementary material
Source: publisher figshare collection journal article supplement (https://frontiersin.figshare.com/ndownloader/files/15203375)
Supplement: Supplementary file 103 [file 15203375]

曲線下的區域

| 測試結果變數 | 區域圖  | 標準錯誤 <sup>a</sup> | 漸進顯著性 <sup>b</sup> | 漸進 95% 信賴區間 |      |
|--------|------|-------------------|--------------------|-------------|------|
|        |      |                   |                    | 下限          | 上限   |
| SRGN   | .656 | .038              | .000               | .582        | .731 |
| WDR6   | .414 | .039              | .034               | .337        | .491 |
| ECH1   | .397 | .039              | .011               | .321        | .473 |
| CXXC1  | .342 | .038              | .000               | .267        | .417 |
| JADE2  | .332 | .038              | .000               | .257        | .406 |
| TRPV2  | .367 | .039              | .001               | .291        | .443 |
| PUF60  | .370 | .038              | .001               | .295        | .446 |
| SBF1   | .390 | .039              | .006               | .313        | .466 |
| SRRT   | .428 | .039              | .077               | .351        | .506 |
| NDUFV1 | .339 | .038              | .000               | .265        | .412 |
| SCAMP3 | .351 | .038              | .000               | .275        | .426 |
| DDX56  | .354 | .038              | .000               | .280        | .429 |
| GPS1   | .342 | .037              | .000               | .269        | .416 |
| TNPO2  | .364 | .038              | .001               | .290        | .439 |

測試結果變數：SRGN，WDR6，ECH1，CXXC1，JADE2，TRPV2，PUF60，SBF1，SRRT，NDUFV1，SCAMP3，DDX56，GPS1，TNPO2 在正數實際狀態與負數實際狀態群組之間至少有一個連結空間。統計資料可能有偏差。

a. 在非參數式假設下

b. 空值假設：true 區域 = 0.5
