# Supplementary material
Source: publisher figshare collection journal article supplement (https://frontiersin.figshare.com/ndownloader/files/15203375)
Supplement: Supplementary file 105 [file 15203375]

& [頁面標題]

曲線下的區域

| 測試結果變數    | 區域圖  | 標準錯誤 <sup>a</sup> | 漸進顯著性 <sup>b</sup> | 漸進 95% 信賴區間 |      |
|-----------|------|-------------------|--------------------|-------------|------|
|           |      |                   |                    | 下限          | 上限   |
| MITD1     | .376 | .034              | .000               | .309        | .442 |
| DTX2      | .555 | .035              | .119               | .486        | .623 |
| CEBPZ     | .366 | .033              | .000               | .300        | .431 |
| G B A     | .576 | .035              | .029               | .509        | .644 |
| REEP5     | .422 | .035              | .026               | .355        | .490 |
| PRRC2 A   | .604 | .034              | .003               | .537        | .671 |
| DENR      | .366 | .034              | .000               | .300        | .431 |
| A C A D M | .335 | .033              | .000               | .272        | .399 |
| COMMD10   | .420 | .035              | .023               | .353        | .488 |
| RDH14     | .368 | .034              | .000               | .303        | .434 |
| CRBN      | .391 | .034              | .002               | .324        | .458 |
| G6PD      | .638 | .034              | .000               | .572        | .704 |
| USP16     | .392 | .034              | .002               | .326        | .459 |
| STAT3     | .604 | .035              | .003               | .536        | .672 |
| HSPA8     | .402 | .034              | .005               | .334        | .469 |

a. 在非參數式假設下

b. 空值假設：true 區域 = 0.5
