# Supplementary material
Source: publisher figshare collection journal article supplement (https://frontiersin.figshare.com/ndownloader/files/15203375)
Supplement: Supplementary file 117 [file 15203375]

曲線下的區域

| 測試結果變數 | 區域圖  | 標準錯誤 <sup>a</sup> | 漸進顯著性 <sup>b</sup> | 漸進 95% 信賴區間 |      |
|--------|------|-------------------|--------------------|-------------|------|
|        |      |                   |                    | 下限          | 上限   |
| CLNS1A | .550 | .040              | .217               | .472        | .628 |
| CRBN   | .549 | .040              | .226               | .471        | .627 |
| NDUFB5 | .572 | .040              | .077               | .494        | .650 |
| RALA   | .563 | .040              | .122               | .485        | .640 |
| CAMLG  | .541 | .040              | .306               | .463        | .620 |
| DDX1   | .522 | .040              | .579               | .444        | .601 |
| PPP3CB | .566 | .040              | .101               | .489        | .644 |
| EBAG9  | .541 | .040              | .306               | .464        | .619 |
| SNRPF  | .541 | .040              | .316               | .461        | .620 |
| GPN1   | .469 | .040              | .441               | .390        | .548 |
| AK3    | .521 | .041              | .599               | .441        | .601 |
| CCDC25 | .535 | .041              | .392               | .455        | .614 |
| MTERF3 | .513 | .040              | .741               | .434        | .593 |
| PDCD2  | .525 | .040              | .545               | .447        | .602 |

測試結果變數：CLNS1A，CRBN，NDUFB5，RALA，CAMLG，DDX1，PPP3CB，EBAG9，SNRPF，GPN1，AK3，CCDC25，MTERF3，PDCD2 在正數實際狀態與負數實際狀態群組之間至少有一個連結空間。統計資料可能有偏差。

a. 在非參數式假設下

b. 空值假設：true 區域 = 0.5
