# Supplementary material
Source: publisher figshare collection journal article supplement (https://frontiersin.figshare.com/ndownloader/files/15203375)
Supplement: Supplementary file 120 [file 15203375]

& [頁面標題]

曲線下的區域

| 測試結果變數  | 區域圖  | 標準錯誤 <sup>a</sup> | 漸進顯著性 <sup>b</sup> | 漸進 95% 信賴區間 |      |
|---------|------|-------------------|--------------------|-------------|------|
|         |      |                   |                    | 下限          | 上限   |
| THAP12  | .369 | .036              | .000               | .299        | .439 |
| ANKRD49 | .361 | .036              | .000               | .292        | .431 |
| RPS6KB1 | .389 | .037              | .003               | .317        | .460 |
| PPM1B   | .371 | .036              | .001               | .301        | .440 |
| PPP2CA  | .467 | .038              | .380               | .394        | .541 |
| CD58    | .412 | .036              | .018               | .340        | .483 |
| CNIH1   | .382 | .037              | .002               | .311        | .454 |
| ARGLU1  | .378 | .036              | .001               | .306        | .449 |
| SNRK    | .388 | .036              | .003               | .317        | .458 |
| UPF2    | .443 | .037              | .129               | .370        | .516 |
| PCNX4   | .442 | .037              | .121               | .369        | .515 |
| ST8SIA4 | .416 | .037              | .024               | .344        | .488 |
| TRIM33  | .436 | .037              | .086               | .363        | .509 |
| BCLAF1  | .422 | .037              | .036               | .350        | .494 |

a. 在非參數式假設下

b. 空值假設：true 區域 = 0.5
