# Supplementary material
Source: publisher figshare collection journal article supplement (https://frontiersin.figshare.com/ndownloader/files/15203375)
Supplement: Supplementary file 121 [file 15203375]

曲線下的區域

| 測試結果變數   | 區域圖  | 標準錯誤 <sup>a</sup> | 漸進顯著性 <sup>b</sup> | 漸進 95% 信賴區間 |      |
|----------|------|-------------------|--------------------|-------------|------|
|          |      |                   |                    | 下限          | 上限   |
| TOMM7    | .207 | .033              | .000               | .143        | .271 |
| RPS3A    | .258 | .036              | .000               | .187        | .329 |
| RPS17    | .235 | .035              | .000               | .167        | .303 |
| NDUFB3   | .221 | .034              | .000               | .155        | .287 |
| RPS27    | .248 | .035              | .000               | .179        | .317 |
| LSM3     | .224 | .034              | .000               | .158        | .290 |
| PSMA4    | .225 | .034              | .000               | .159        | .291 |
| RPL17    | .245 | .036              | .000               | .175        | .316 |
| PSMA6    | .239 | .035              | .000               | .171        | .307 |
| DPM1     | .180 | .031              | .000               | .120        | .240 |
| TMEM126B | .236 | .035              | .000               | .167        | .304 |
| MRPL22   | .247 | .035              | .000               | .177        | .316 |
| ATP5J    | .252 | .035              | .000               | .183        | .321 |
| RPL26L1  | .249 | .035              | .000               | .180        | .318 |
| LARP7    | .240 | .035              | .000               | .172        | .308 |

測試結果變數：TOMM7，RPS3A，RPS17，RPS27，PSMA4，RPL17，PSMA6，MRPL22，RPL26L1 在正數實際狀態與負數實際狀態群組之間至少有一個連結空間。統計資料可能有偏差。

a. 在非參數式假設下

b. 空值假設：true 區域 = 0.5
