# Supplementary material
Source: publisher figshare collection journal article supplement (https://frontiersin.figshare.com/ndownloader/files/15203375)
Supplement: Supplementary file 122 [file 15203375]

& [頁面標題]

曲線下的區域

| 測試結果變數  | 區域圖  | 標準錯誤 <sup>a</sup> | 漸進顯著性 <sup>b</sup> | 漸進 95% 信賴區間 |      |
|---------|------|-------------------|--------------------|-------------|------|
|         |      |                   |                    | 下限          | 上限   |
| REEP5   | .633 | .039              | .001               | .557        | .709 |
| CEBPZ   | .557 | .040              | .163               | .479        | .634 |
| CRBN    | .597 | .039              | .017               | .520        | .674 |
| RDH14   | .575 | .040              | .064               | .497        | .653 |
| HSPA8   | .497 | .040              | .940               | .419        | .575 |
| G6PD    | .452 | .040              | .239               | .375        | .530 |
| STAT3   | .496 | .041              | .923               | .417        | .576 |
| USP16   | .567 | .039              | .100               | .489        | .644 |
| DENR    | .561 | .040              | .133               | .483        | .639 |
| GBA     | .458 | .040              | .301               | .380        | .536 |
| MITD1   | .587 | .040              | .033               | .509        | .664 |
| PRRC2A  | .403 | .040              | .016               | .324        | .481 |
| ACADM   | .562 | .041              | .123               | .483        | .642 |
| COMMD10 | .587 | .040              | .032               | .509        | .665 |
| DTX2    | .449 | .040              | .207               | .370        | .528 |

測試結果變數：REEP5，CEBPZ，HSPA8，G6PD，STAT3，USP16，DENR，GBA，MITD1，PRRC2A，DTX2 在正數實際狀態與負數實際狀態群組之間至少有一個連結空間。統計資料可能有偏差。

a. 在非參數式假設下

b. 空值假設：true 區域 = 0.5
