# Supplementary material
Source: publisher figshare collection journal article supplement (https://frontiersin.figshare.com/ndownloader/files/15203375)
Supplement: Supplementary file 126 [file 15203375]

曲線下的區域

| 測試結果變數 | 區域圖  | 標準錯誤 <sup>a</sup> | 漸進顯著性 <sup>b</sup> | 漸進 95% 信賴區間 |      |
|--------|------|-------------------|--------------------|-------------|------|
|        |      |                   |                    | 下限          | 上限   |
| SRGN   | .385 | .037              | .002               | .312        | .457 |
| WDR6   | .657 | .036              | .000               | .587        | .727 |
| ECH1   | .605 | .036              | .005               | .534        | .676 |
| CXXC1  | .631 | .036              | .000               | .560        | .702 |
| JADE2  | .529 | .038              | .432               | .456        | .603 |
| TRPV2  | .621 | .036              | .001               | .550        | .691 |
| PUF60  | .585 | .037              | .023               | .512        | .658 |
| SBF1   | .722 | .034              | .000               | .655        | .788 |
| SRRT   | .630 | .037              | .001               | .558        | .701 |
| NDUFV1 | .587 | .037              | .020               | .515        | .659 |
| SCAMP3 | .552 | .037              | .163               | .480        | .624 |
| DDX56  | .610 | .037              | .003               | .538        | .682 |
| GPS1   | .621 | .037              | .001               | .549        | .693 |
| TNPO2  | .637 | .037              | .000               | .565        | .708 |

測試結果變數：SRGN，WDR6，ECH1，CXXC1，JADE2，TRPV2，PUF60，SBF1，SRRT，NDUFV1，SCAMP3，DDX56，GPS1，TNPO2 在正數實際狀態與負數實際狀態群組之間至少有一個連結空間。統計資料可能有偏差。

a. 在非參數式假設下

b. 空值假設：true 區域 = 0.5
