# Supplementary material
Source: publisher figshare collection journal article supplement (https://frontiersin.figshare.com/ndownloader/files/15203375)
Supplement: Supplementary file 136 [file 15203375]

& [頁面標題]

曲線下的區域

| 測試結果變數 | 區域圖  | 標準錯誤 <sup>a</sup> | 漸進顯著性 <sup>b</sup> | 漸進 95% 信賴區間 |      |
|--------|------|-------------------|--------------------|-------------|------|
|        |      |                   |                    | 下限          | 上限   |
| ECH1   | .512 | .037              | .745               | .440        | .584 |
| TNP02  | .477 | .037              | .537               | .404        | .550 |
| WDR6   | .473 | .037              | .463               | .400        | .546 |
| DDX56  | .498 | .037              | .948               | .424        | .571 |
| CXXC1  | .456 | .037              | .233               | .383        | .529 |
| SBF1   | .483 | .037              | .641               | .410        | .556 |
| PUF60  | .466 | .037              | .364               | .394        | .539 |
| NDUFV1 | .476 | .037              | .521               | .404        | .548 |
| SCAMP3 | .480 | .037              | .581               | .407        | .552 |
| JADE2  | .410 | .037              | .015               | .338        | .482 |
| GPS1   | .494 | .037              | .869               | .421        | .567 |
| TRPV2  | .467 | .037              | .378               | .395        | .540 |
| SRGN   | .478 | .037              | .546               | .404        | .551 |
| SRRT   | .505 | .037              | .894               | .432        | .578 |

a. 在非參數式假設下

b. 空值假設：true 區域 = 0.5
