# Supplementary material
Source: publisher figshare collection journal article supplement (https://frontiersin.figshare.com/ndownloader/files/15203375)
Supplement: Supplementary file 137 [file 15203375]

& [頁面標題]

曲線下的區域

| 測試結果變數  | 區域圖  | 標準錯誤 <sup>a</sup> | 漸進顯著性 <sup>b</sup> | 漸進 95% 信賴區間 |      |
|---------|------|-------------------|--------------------|-------------|------|
|         |      |                   |                    | 下限          | 上限   |
| REEP5   | .242 | .035              | .000               | .172        | .311 |
| CEBPZ   | .230 | .034              | .000               | .163        | .297 |
| CRBN    | .220 | .034              | .000               | .154        | .287 |
| RDH14   | .230 | .035              | .000               | .162        | .298 |
| HSPA8   | .271 | .038              | .000               | .196        | .345 |
| G6PD    | .715 | .038              | .000               | .640        | .790 |
| STAT3   | .668 | .040              | .000               | .590        | .745 |
| USP16   | .231 | .035              | .000               | .163        | .300 |
| DENR    | .233 | .035              | .000               | .165        | .301 |
| GBA     | .736 | .037              | .000               | .664        | .808 |
| MITD1   | .173 | .031              | .000               | .112        | .234 |
| PRRC2A  | .735 | .037              | .000               | .662        | .808 |
| ACADM   | .257 | .038              | .000               | .184        | .331 |
| COMMD10 | .261 | .037              | .000               | .188        | .334 |
| DTX2    | .694 | .039              | .000               | .618        | .769 |

測試結果變數：REEP5，CRBN，RDH14，HSPA8，G6PD，STAT3，USP16，DENR，GBA，MITD1，PRRC2A，ACADM，DTX2 在正數實際狀態與負數實際狀態群組之間至少有一個連結空間。統計資料可能有偏差。

a. 在非參數式假設下

b. 空值假設：true 區域 = 0.5
