# Supplementary material
Source: publisher figshare collection journal article supplement (https://frontiersin.figshare.com/ndownloader/files/15203375)
Supplement: Supplementary file 140 [file 15203375]

& [頁面標題]

曲線下的區域

| 測試結果變數  | 區域圖  | 標準錯誤 <sup>a</sup> | 漸進顯著性 <sup>b</sup> | 漸進 95% 信賴區間 |      |
|---------|------|-------------------|--------------------|-------------|------|
|         |      |                   |                    | 下限          | 上限   |
| FPR2    | .546 | .041              | .252               | .466        | .627 |
| REPS2   | .517 | .041              | .669               | .438        | .597 |
| MXD1    | .618 | .039              | .004               | .542        | .694 |
| PFKFB4  | .553 | .040              | .192               | .475        | .630 |
| MANSC1  | .526 | .041              | .515               | .446        | .607 |
| LAMP2   | .573 | .040              | .070               | .494        | .652 |
| RNF149  | .588 | .040              | .030               | .509        | .667 |
| MSRB1   | .592 | .039              | .023               | .515        | .669 |
| FCGR2A  | .526 | .041              | .514               | .446        | .606 |
| SVIL    | .549 | .041              | .227               | .469        | .629 |
| ZNF746  | .517 | .041              | .680               | .437        | .597 |
| SIRPA   | .486 | .040              | .735               | .408        | .565 |
| DENND5A | .583 | .039              | .041               | .506        | .660 |
| P6V1B2  | .528 | .042              | .486               | .446        | .610 |
| NDEL1   | .530 | .041              | .454               | .451        | .610 |

測試結果變數：FPR2，REPS2，MXD1，PFKFB4，MANSC1，LAMP2，RNF149，MSRB1，SVIL，ZNF746，SIRPA，DENND5A，P6V1B2，NDEL1 在正數實際狀態與負數實際狀態群組之間至少有一個連結空間。統計資料可能有偏差。

a. 在非參數式假設下

b. 空值假設：true 區域 = 0.5
