# Supplementary material
Source: publisher figshare collection journal article supplement (https://frontiersin.figshare.com/ndownloader/files/15203375)
Supplement: Supplementary file 146 [file 15203375]

曲線下的區域

| 測試結果變數  | 區域圖  | 標準錯誤 <sup>a</sup> | 漸進顯著性 <sup>b</sup> | 漸進 95% 信賴區間 |      |
|---------|------|-------------------|--------------------|-------------|------|
|         |      |                   |                    | 下限          | 上限   |
| ARGLU1  | .377 | .036              | .001               | .308        | .447 |
| PPM1B   | .316 | .034              | .000               | .248        | .383 |
| THAP12  | .400 | .036              | .007               | .329        | .471 |
| SNRK    | .380 | .037              | .001               | .308        | .452 |
| CD58    | .365 | .036              | .000               | .295        | .436 |
| ANKRD49 | .346 | .035              | .000               | .278        | .415 |
| ST8SIA4 | .408 | .037              | .014               | .337        | .480 |
| RPS6KB1 | .359 | .035              | .000               | .289        | .428 |
| PPP2CA  | .397 | .036              | .006               | .326        | .469 |
| CNIH1   | .587 | .037              | .020               | .514        | .660 |
| BCLAF1  | .415 | .037              | .023               | .343        | .487 |
| PCNX4   | .376 | .036              | .001               | .306        | .446 |
| TRIM33  | .473 | .037              | .474               | .400        | .546 |
| UPF2    | .397 | .037              | .006               | .325        | .469 |

測試結果變數：ARGLU1，PPM1B，THAP12，SNRK，CD58，ST8SIA4，RPS6KB1，PPP2CA，CNIH1，BCLAF1，TRIM33，UPF2 在正數實際狀態與負數實際狀態群組之間至少有一個連結空間。統計資料可能有偏差。

a. 在非參數式假設下

b. 空值假設：true 區域 = 0.5
