# Supplementary material
Source: publisher figshare collection journal article supplement (https://frontiersin.figshare.com/ndownloader/files/15203375)
Supplement: Supplementary file 148 [file 15203375]

& [頁面標題]

曲線下的區域

| 測試結果變數  | 區域圖  | 標準錯誤 <sup>a</sup> | 漸進顯著性 <sup>b</sup> | 漸進 95% 信賴區間 |      |
|---------|------|-------------------|--------------------|-------------|------|
|         |      |                   |                    | 下限          | 上限   |
| THAP12  | .529 | .037              | .439               | .456        | .601 |
| ANKRD49 | .528 | .037              | .448               | .456        | .600 |
| RPS6KB1 | .534 | .037              | .351               | .462        | .607 |
| PPM1B   | .557 | .037              | .121               | .485        | .630 |
| PPP2CA  | .541 | .037              | .272               | .468        | .614 |
| CD58    | .496 | .037              | .907               | .422        | .569 |
| CNIH1   | .626 | .036              | .001               | .556        | .697 |
| ARGLU1  | .558 | .037              | .120               | .486        | .629 |
| SNRK    | .548 | .037              | .196               | .475        | .621 |
| UPF2    | .491 | .037              | .802               | .418        | .564 |
| PCNX4   | .526 | .037              | .491               | .453        | .598 |
| ST8SIA4 | .515 | .037              | .685               | .442        | .588 |
| TRIM33  | .551 | .037              | .166               | .480        | .623 |
| BCLAF1  | .520 | .037              | .596               | .447        | .592 |

a. 在非參數式假設下

b. 空值假設：true 區域 = 0.5
