# Supplementary material
Source: publisher figshare collection journal article supplement (https://frontiersin.figshare.com/ndownloader/files/15203375)
Supplement: Supplementary file 151 [file 15203375]

曲線下的區域

| 測試結果變數  | 區域圖  | 標準錯誤 <sup>a</sup> | 漸進顯著性 <sup>b</sup> | 漸進 95% 信賴區間 |      |
|---------|------|-------------------|--------------------|-------------|------|
|         |      |                   |                    | 下限          | 上限   |
| ACTR3   | .309 | .039              | .000               | .233        | .385 |
| MTPN    | .303 | .039              | .000               | .227        | .379 |
| ADD3    | .406 | .042              | .029               | .324        | .488 |
| SACM1L  | .316 | .039              | .000               | .240        | .393 |
| WIPF1   | .388 | .042              | .009               | .306        | .470 |
| CMPK1   | .303 | .038              | .000               | .228        | .378 |
| FAM49B  | .349 | .040              | .000               | .270        | .428 |
| PHIP    | .305 | .039              | .000               | .229        | .381 |
| UBLCP   | .285 | .038              | .000               | .211        | .359 |
| STK26   | .306 | .039              | .000               | .228        | .383 |
| LUC7L3  | .341 | .040              | .000               | .262        | .420 |
| ANKRD10 | .369 | .041              | .002               | .288        | .450 |
| GIMAP2  | .283 | .038              | .000               | .208        | .357 |
| ATF4    | .392 | .042              | .013               | .311        | .474 |

測試結果變數：MTPN，ADD3，SACM1L，WIPF1，FAM49B，UBLCP，LUC7L3，GIMAP2，ATF4 在正數實際狀態與負數實際狀態群組之間至少有一個連結空間。統計資料可能有偏差。

a. 在非參數式假設下

b. 空值假設：true 區域 = 0.5
