# Supplementary material
Source: publisher figshare collection journal article supplement (https://frontiersin.figshare.com/ndownloader/files/15203375)
Supplement: Supplementary file 176 [file 15203375]

& [頁面標題]

曲線下的區域

| 測試結果變數  | 區域圖  | 標準錯誤 <sup>a</sup> | 漸進顯著性 <sup>b</sup> | 漸進 95% 信賴區間 |      |
|---------|------|-------------------|--------------------|-------------|------|
|         |      |                   |                    | 下限          | 上限   |
| ACTR3   | .421 | .037              | .035               | .349        | .493 |
| GIMAP2  | .424 | .037              | .043               | .352        | .497 |
| ANKRD10 | .480 | .037              | .592               | .407        | .553 |
| LUC7L3  | .406 | .037              | .011               | .334        | .477 |
| SACM1L  | .433 | .037              | .072               | .361        | .505 |
| ADD3    | .478 | .037              | .561               | .405        | .551 |
| PHIP    | .436 | .037              | .086               | .363        | .509 |
| CMPK1   | .401 | .036              | .008               | .329        | .472 |
| FAM49B  | .458 | .037              | .258               | .385        | .531 |
| MTPN    | .485 | .037              | .692               | .412        | .558 |
| UBLCP   | .395 | .036              | .005               | .324        | .466 |
| STK26   | .420 | .037              | .032               | .348        | .492 |
| WIPF1   | .550 | .037              | .177               | .478        | .623 |
| ATF4    | .492 | .037              | .836               | .419        | .565 |

a. 在非參數式假設下

b. 空值假設：true 區域 = 0.5
