# Supplementary material
Source: publisher figshare collection journal article supplement (https://frontiersin.figshare.com/ndownloader/files/15203375)
Supplement: Supplementary file 179 [file 15203375]

& [頁面標題]

曲線下的區域

| 測試結果變數 | 區域圖  | 標準錯誤 <sup>a</sup> | 漸進顯著性 <sup>b</sup> | 漸進 95% 信賴區間 |      |
|--------|------|-------------------|--------------------|-------------|------|
|        |      |                   |                    | 下限          | 上限   |
| ECH1   | .537 | .037              | .319               | .464        | .610 |
| TNP02  | .603 | .036              | .006               | .532        | .674 |
| WDR6   | .604 | .036              | .005               | .533        | .676 |
| DDX56  | .532 | .037              | .391               | .459        | .605 |
| CXXC1  | .590 | .037              | .016               | .519        | .662 |
| SBF1   | .629 | .036              | .001               | .559        | .699 |
| PUF60  | .575 | .037              | .045               | .503        | .647 |
| NDUFV1 | .578 | .037              | .036               | .507        | .650 |
| SCAMP3 | .585 | .036              | .023               | .513        | .656 |
| JADE2  | .581 | .037              | .030               | .509        | .653 |
| GPS1   | .594 | .037              | .012               | .522        | .665 |
| TRPV2  | .617 | .036              | .002               | .546        | .689 |
| SRGN   | .443 | .037              | .128               | .370        | .516 |
| SRRT   | .607 | .037              | .004               | .535        | .679 |

a. 在非參數式假設下

b. 空值假設：true 區域 = 0.5
