# Supplementary material
Source: publisher figshare collection journal article supplement (https://frontiersin.figshare.com/ndownloader/files/15203375)
Supplement: Supplementary file 185 [file 15203375]

曲線下的區域

| 測試結果變數 | 區域圖  | 標準錯誤 <sup>a</sup> | 漸進顯著性 <sup>b</sup> | 漸進 95% 信賴區間 |      |
|--------|------|-------------------|--------------------|-------------|------|
|        |      |                   |                    | 下限          | 上限   |
| CRBN   | .398 | .036              | .006               | .327        | .469 |
| CAMLG  | .372 | .036              | .001               | .301        | .443 |
| CLNS1A | .338 | .035              | .000               | .269        | .407 |
| RALA   | .377 | .036              | .001               | .306        | .448 |
| GPN1   | .352 | .035              | .000               | .283        | .422 |
| AK3    | .372 | .036              | .001               | .302        | .441 |
| MTERF3 | .389 | .036              | .003               | .318        | .461 |
| CCDC25 | .363 | .036              | .000               | .293        | .433 |
| EBAG9  | .324 | .034              | .000               | .257        | .391 |
| PDCD2  | .331 | .035              | .000               | .263        | .400 |
| PPP3CB | .361 | .036              | .000               | .291        | .431 |
| NDUFB5 | .359 | .036              | .000               | .289        | .429 |
| SNRPF  | .332 | .034              | .000               | .265        | .400 |
| DDX1   | .373 | .036              | .001               | .303        | .443 |

a. 在非參數式假設下  
b. 空值假設：true 區域 = 0.5
