# Supplementary material (part 1 of 2)
Source: publisher figshare collection journal article supplement (https://frontiersin.figshare.com/ndownloader/files/15203375)

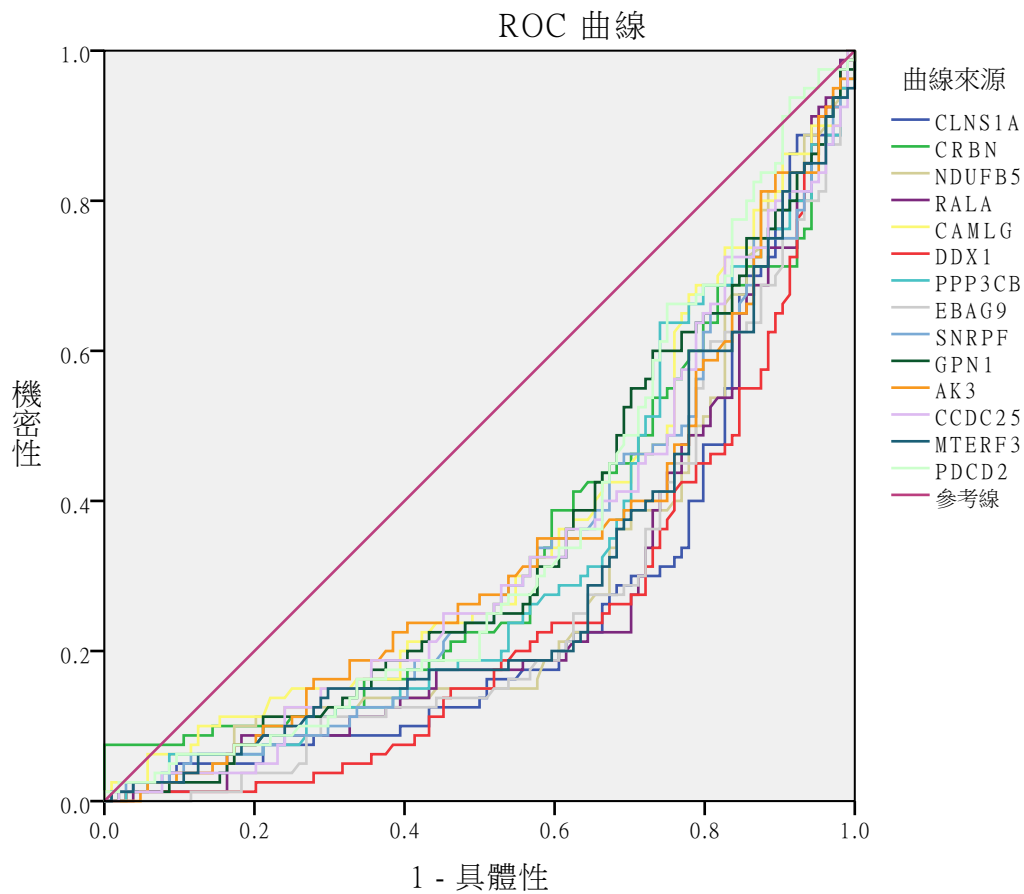

同分產生的對數區段。

Supplement: Supplementary file 6 [file 15203375]

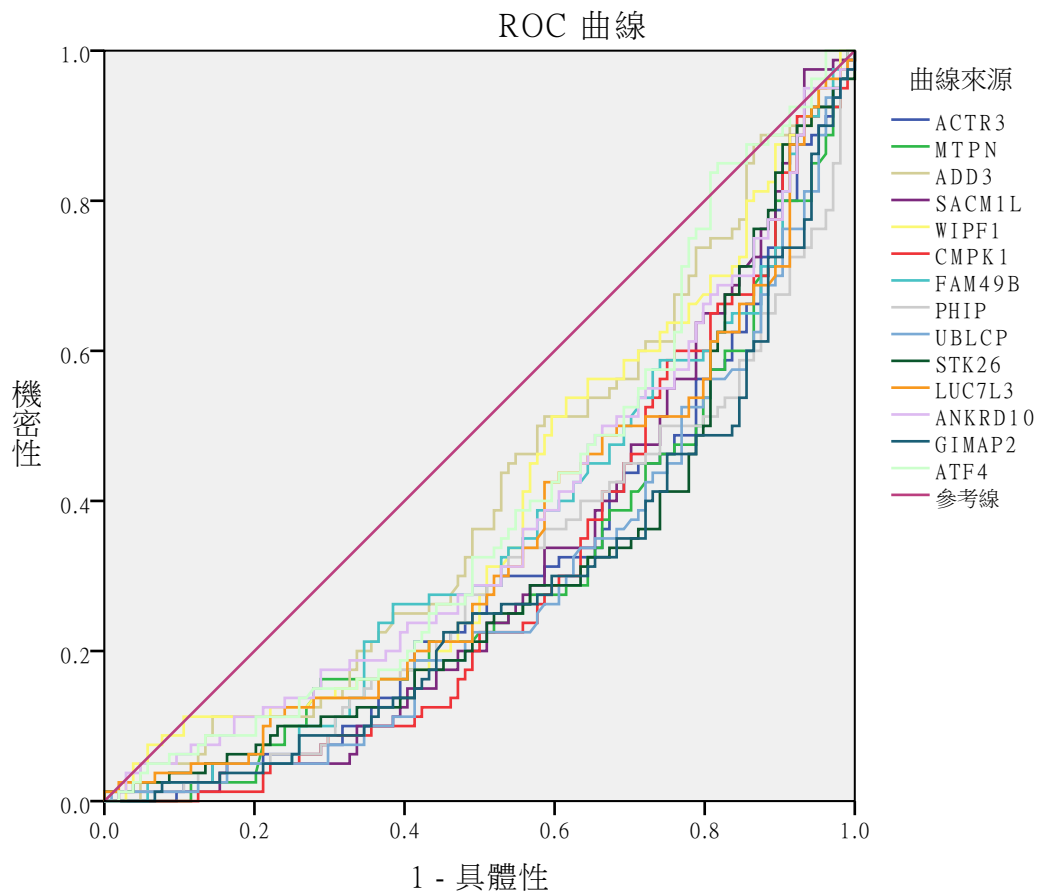

同分產生的對數區段。

Supplement: Supplementary file 7 [file 15203375]

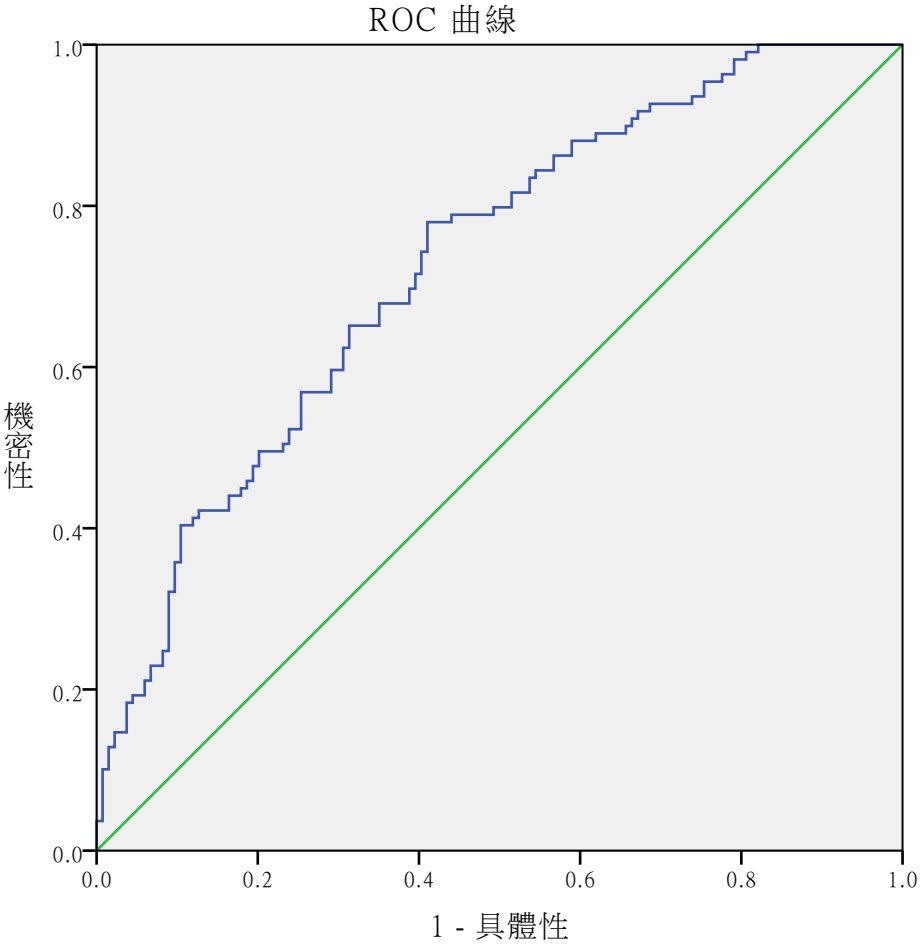

Supplement: Supplementary file 8 [file 15203375]

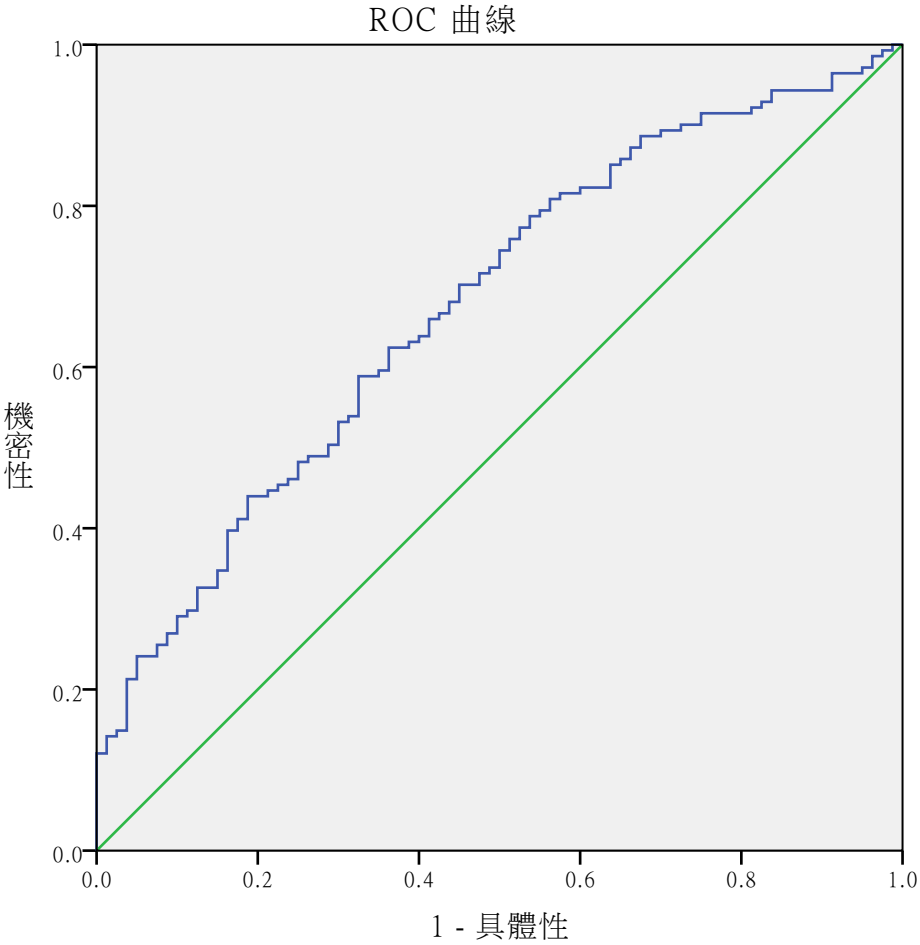

Supplement: Supplementary file 11 [file 15203375]

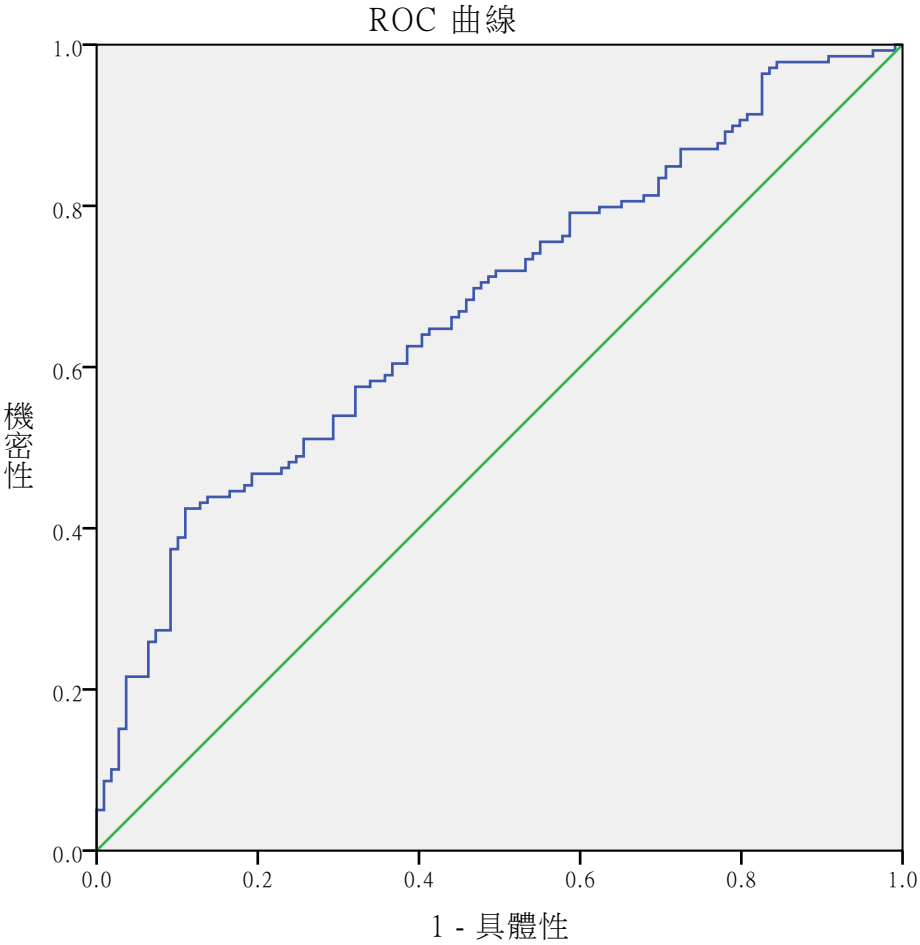

Supplement: Supplementary file 13 [file 15203375]

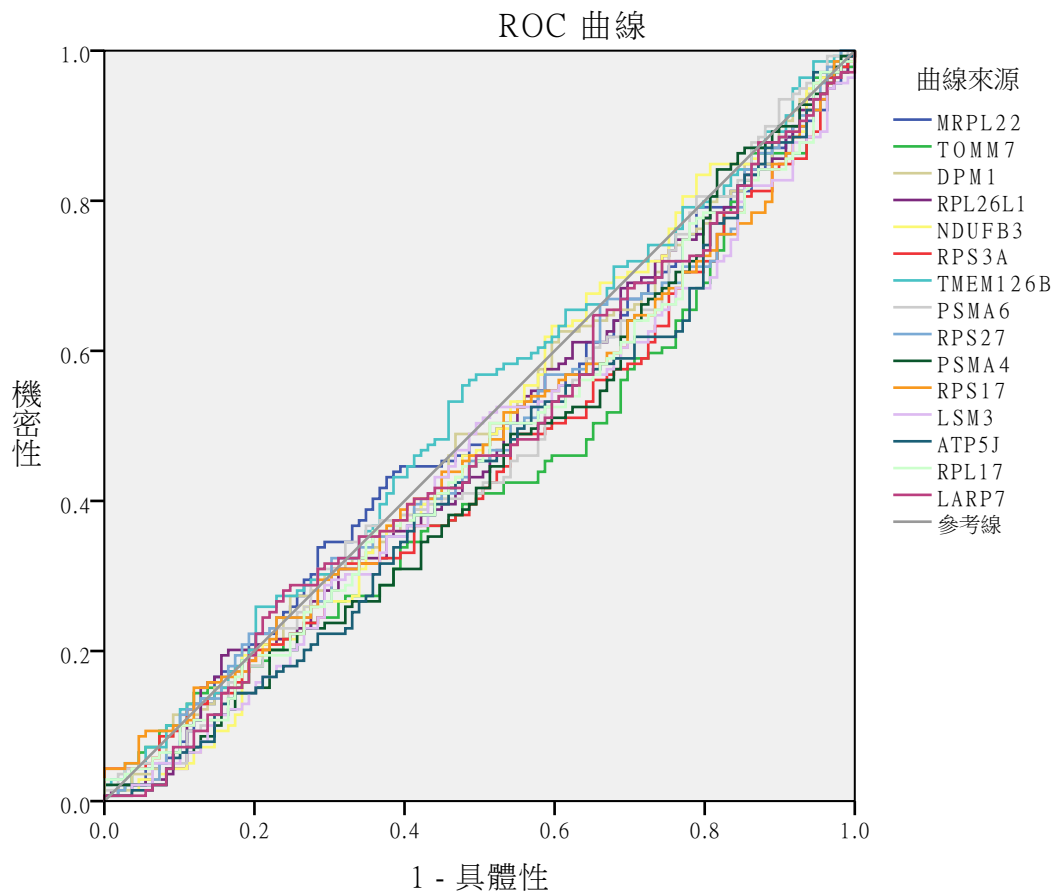

同分產生的對數區段。

Supplement: Supplementary file 15 [file 15203375]

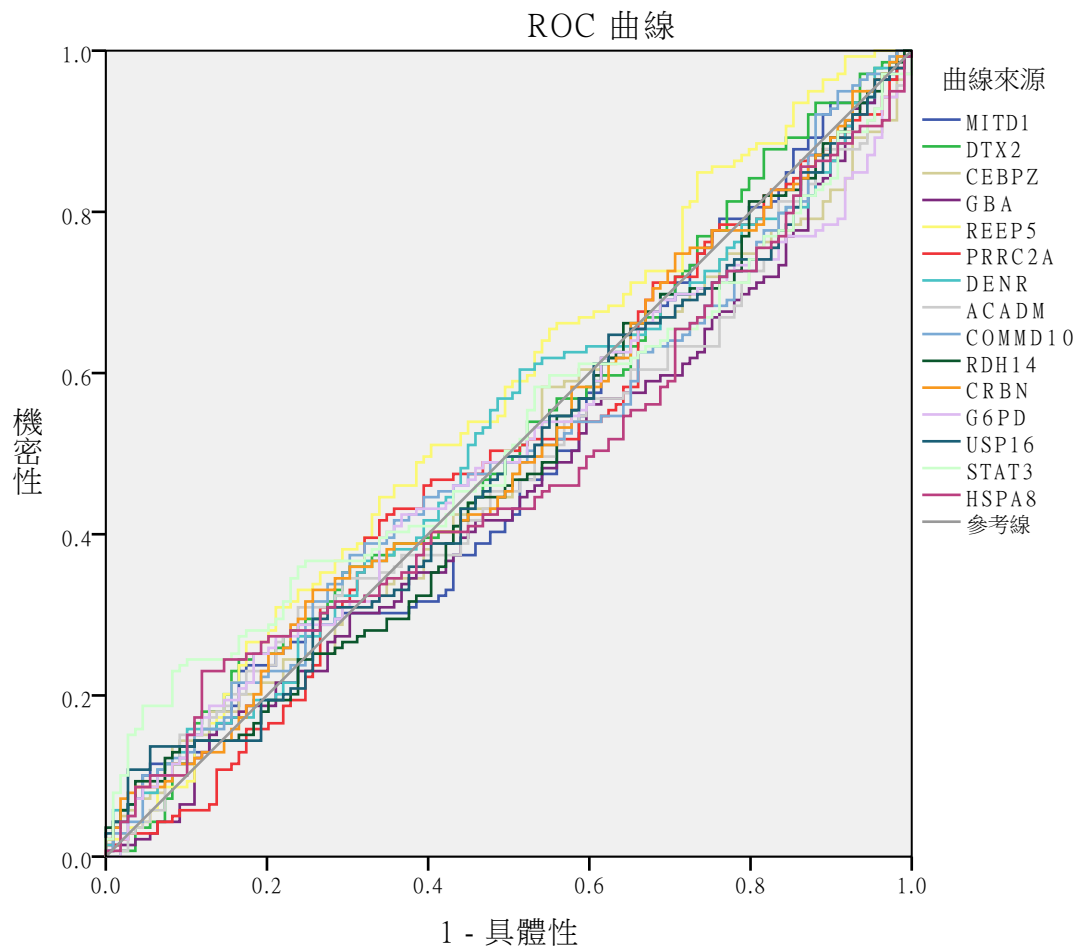

Supplement: Supplementary file 18 [file 15203375]

**Module membership vs. gene significance**  
**cor=0.25, p=2.5e-18**

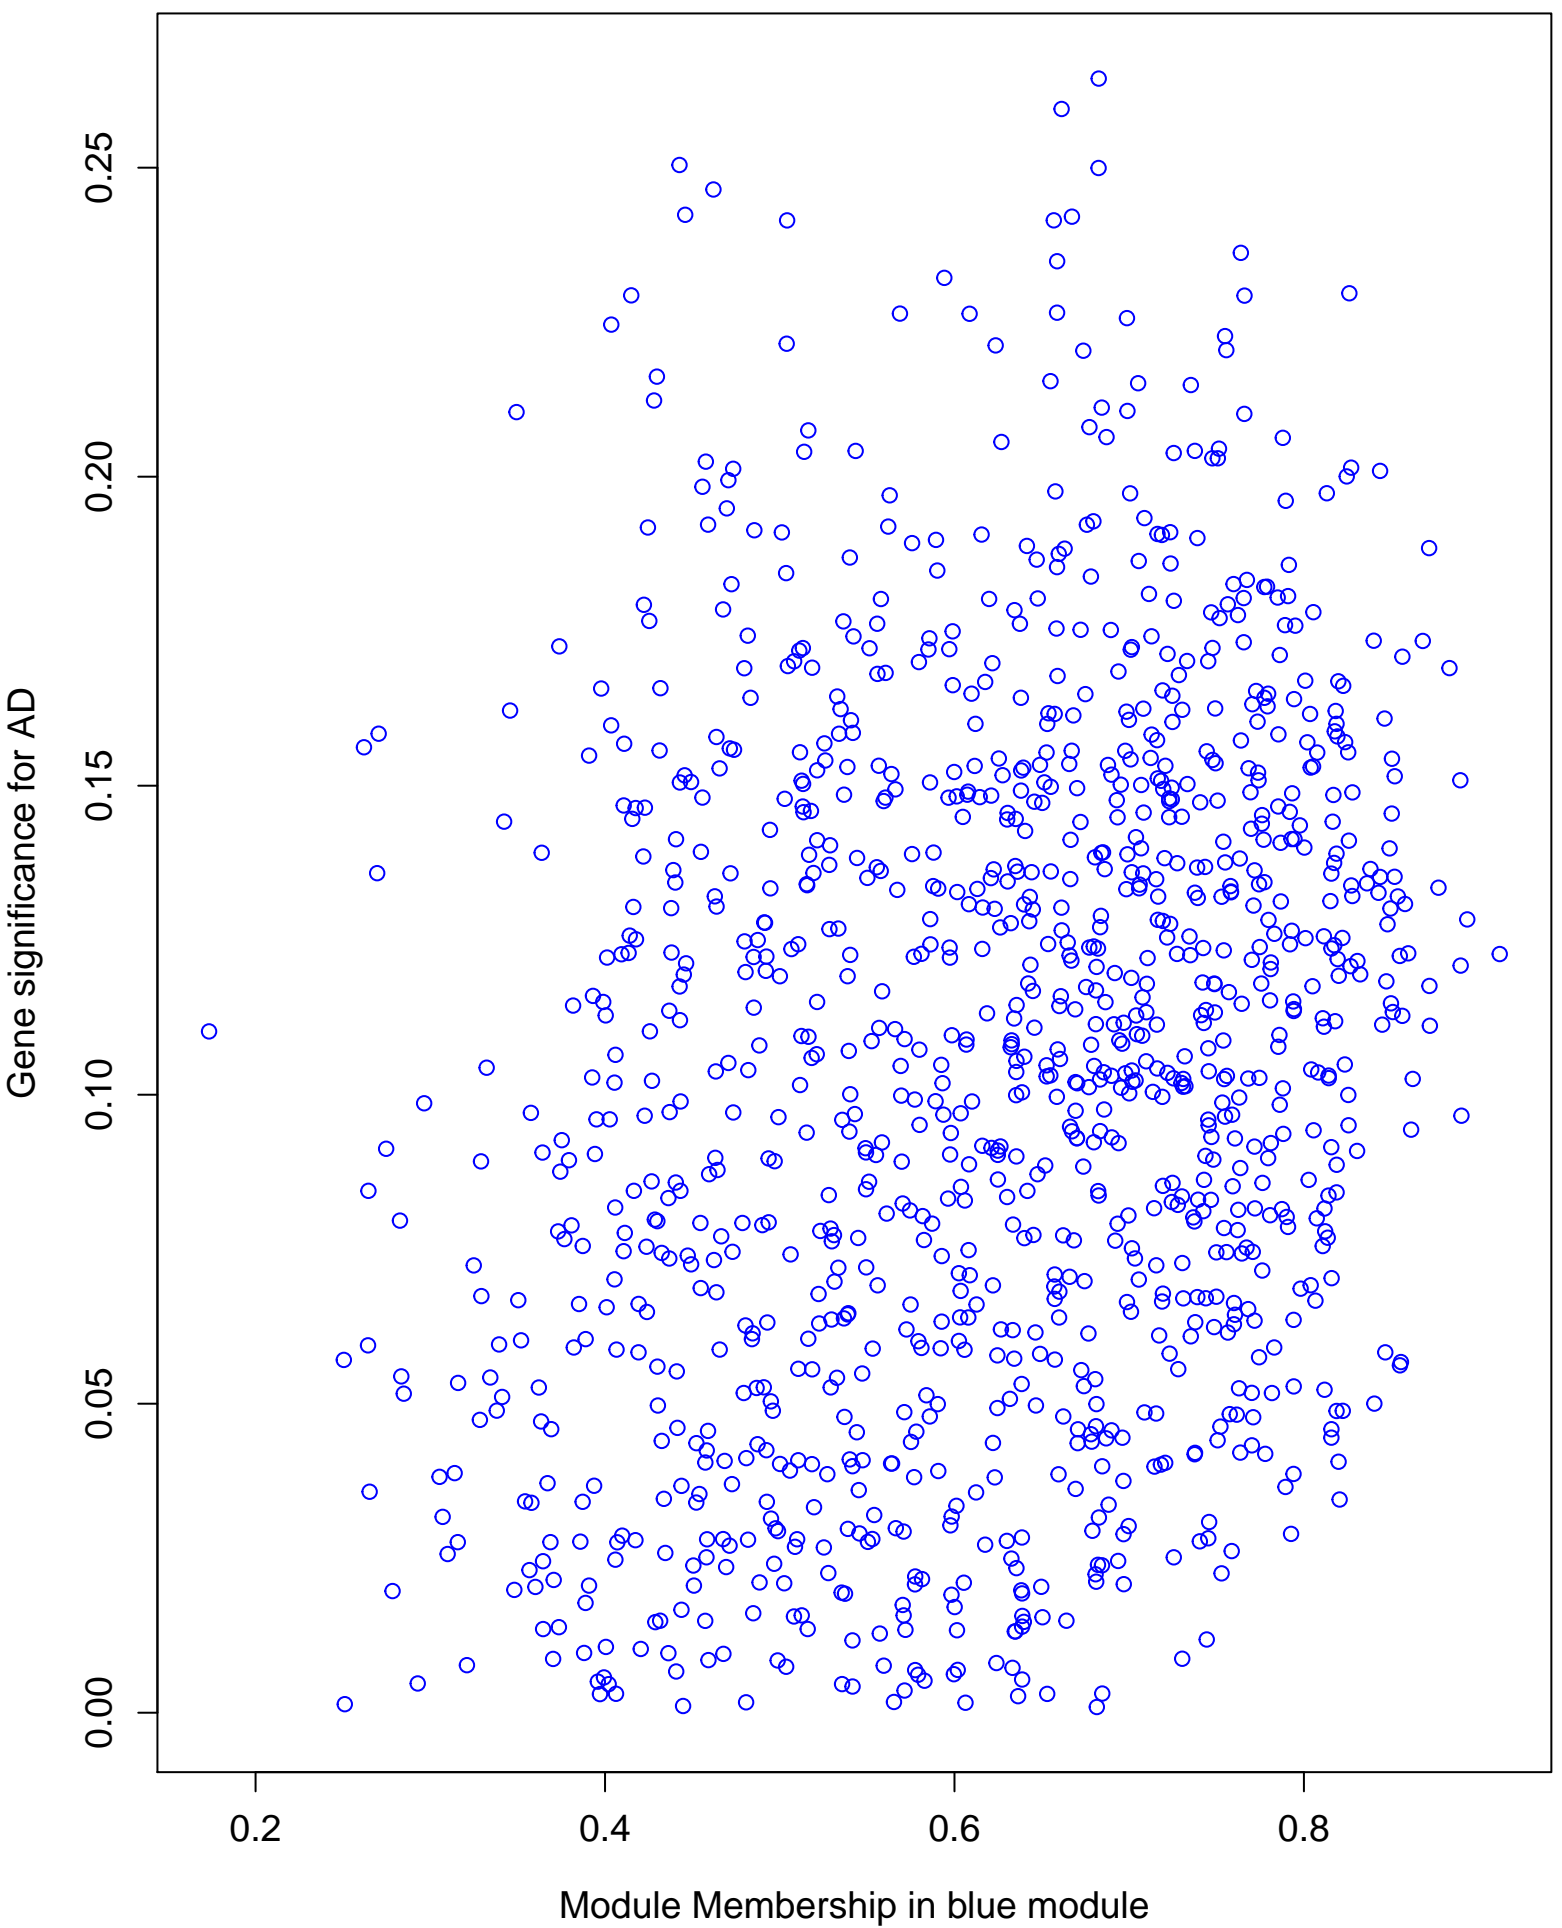

Supplement: Supplementary file 19 [file 15203375]

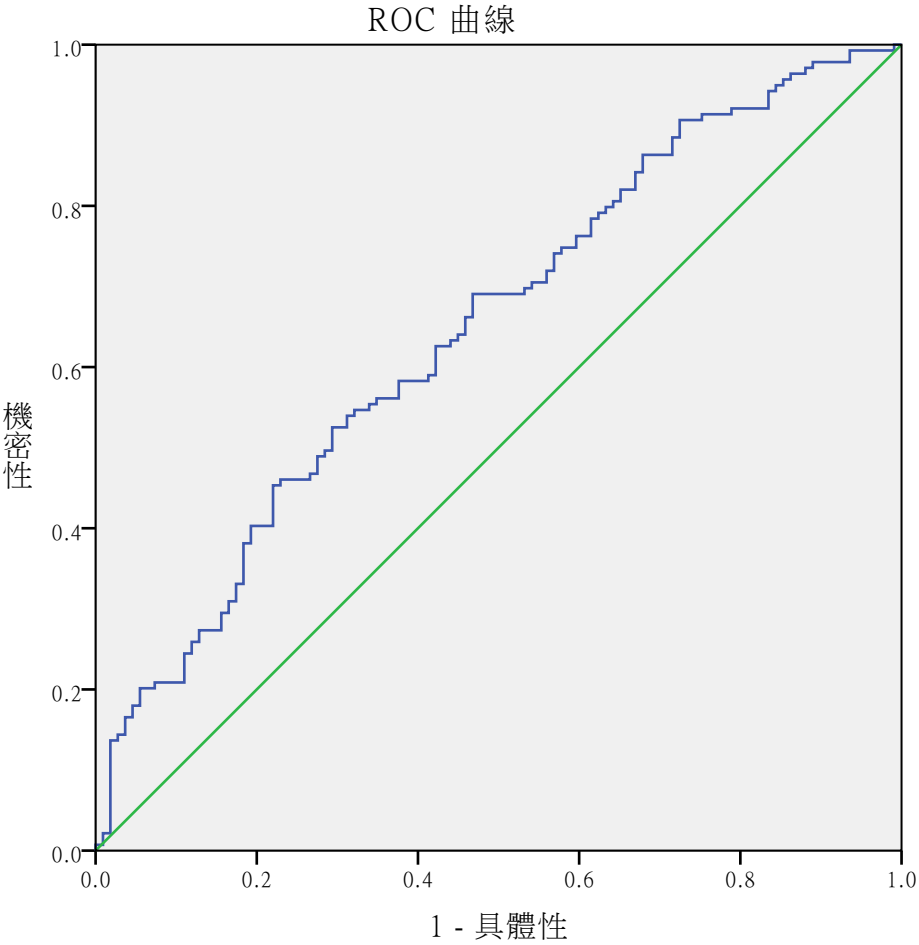

Supplement: Supplementary file 20 [file 15203375]

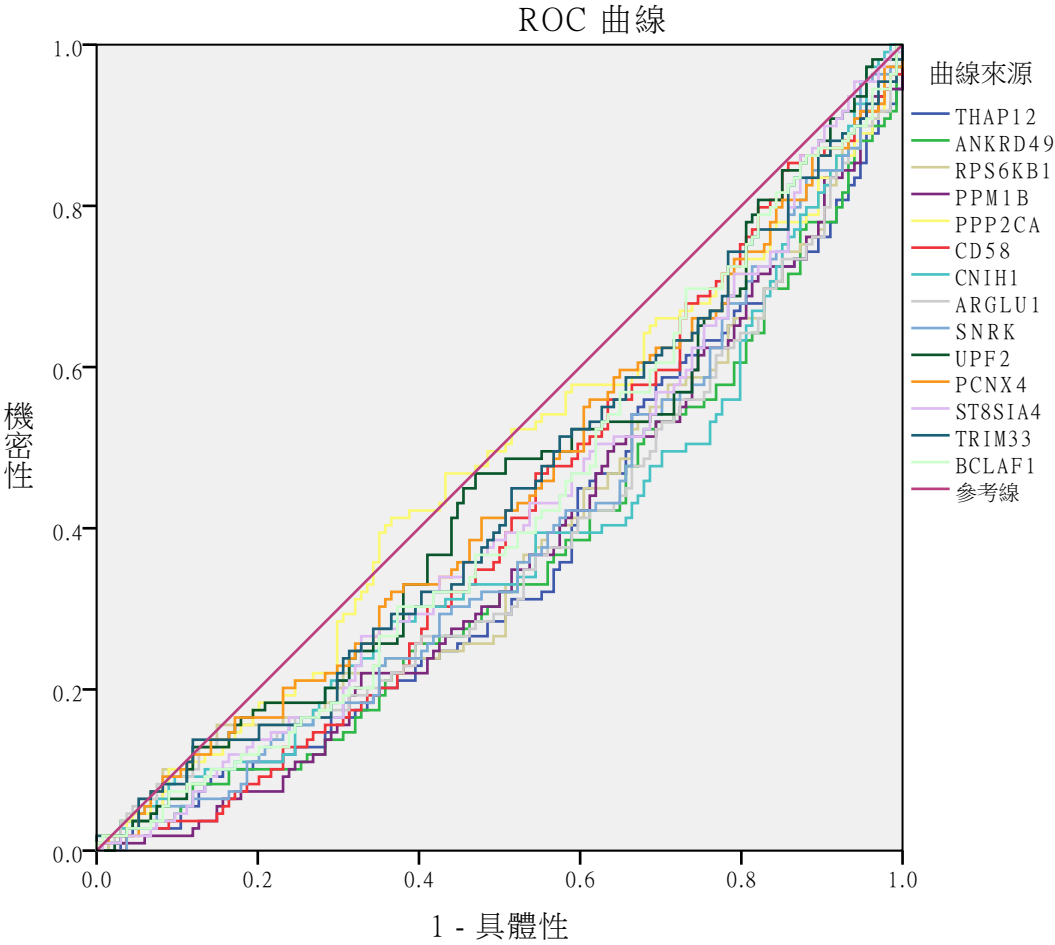

Supplement: Supplementary file 21 [file 15203375]

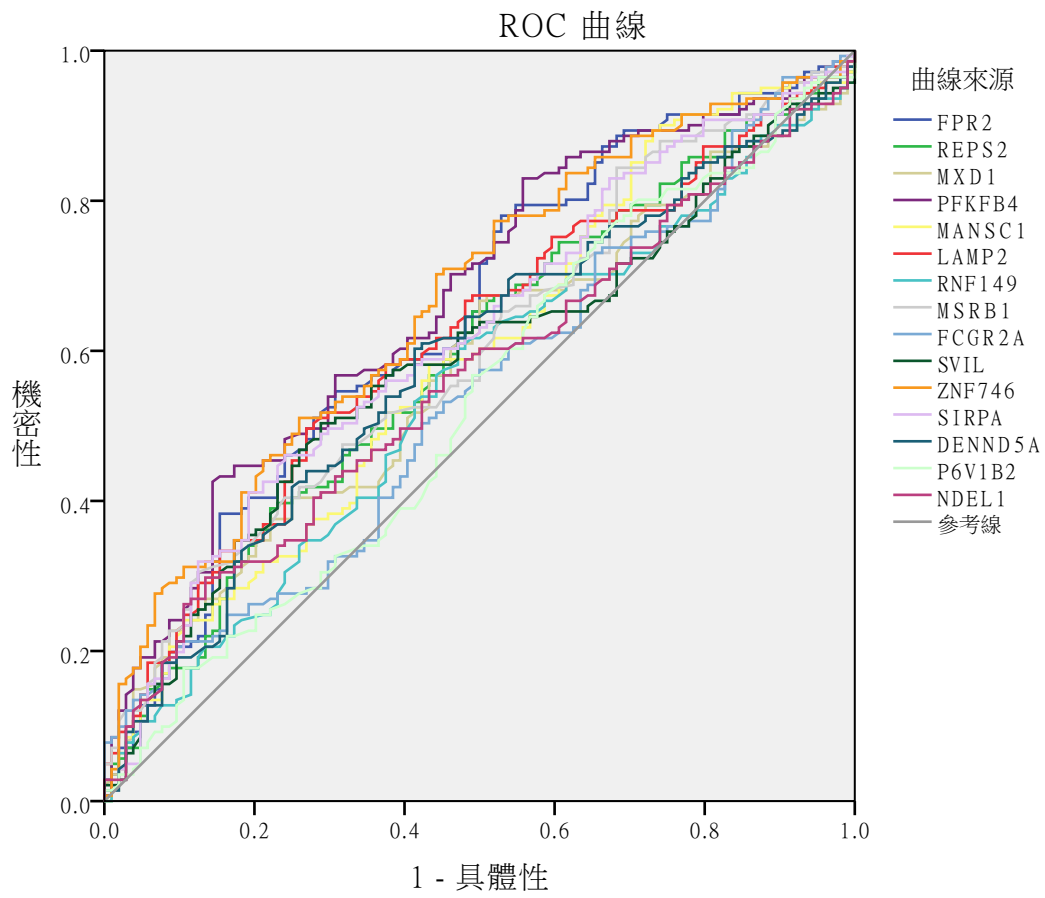

同分產生的對數區段。

Supplement: Supplementary file 22 [file 15203375]

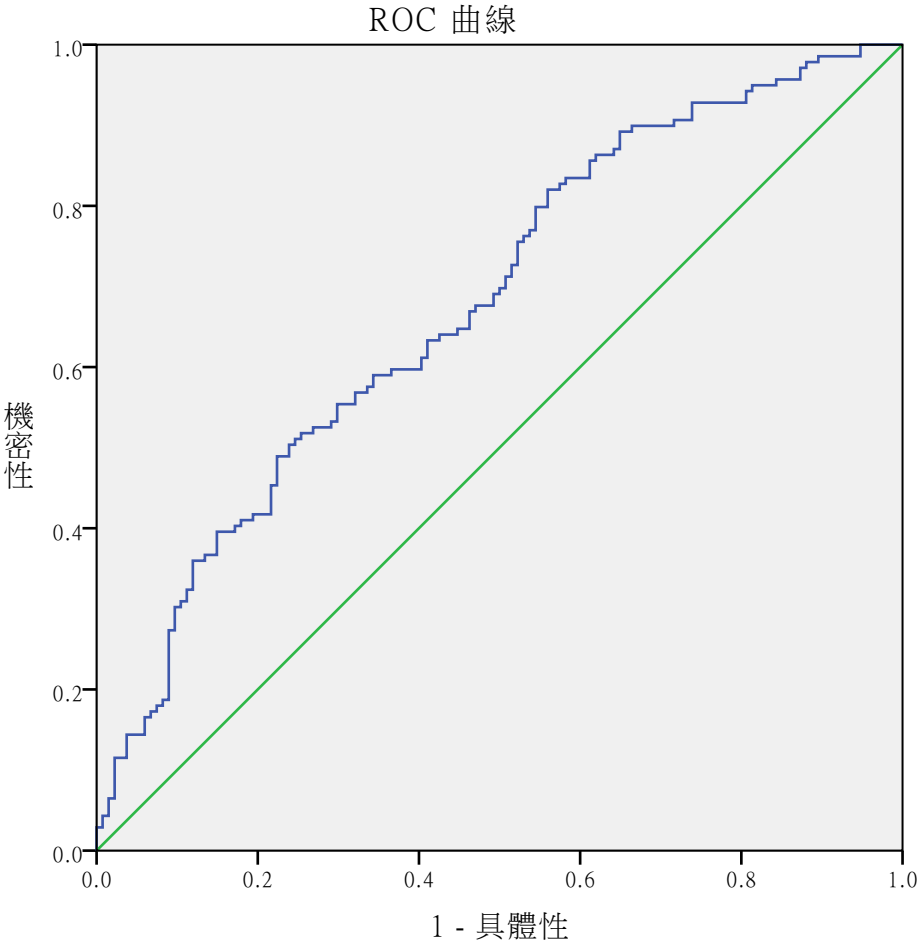

Supplement: Supplementary file 23 [file 15203375]

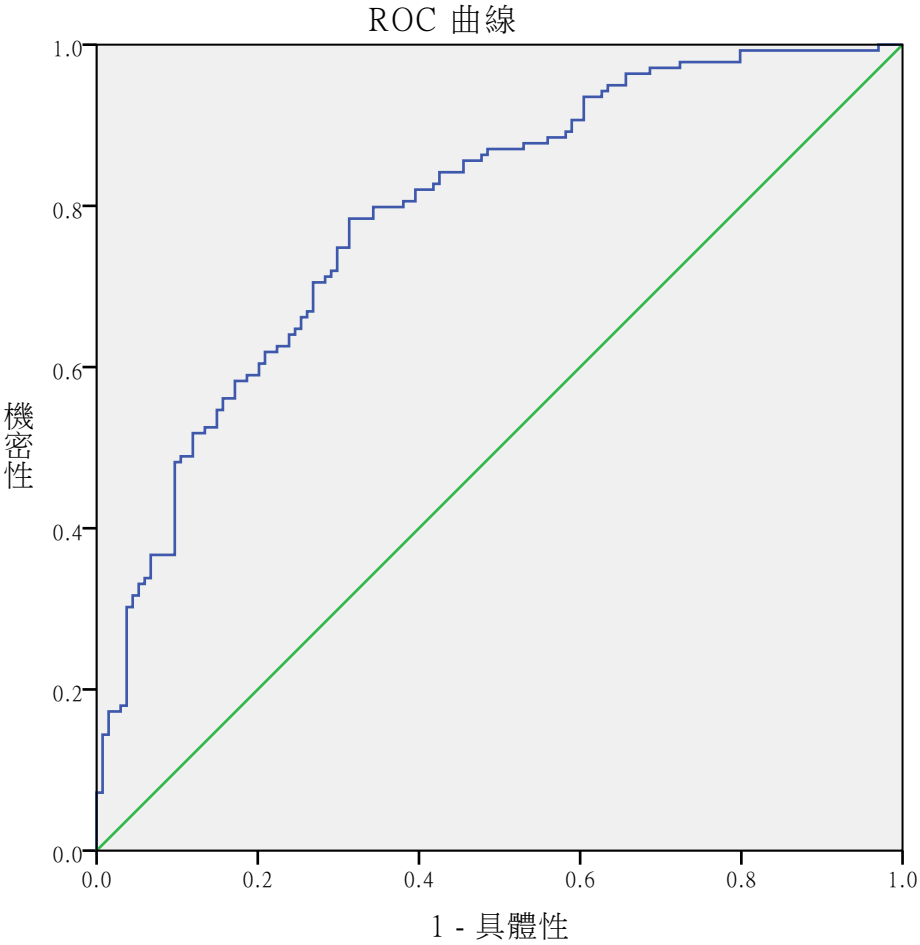

Supplement: Supplementary file 24 [file 15203375]

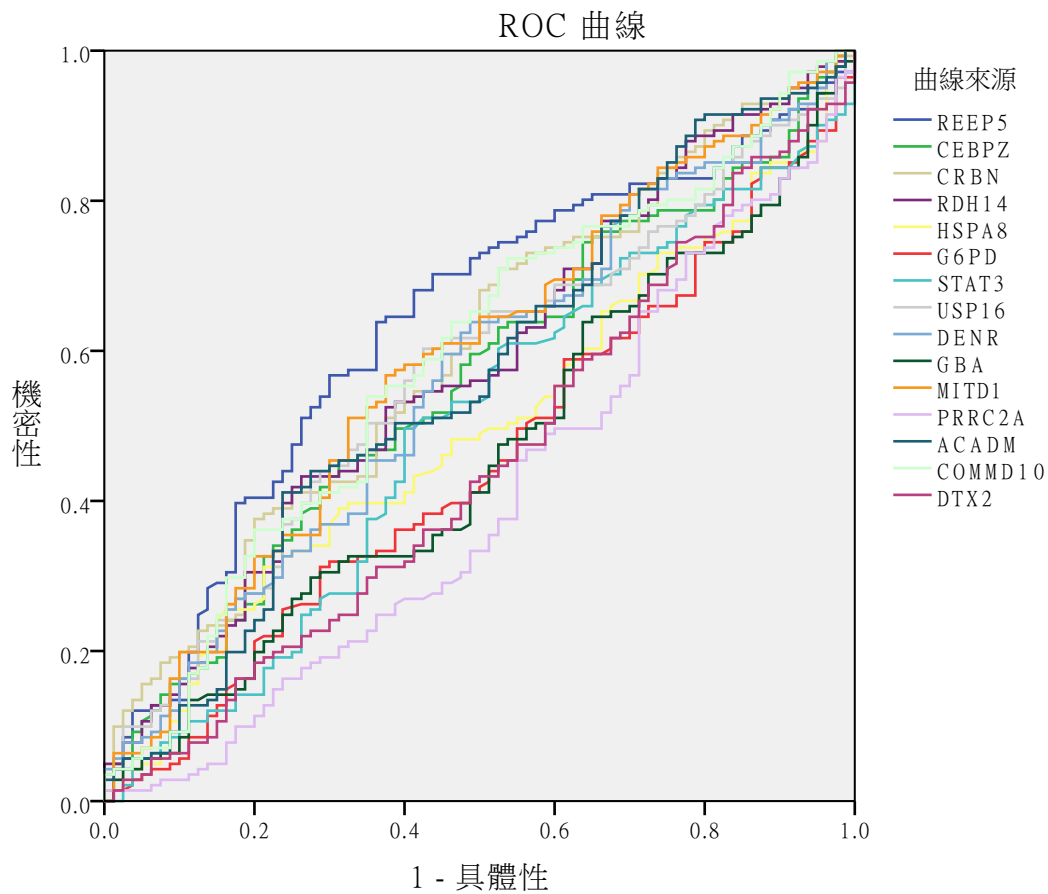

同分產生的對數區段。

Supplement: Supplementary file 25 [file 15203375]

**Module membership vs. gene significance**  
**cor=0.39, p=5.9e-66**

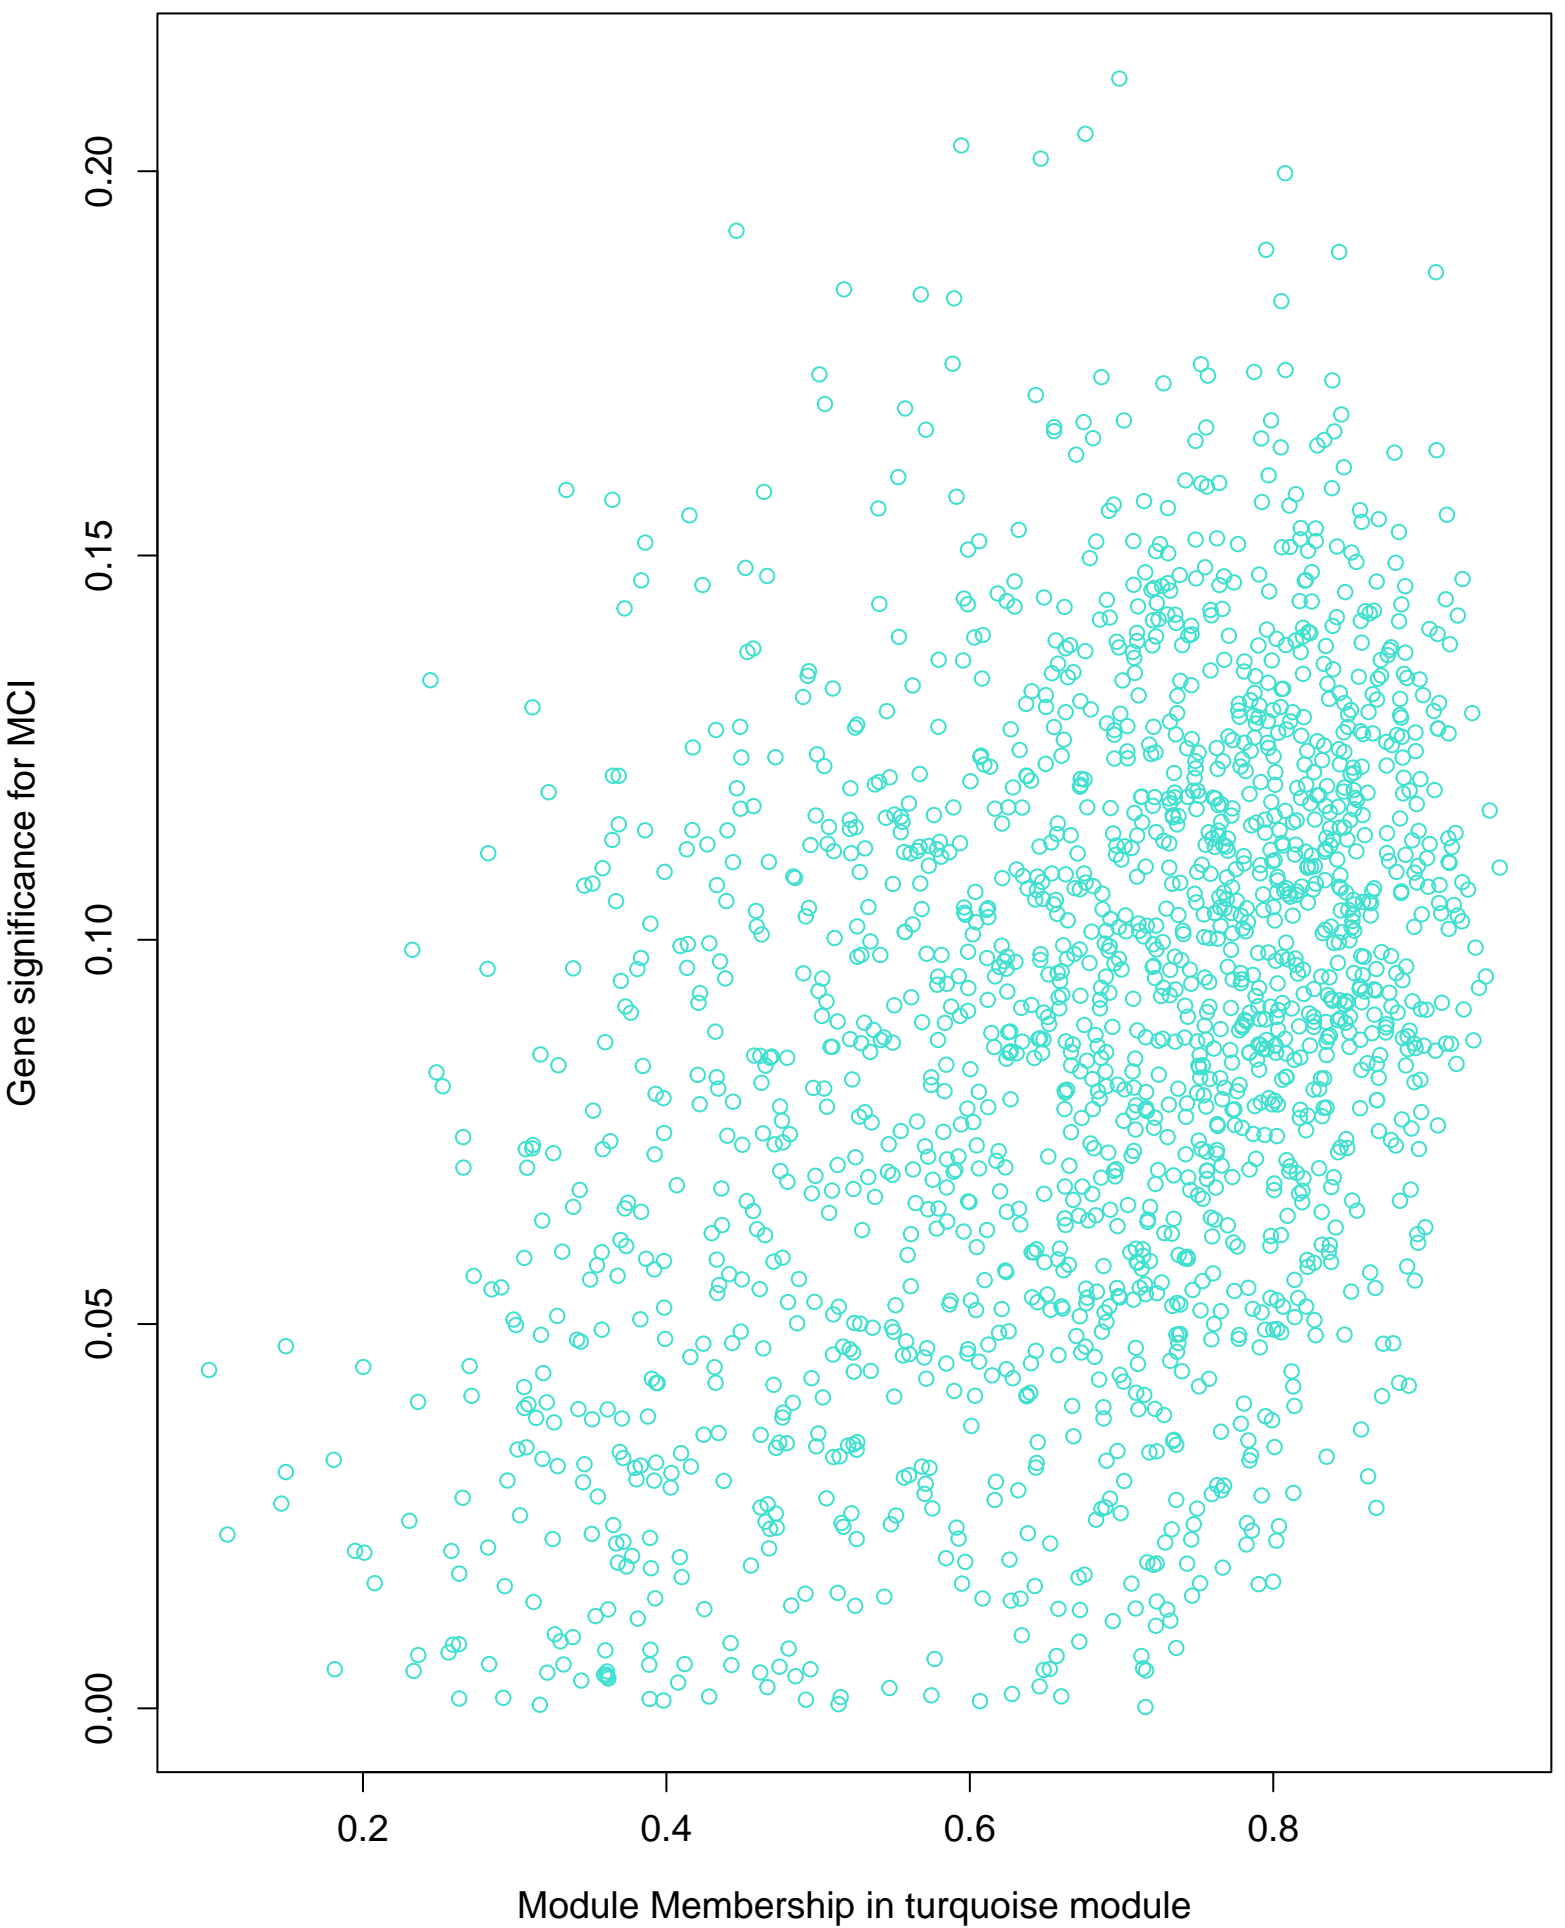

Supplement: Supplementary file 26 [file 15203375]

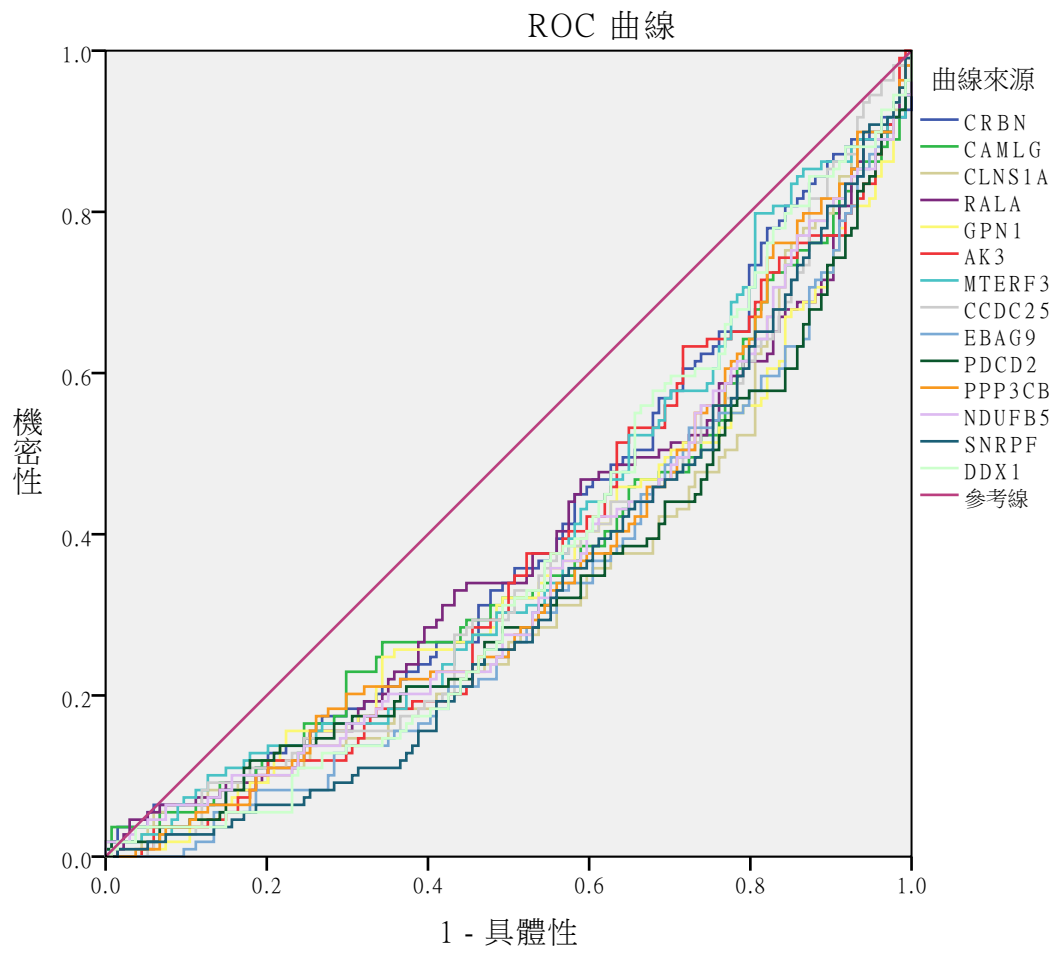

Supplement: Supplementary file 27 [file 15203375]

**Module membership vs. gene significance**  
**cor=0.16, p=4.3e-07**

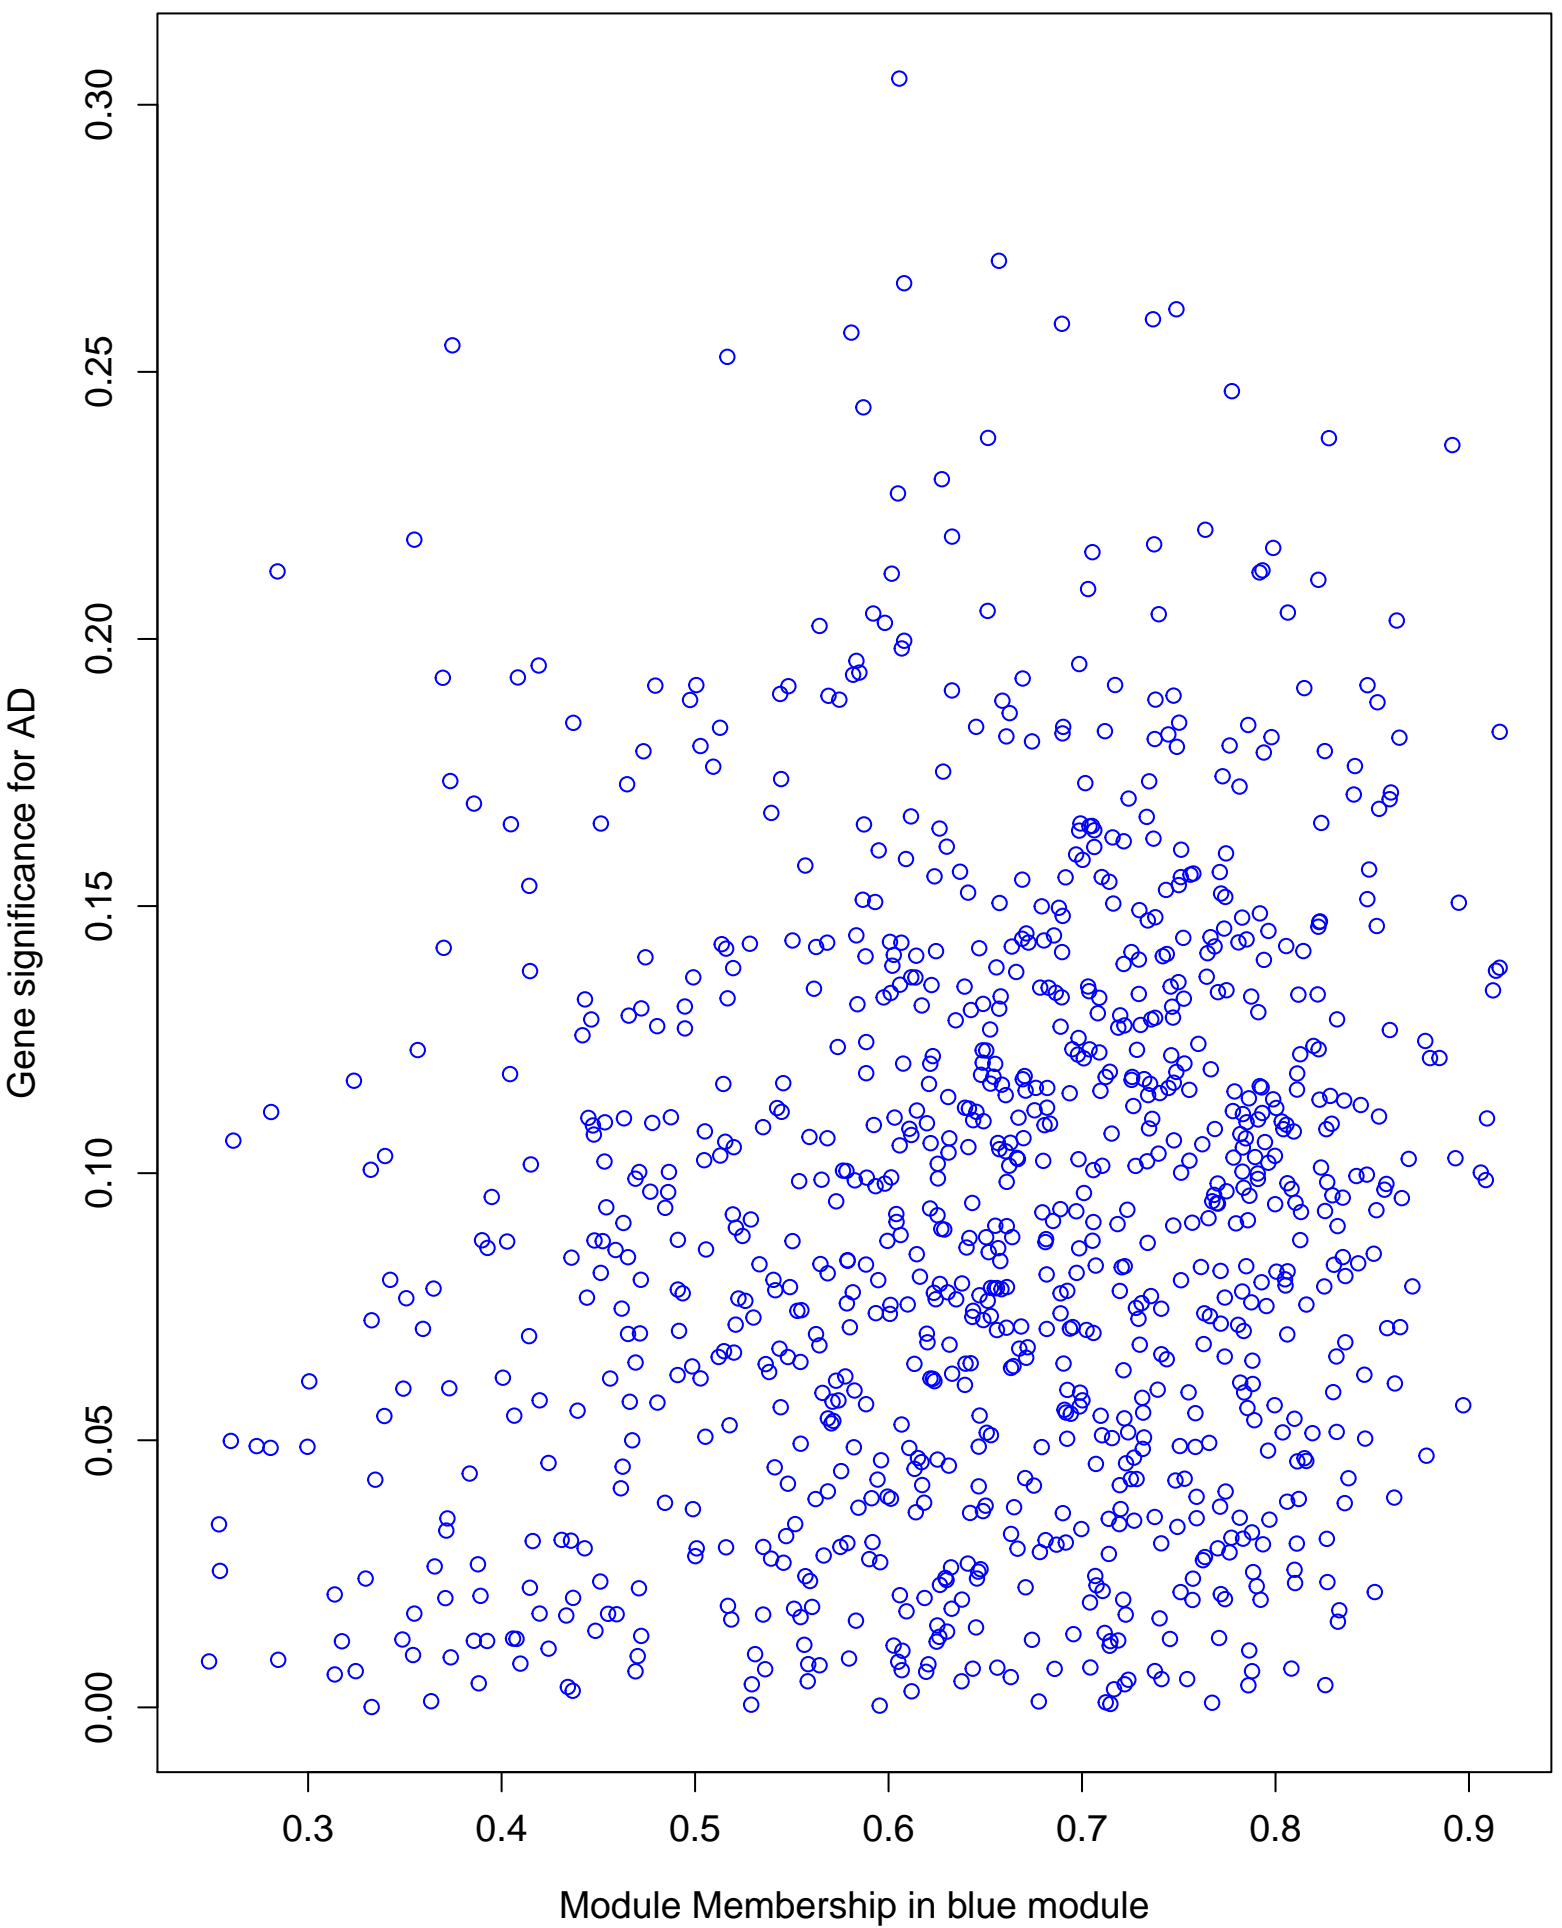

Supplement: Supplementary file 28 [file 15203375]

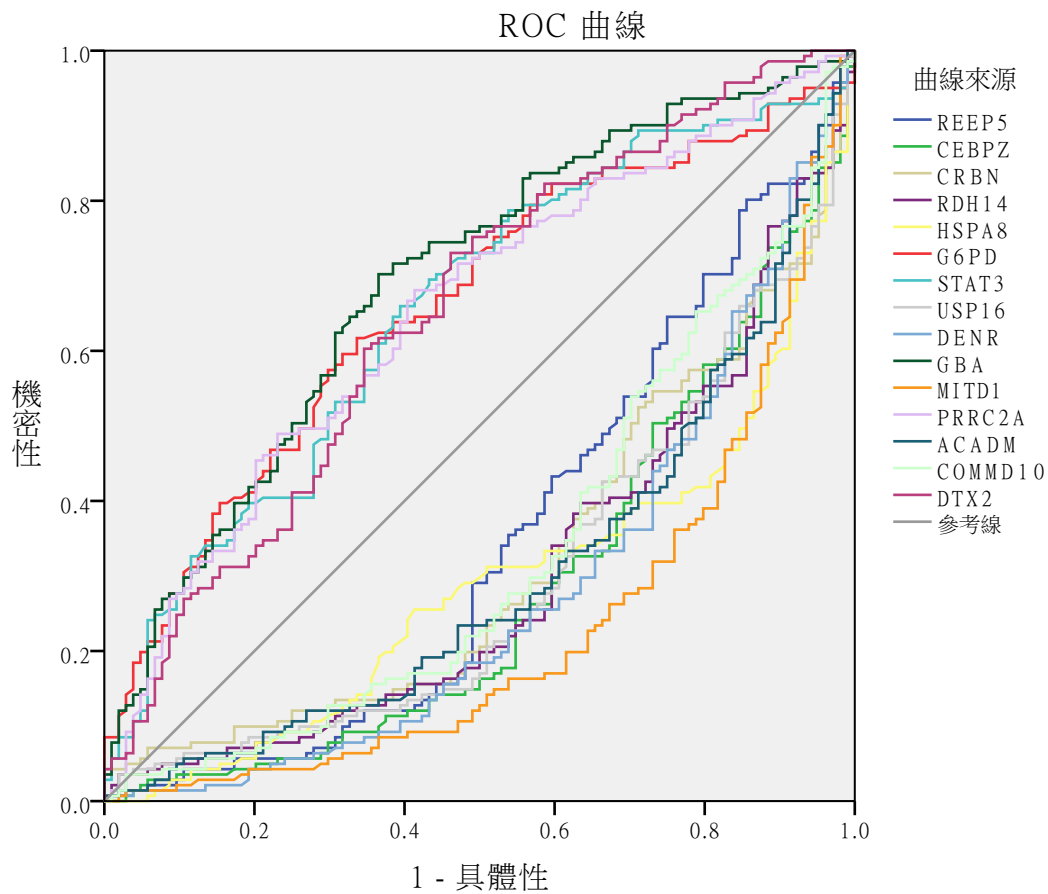

同分產生的對數區段。

Supplement: Supplementary file 29 [file 15203375]

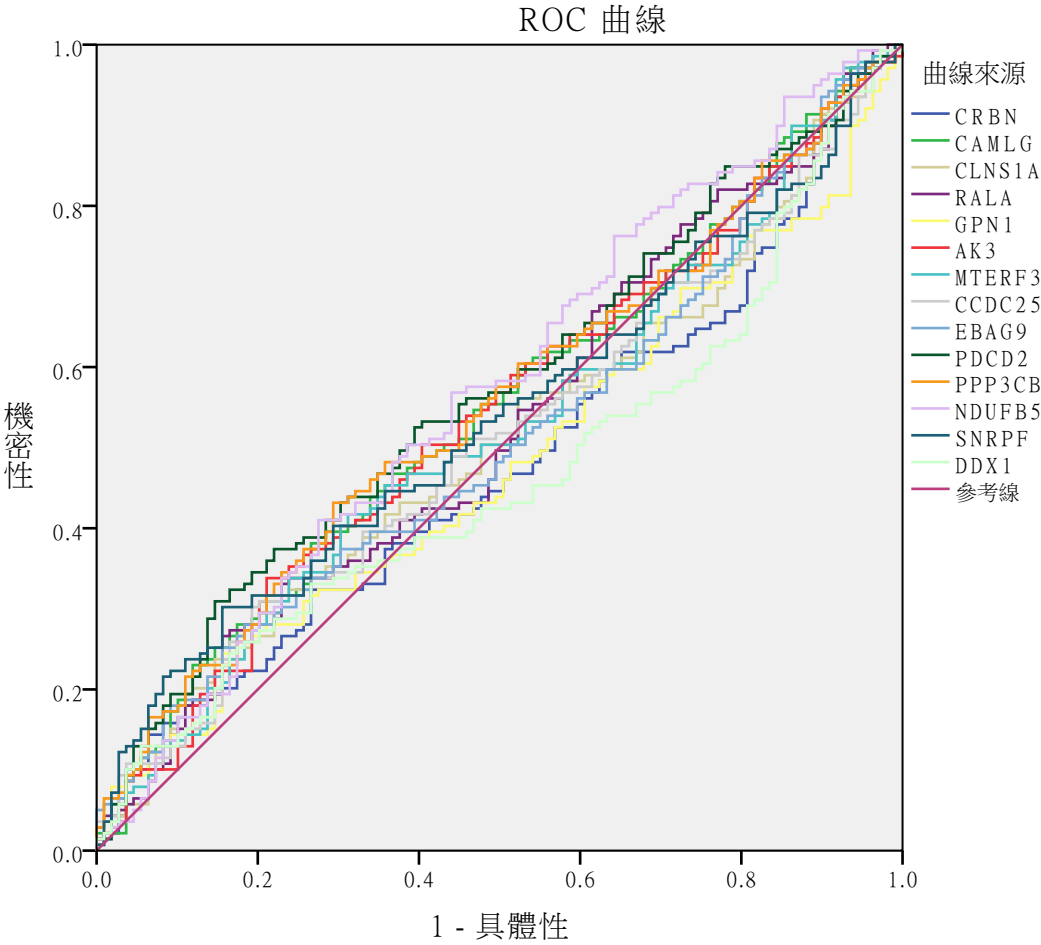

Supplement: Supplementary file 31 [file 15203375]

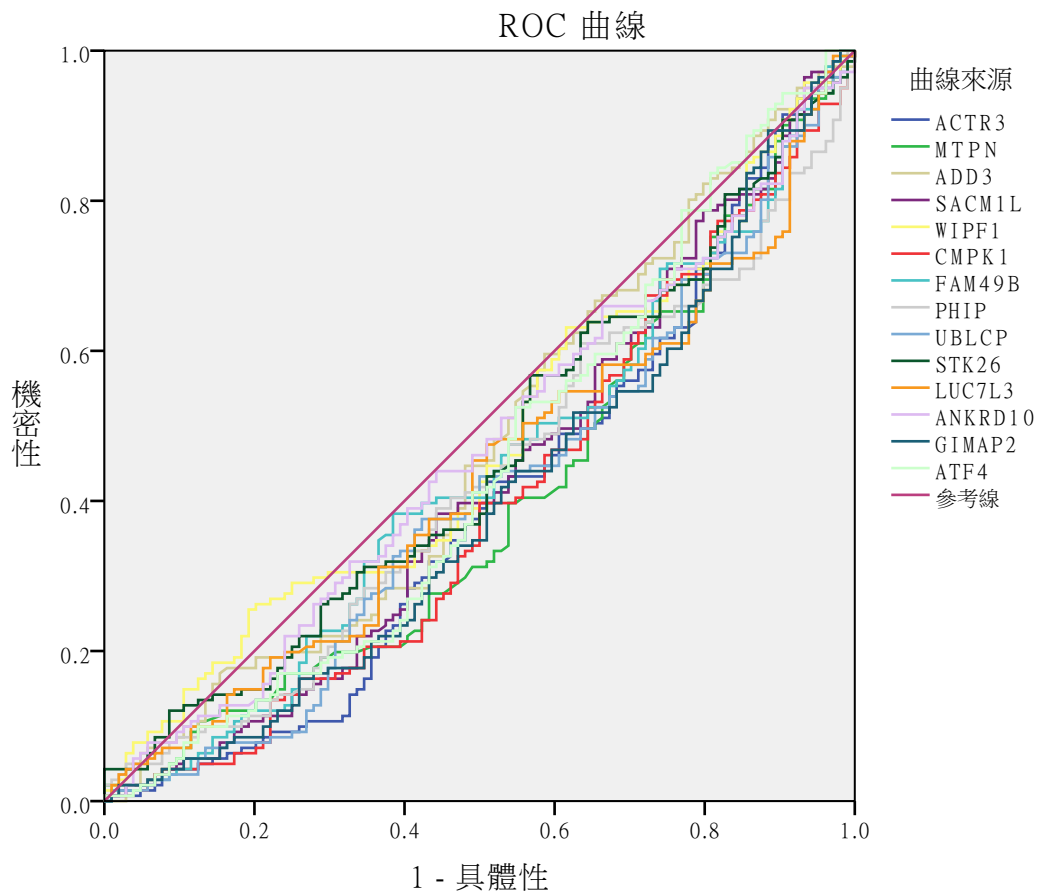

同分產生的對數區段。

Supplement: Supplementary file 32 [file 15203375]

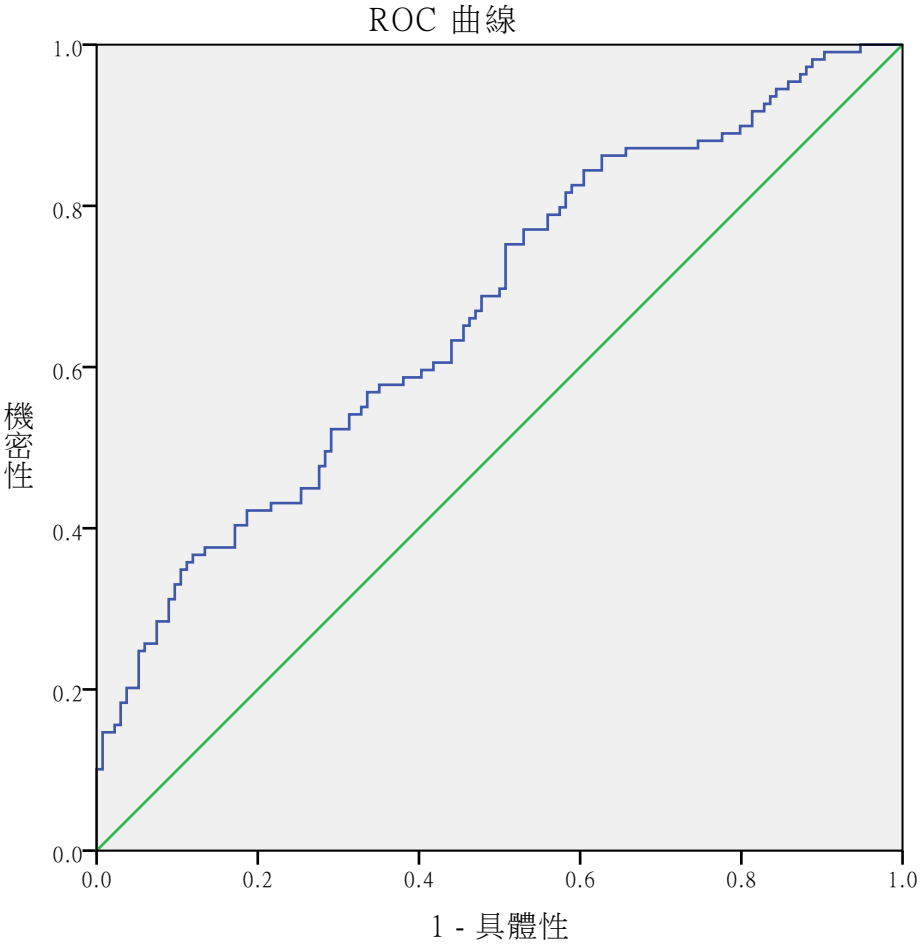

Supplement: Supplementary file 33 [file 15203375]

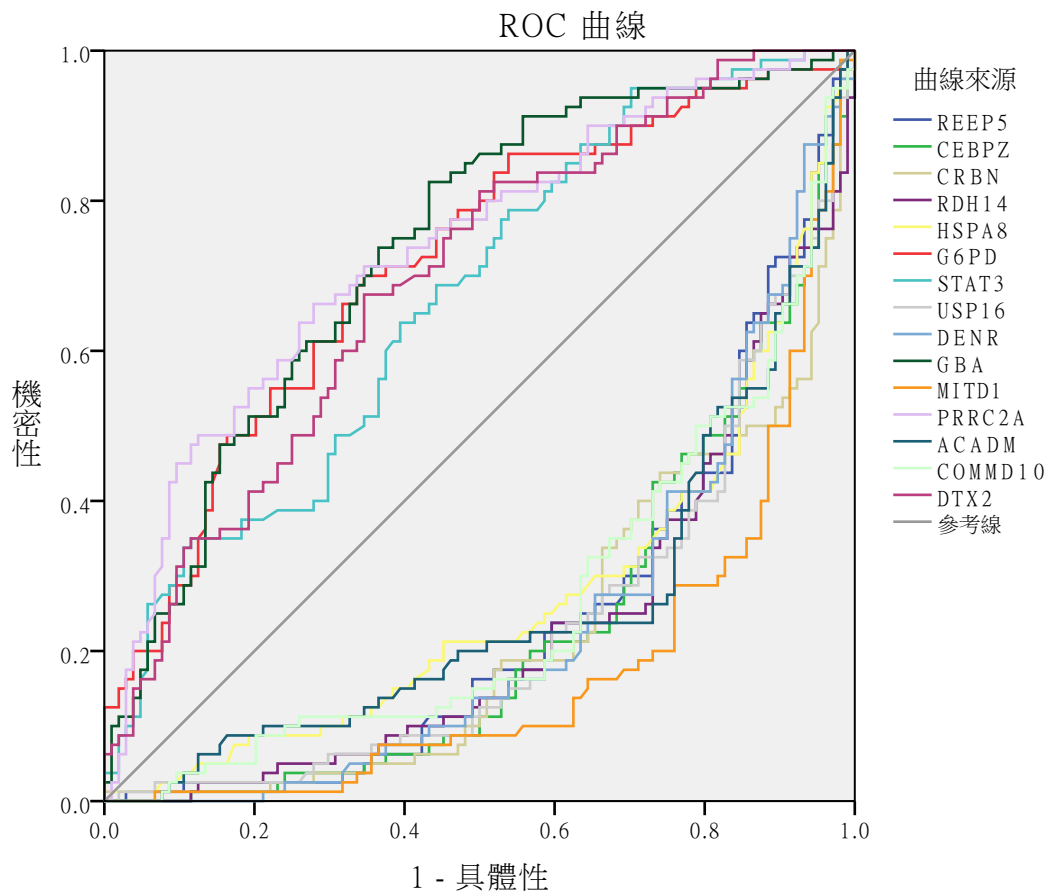

同分產生的對數區段。

Supplement: Supplementary file 38 [file 15203375]

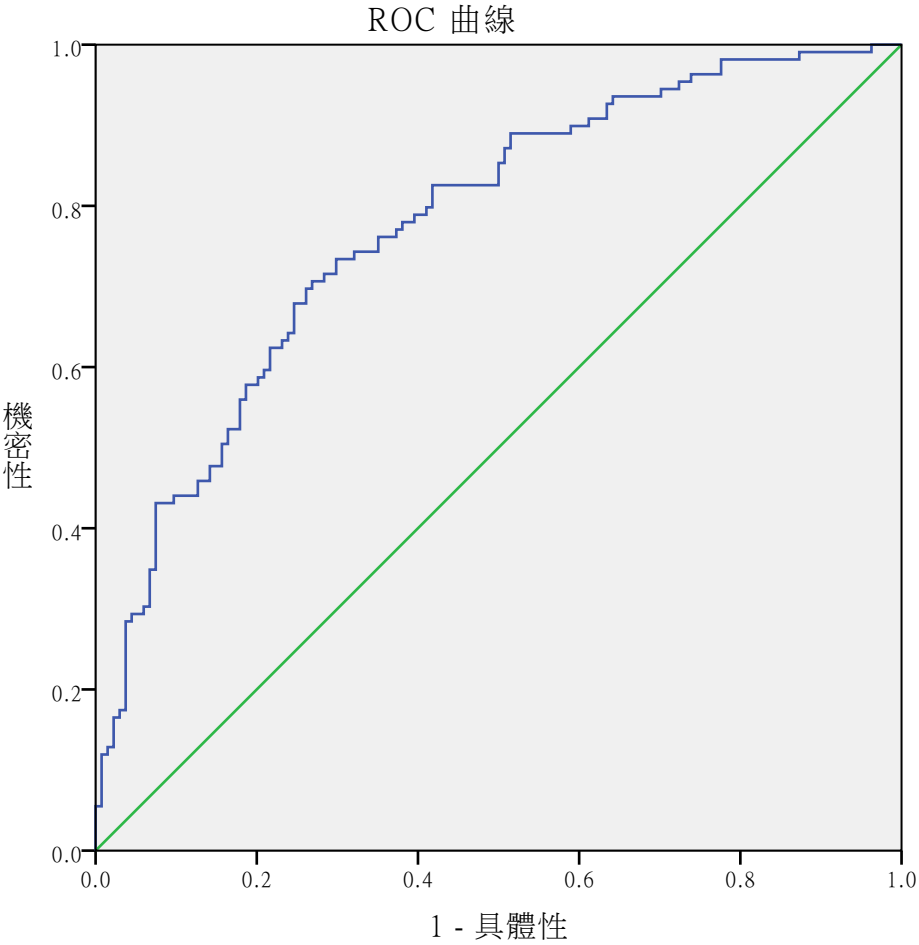

Supplement: Supplementary file 39 [file 15203375]

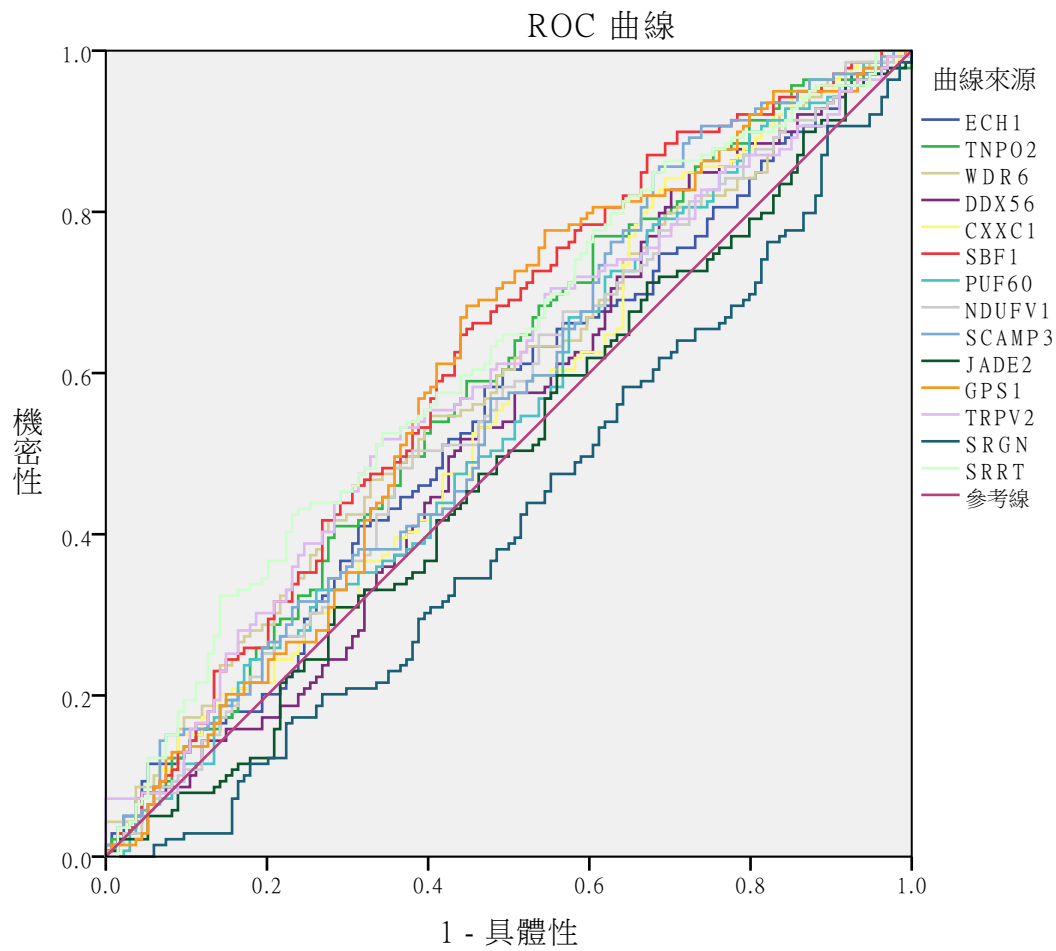

Supplement: Supplementary file 42 [file 15203375]

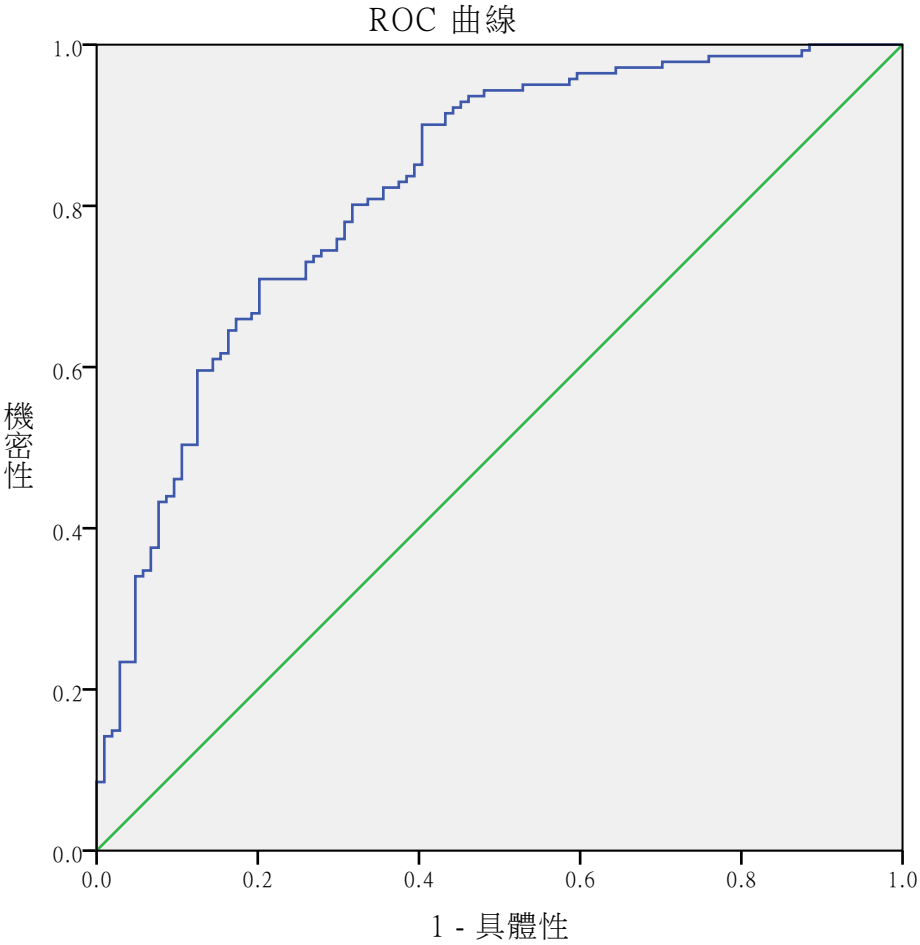

Supplement: Supplementary file 43 [file 15203375]

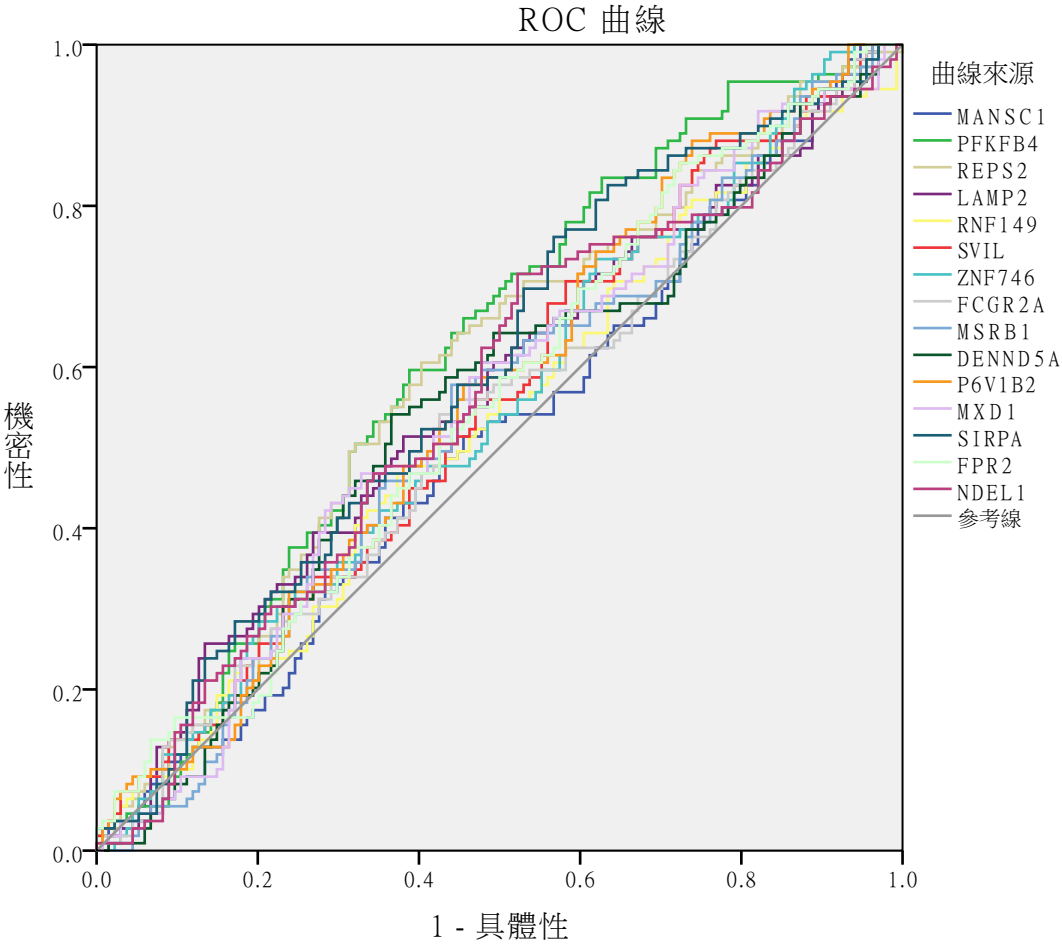

Supplement: Supplementary file 44 [file 15203375]

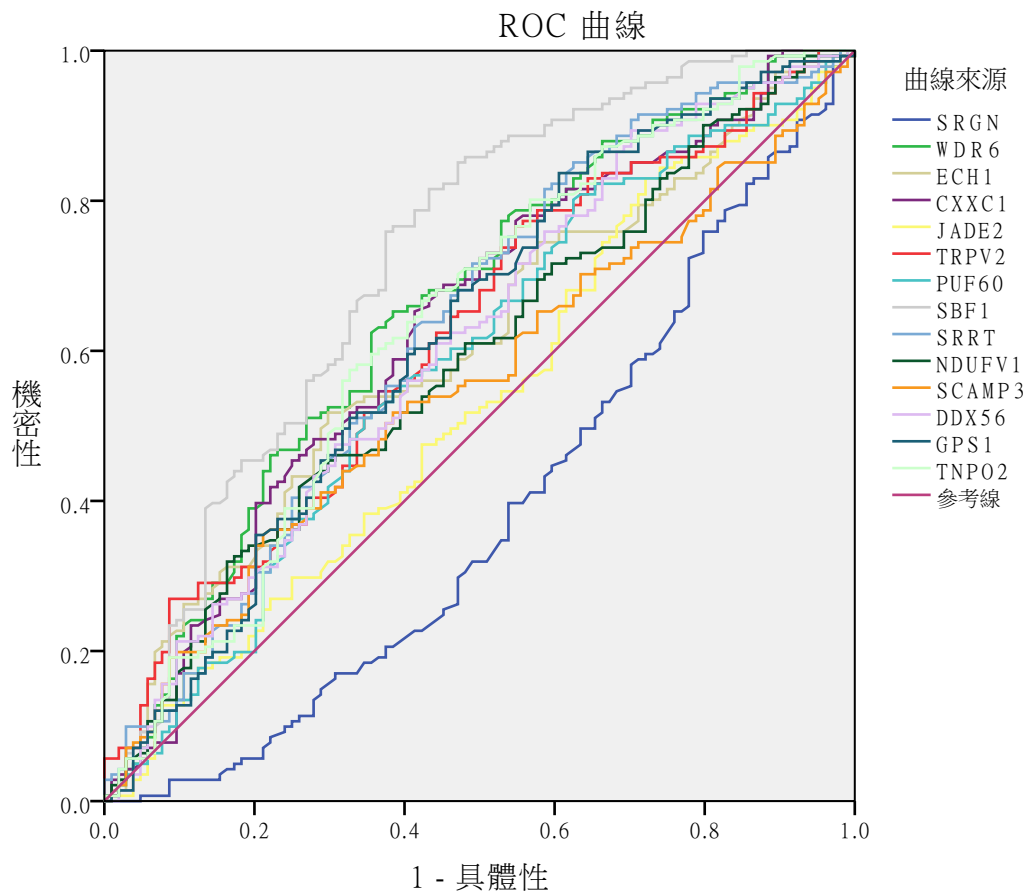

同分產生的對數區段。

Supplement: Supplementary file 48 [file 15203375]

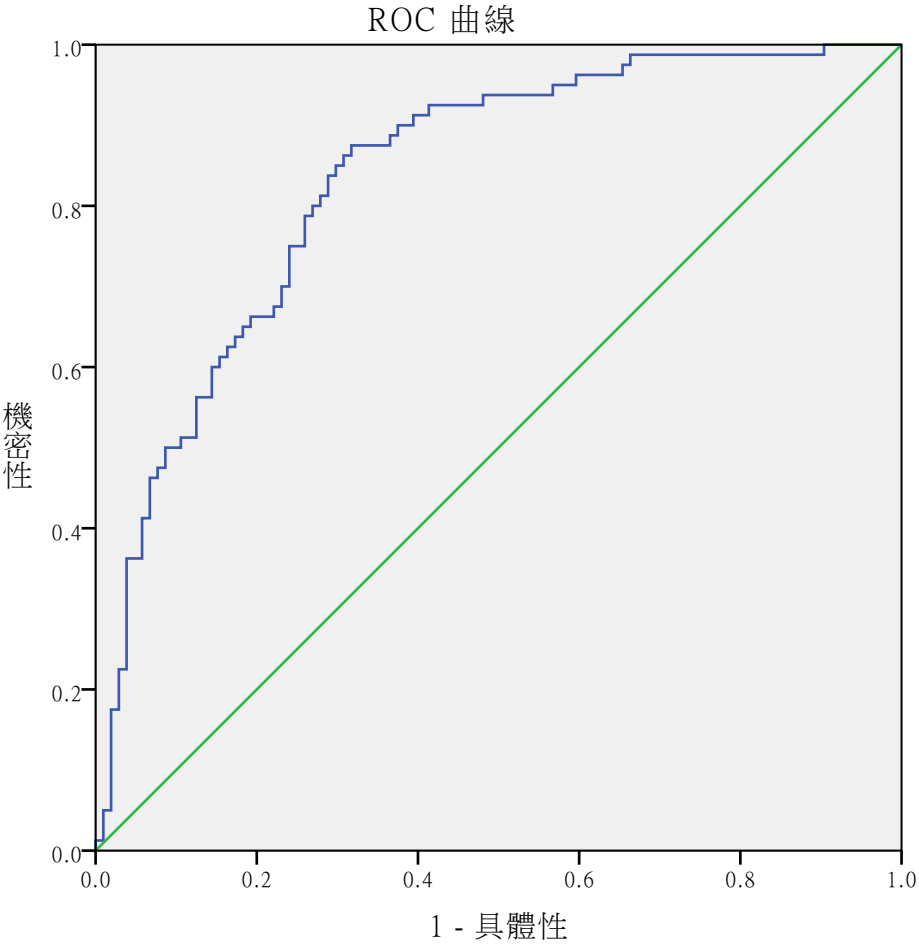

Supplement: Supplementary file 51 [file 15203375]

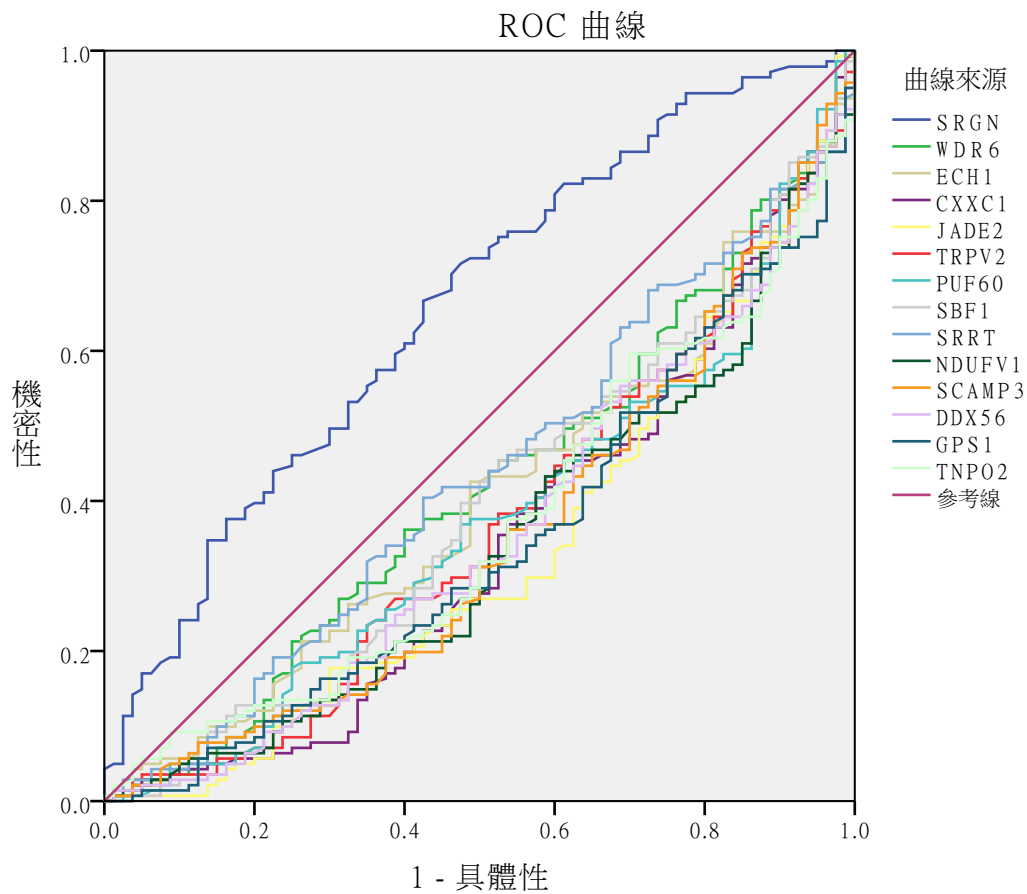

同分產生的對數區段。

Supplement: Supplementary file 52 [file 15203375]

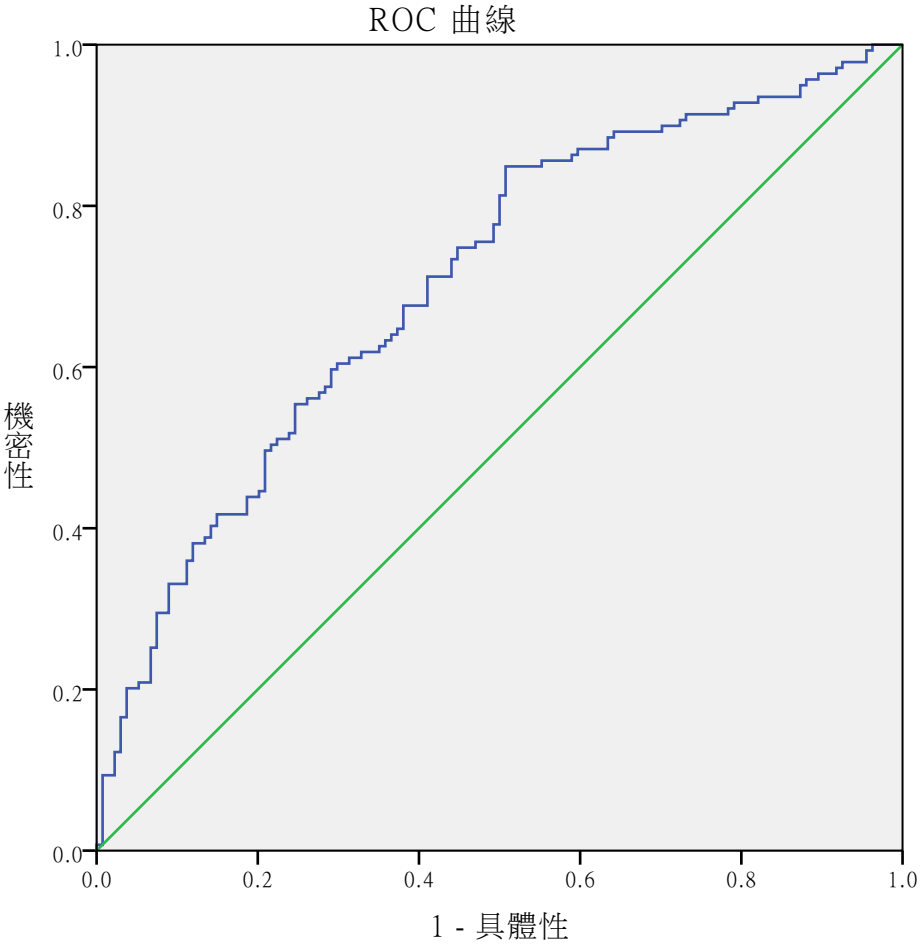

Supplement: Supplementary file 57 [file 15203375]

**Module membership vs. gene significance**  
**cor=0.19, p=0.016**

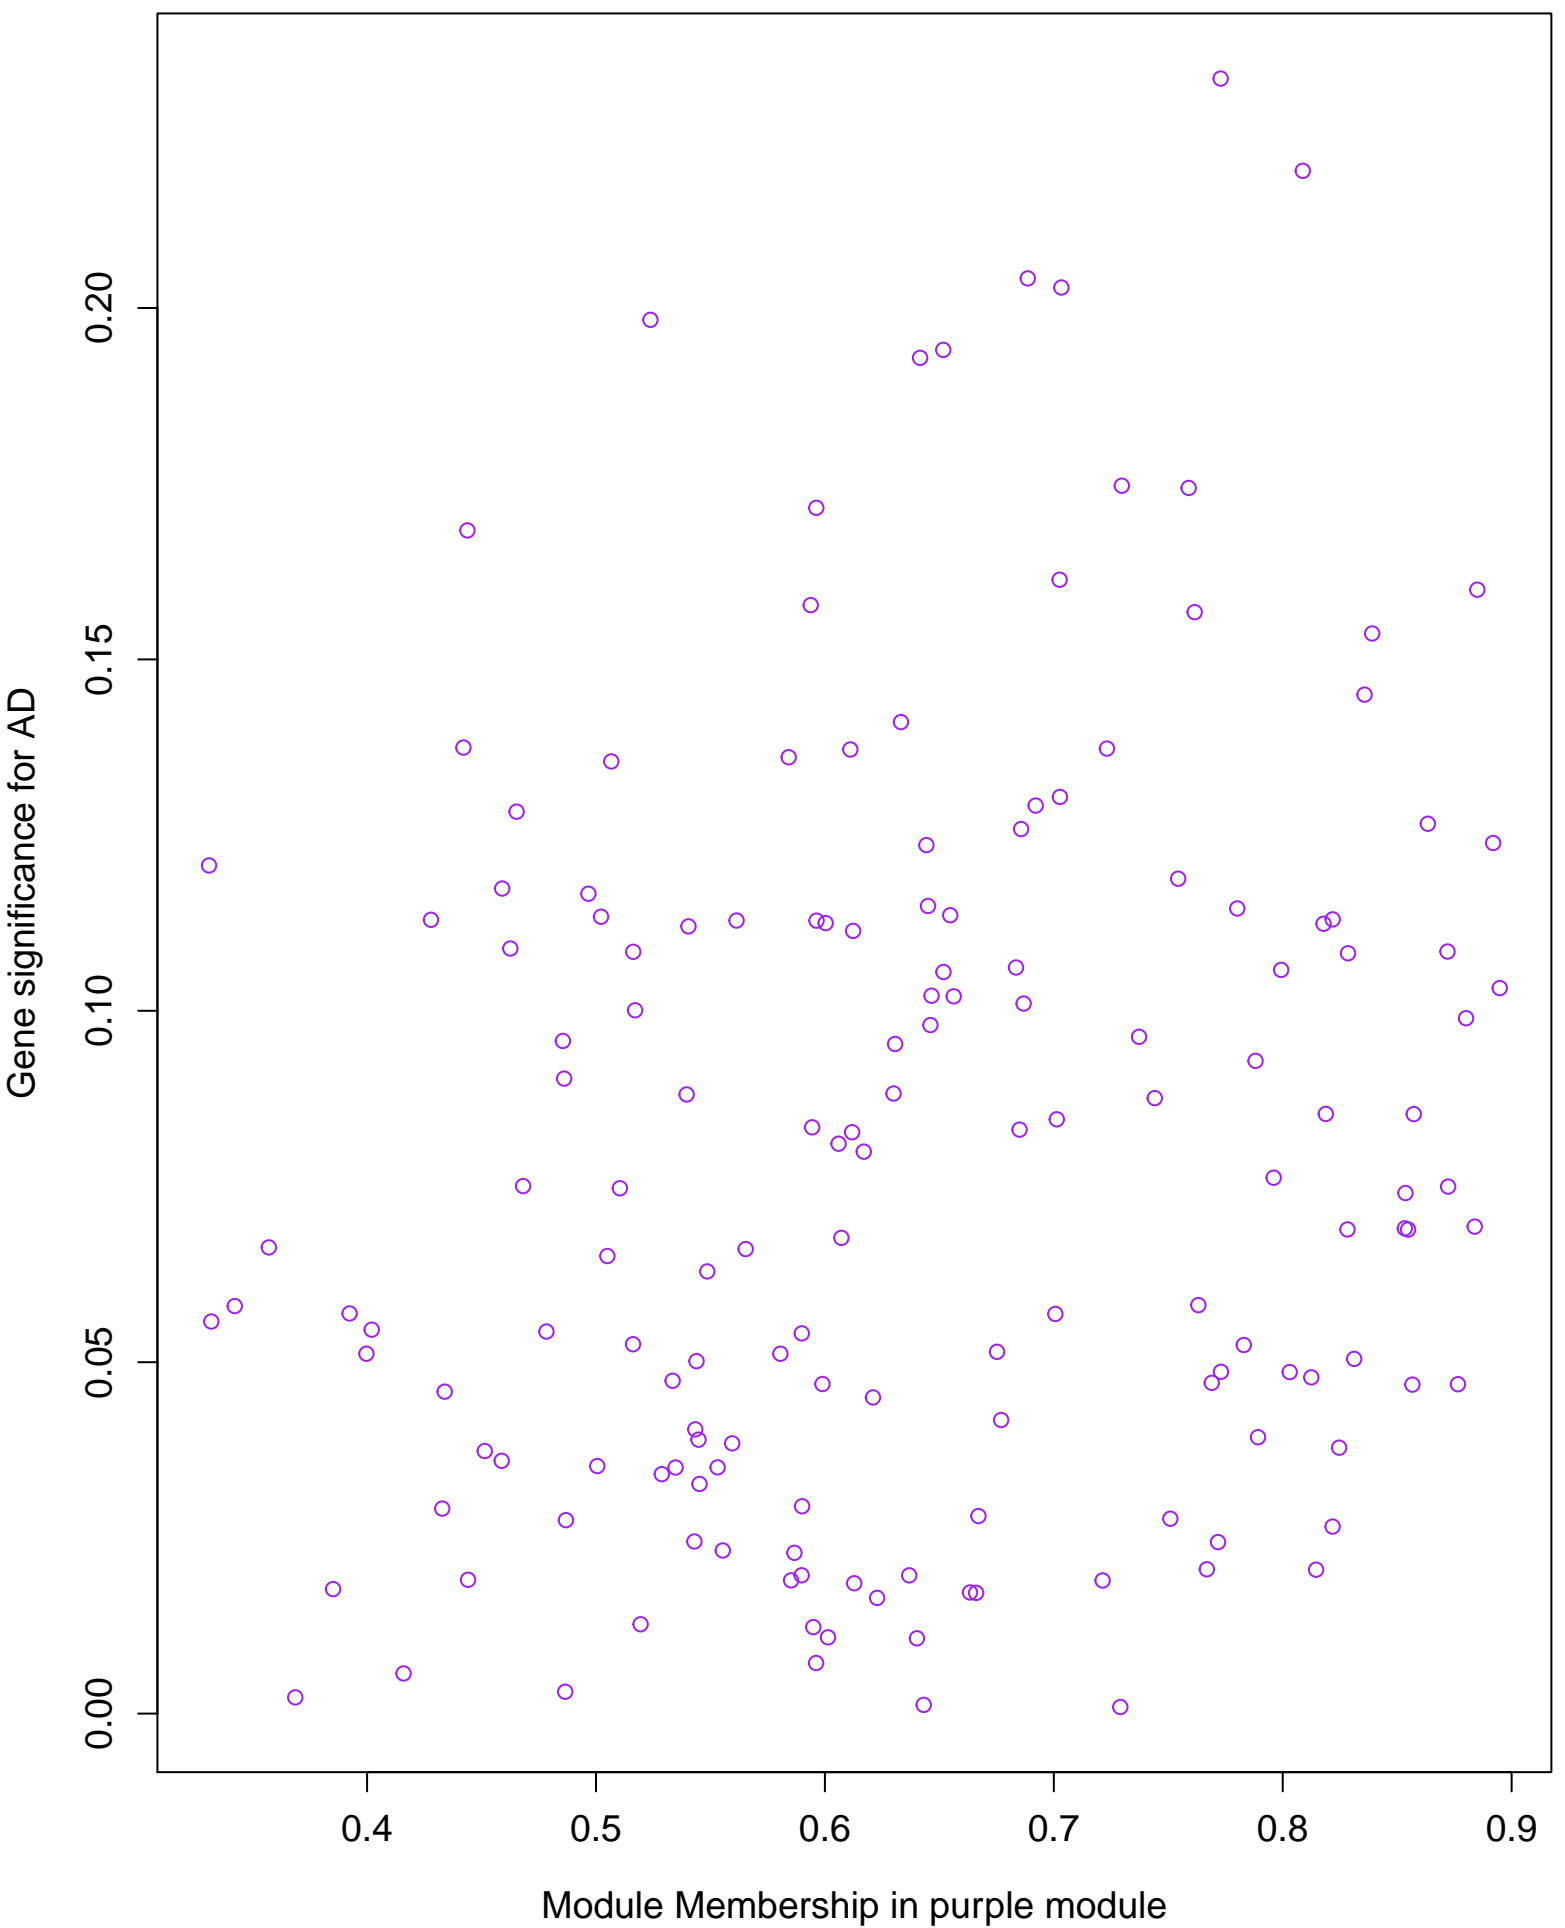

Supplement: Supplementary file 62 [file 15203375]

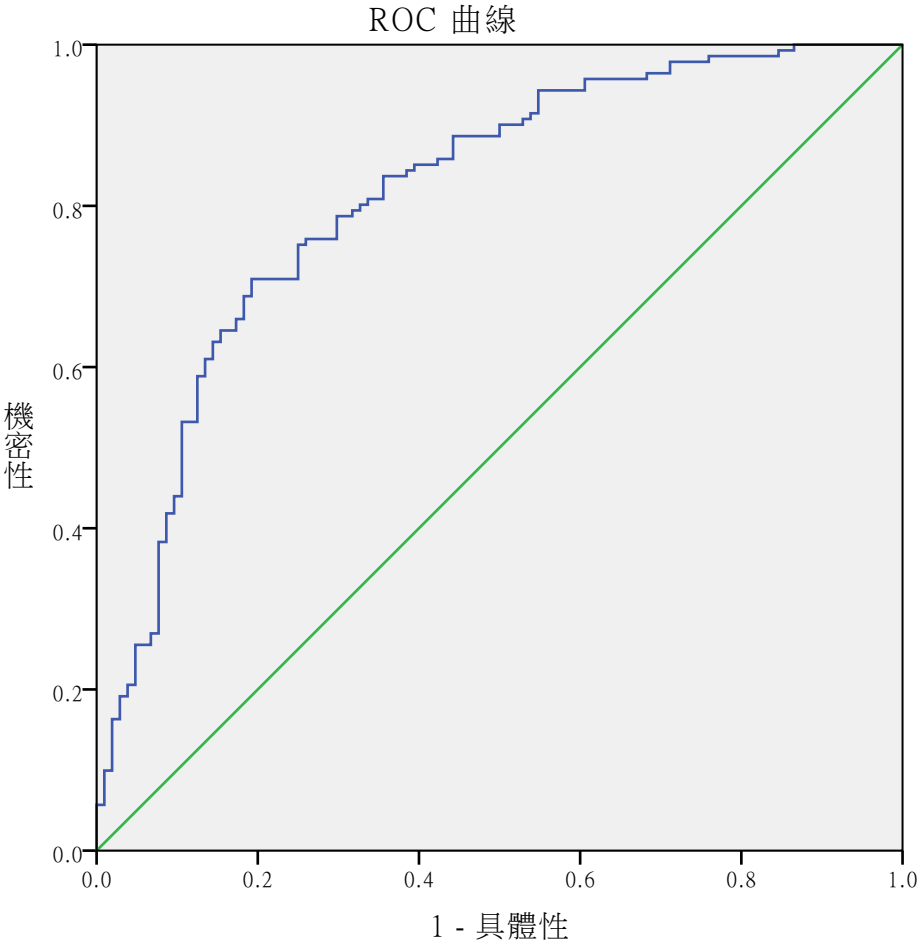

Supplement: Supplementary file 63 [file 15203375]

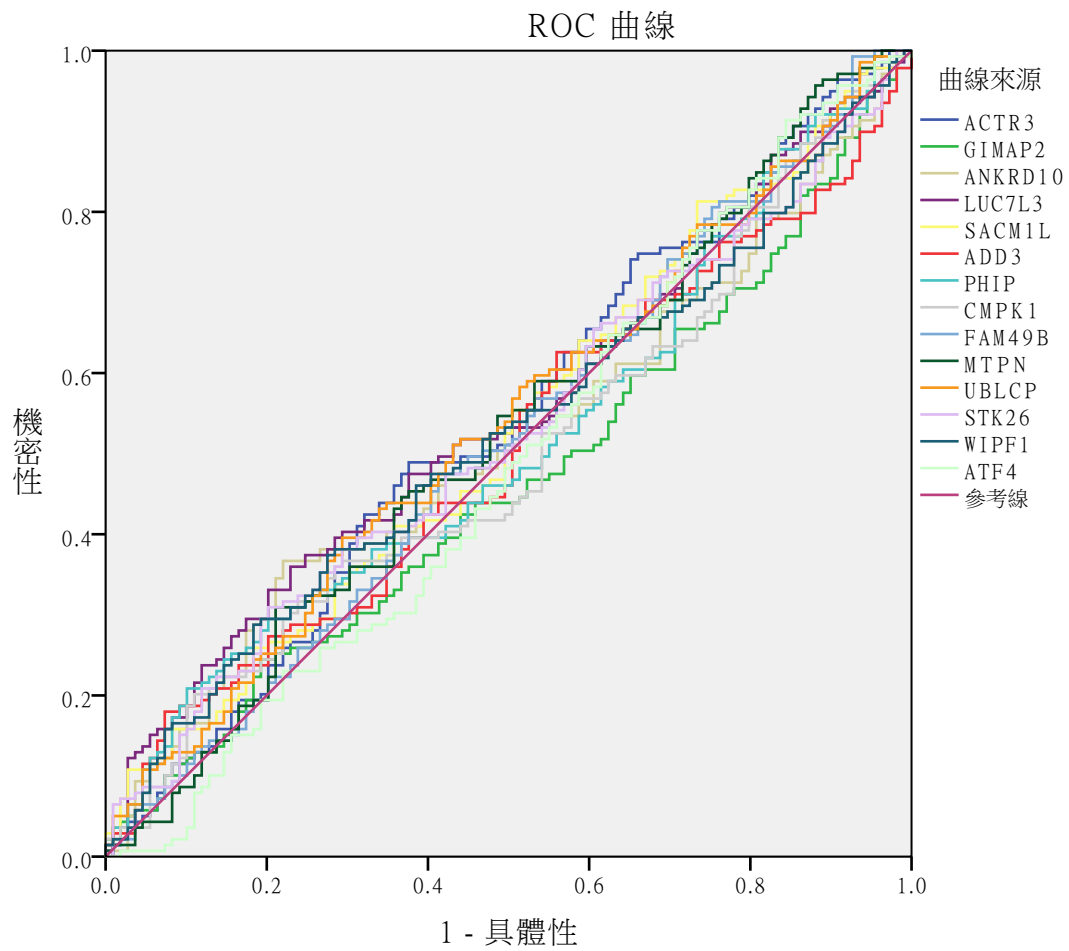

Supplement: Supplementary file 66 [file 15203375]

**Module membership vs. gene significance**  
**cor=0.21, p=4.7e-07**

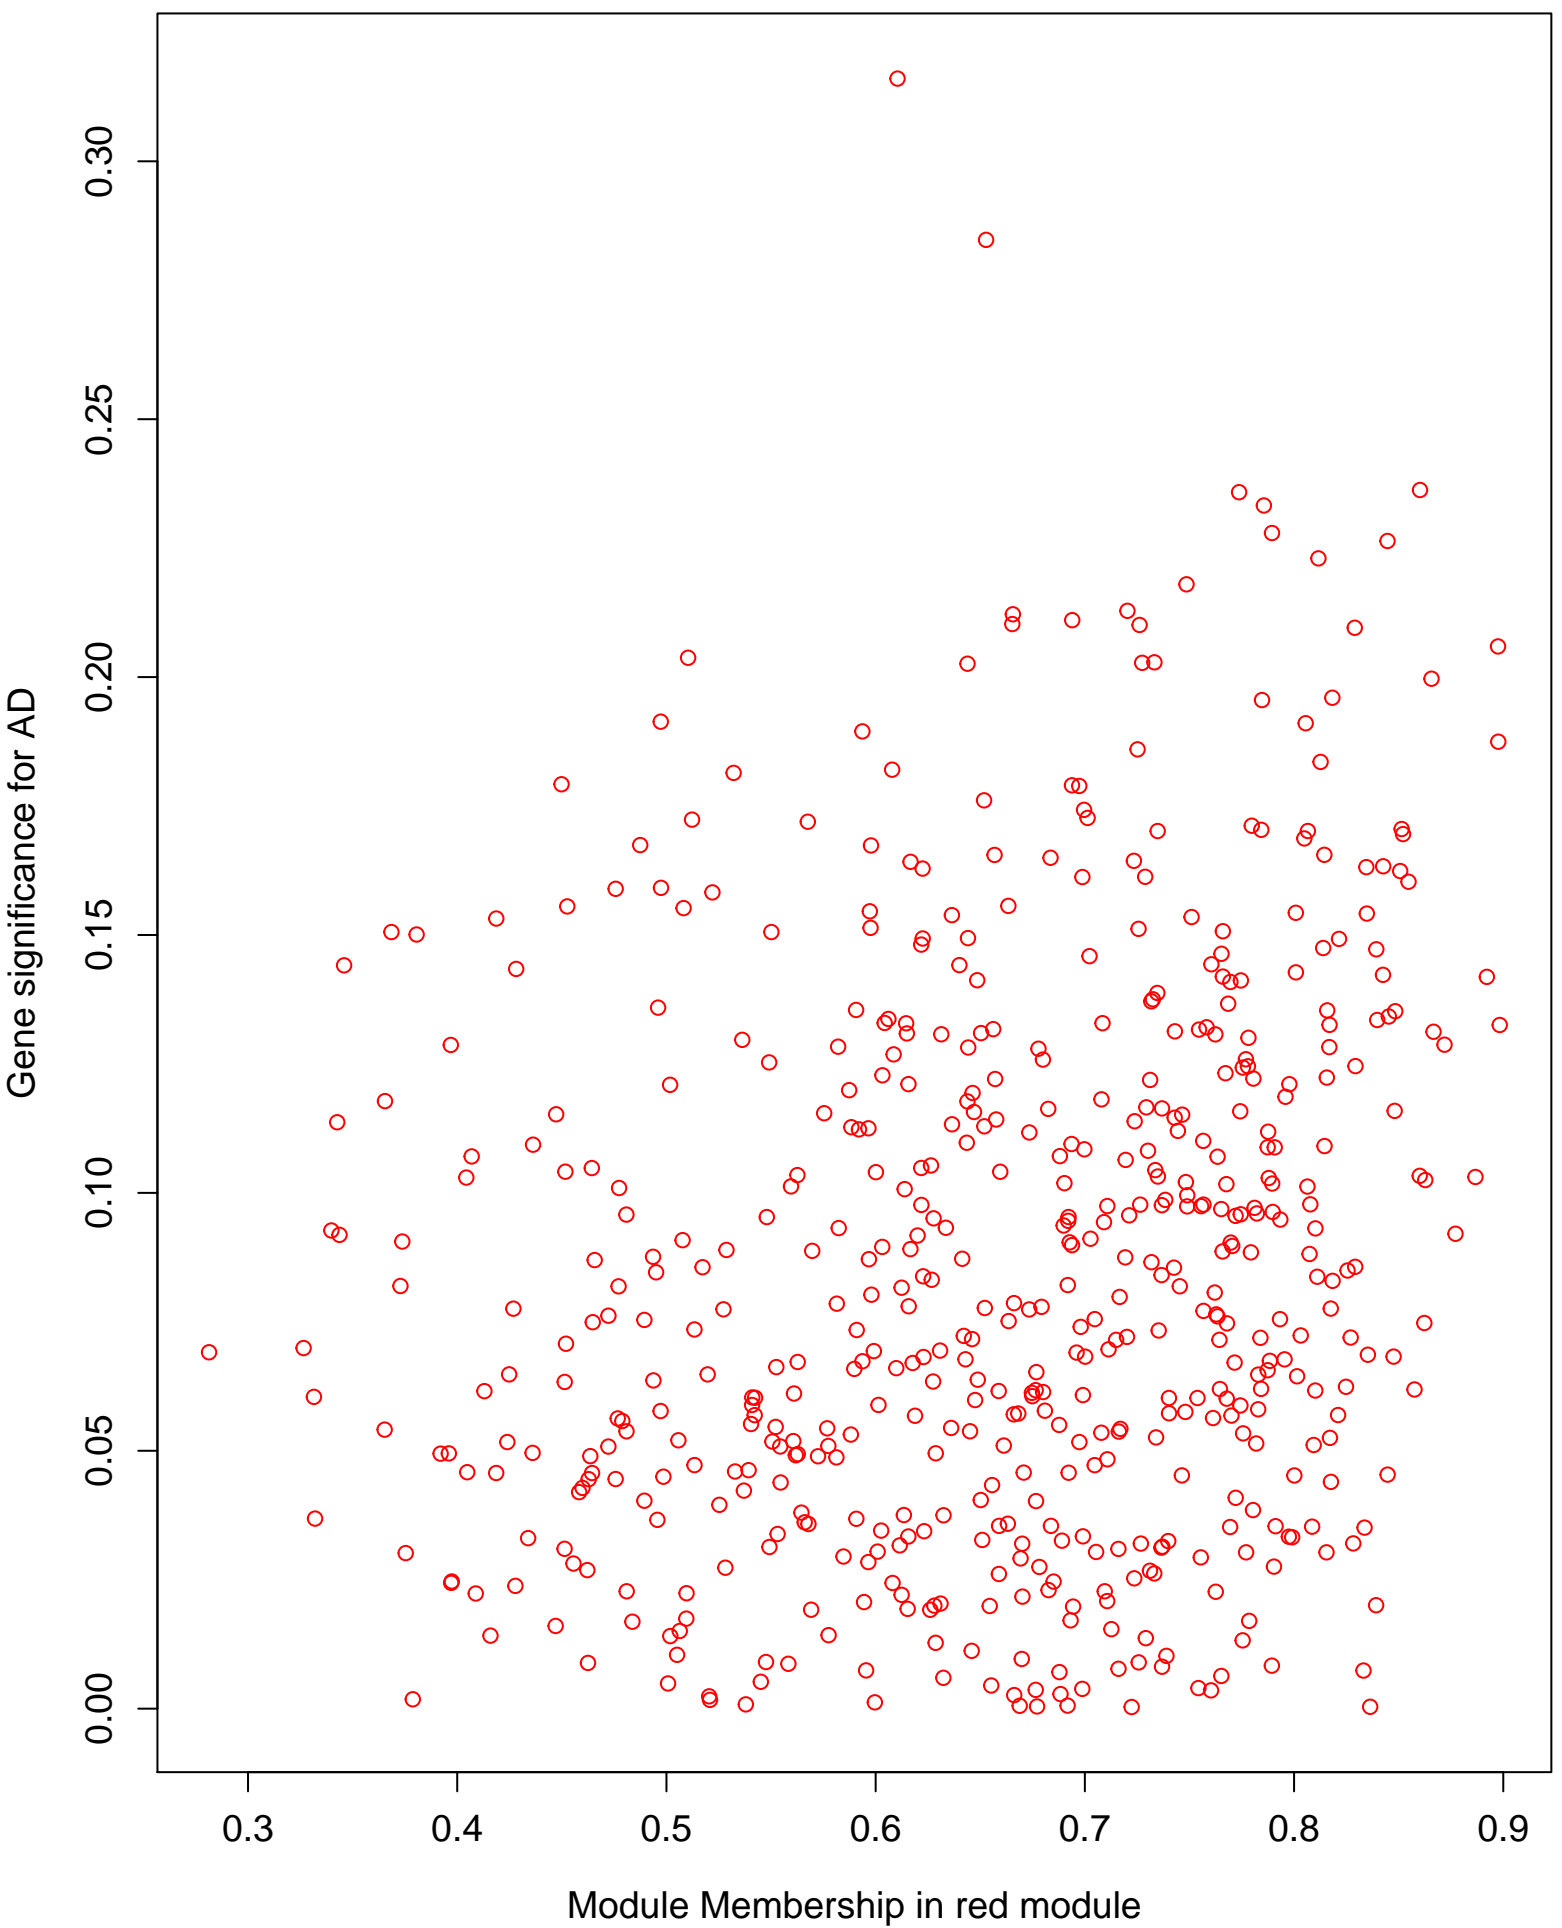

Supplement: Supplementary file 67 [file 15203375]

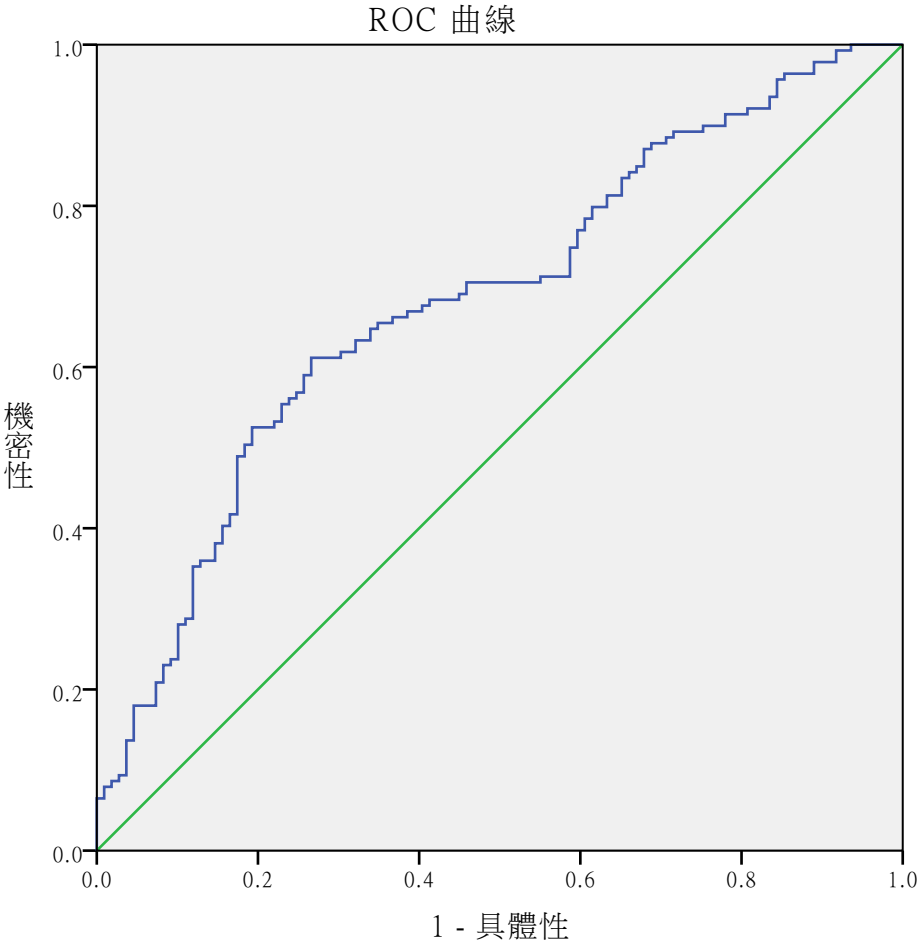

Supplement: Supplementary file 69 [file 15203375]

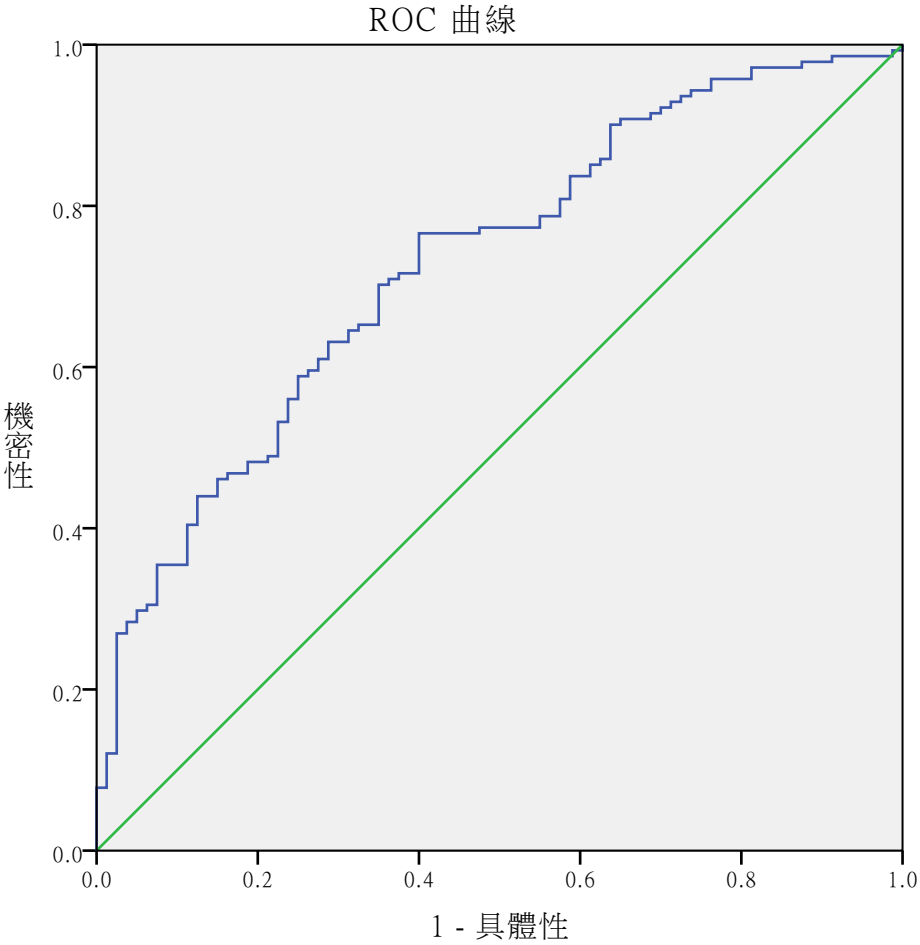

Supplement: Supplementary file 73 [file 15203375]

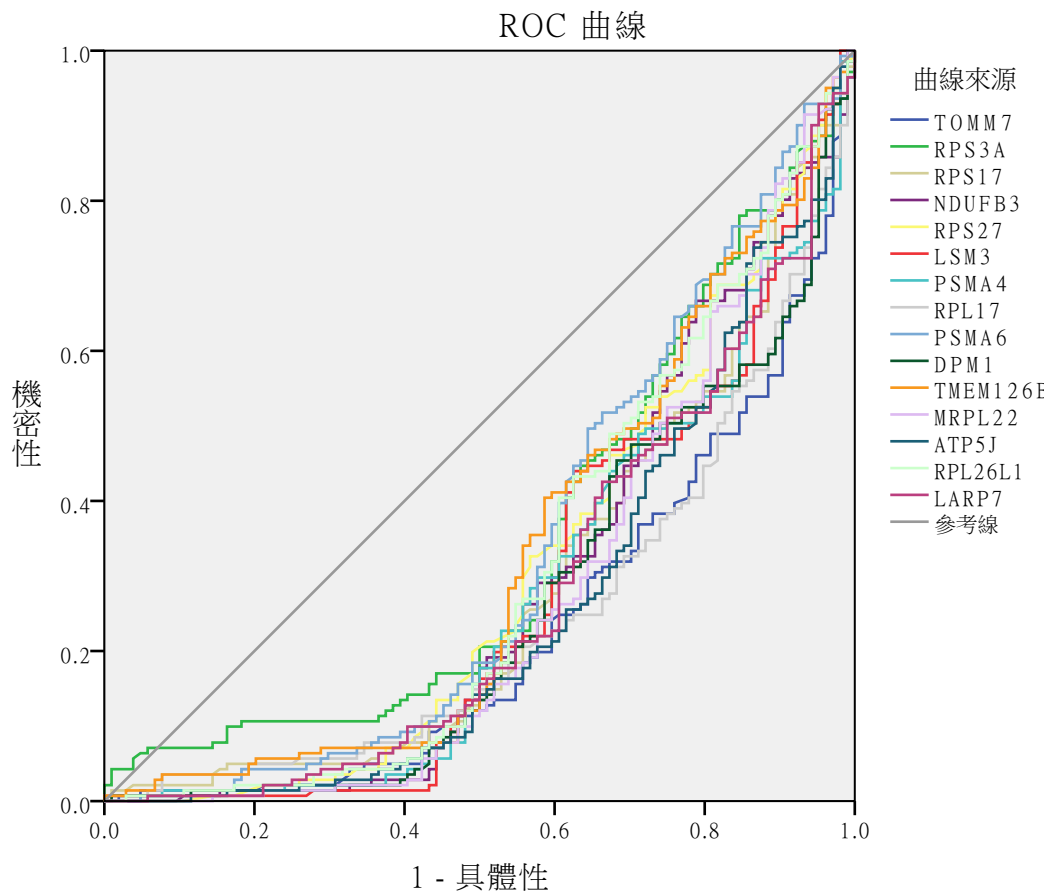

同分產生的對數區段。

Supplement: Supplementary file 74 [file 15203375]

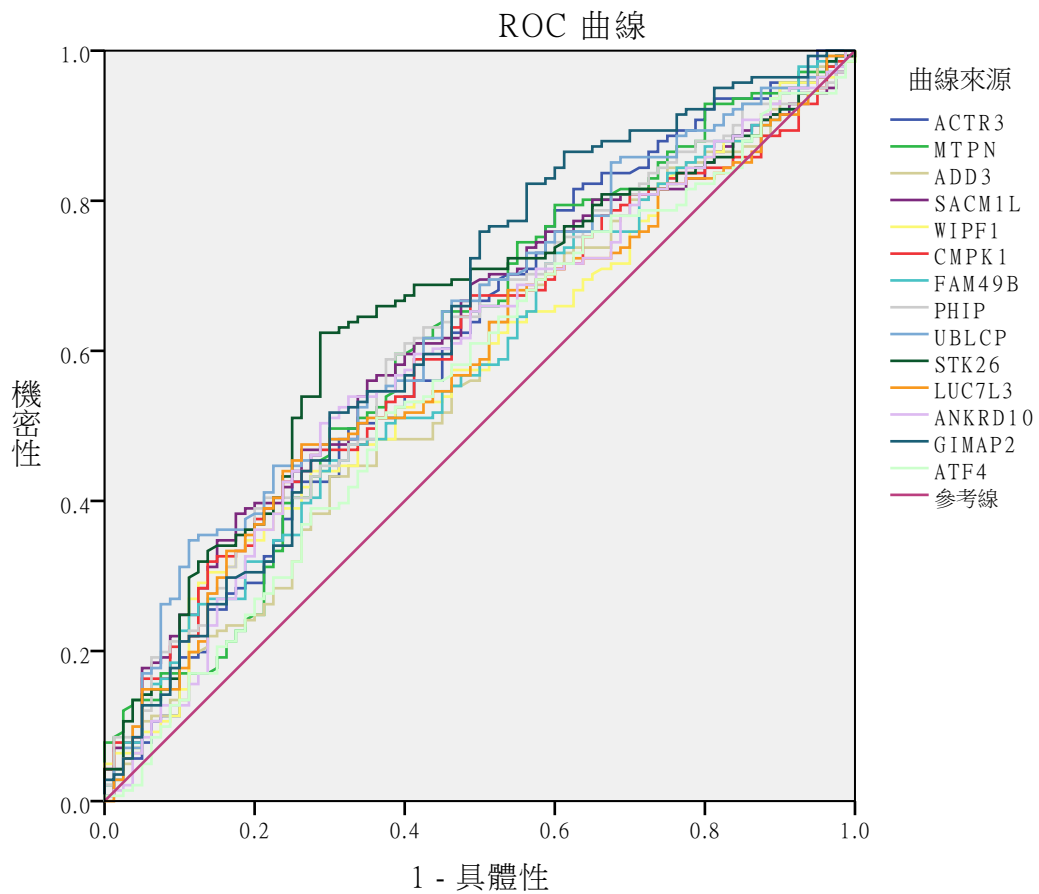

同分產生的對數區段。

Supplement: Supplementary file 78 [file 15203375]

**Module membership vs. gene significance**  
**cor=0.5, p=1.6e-16**

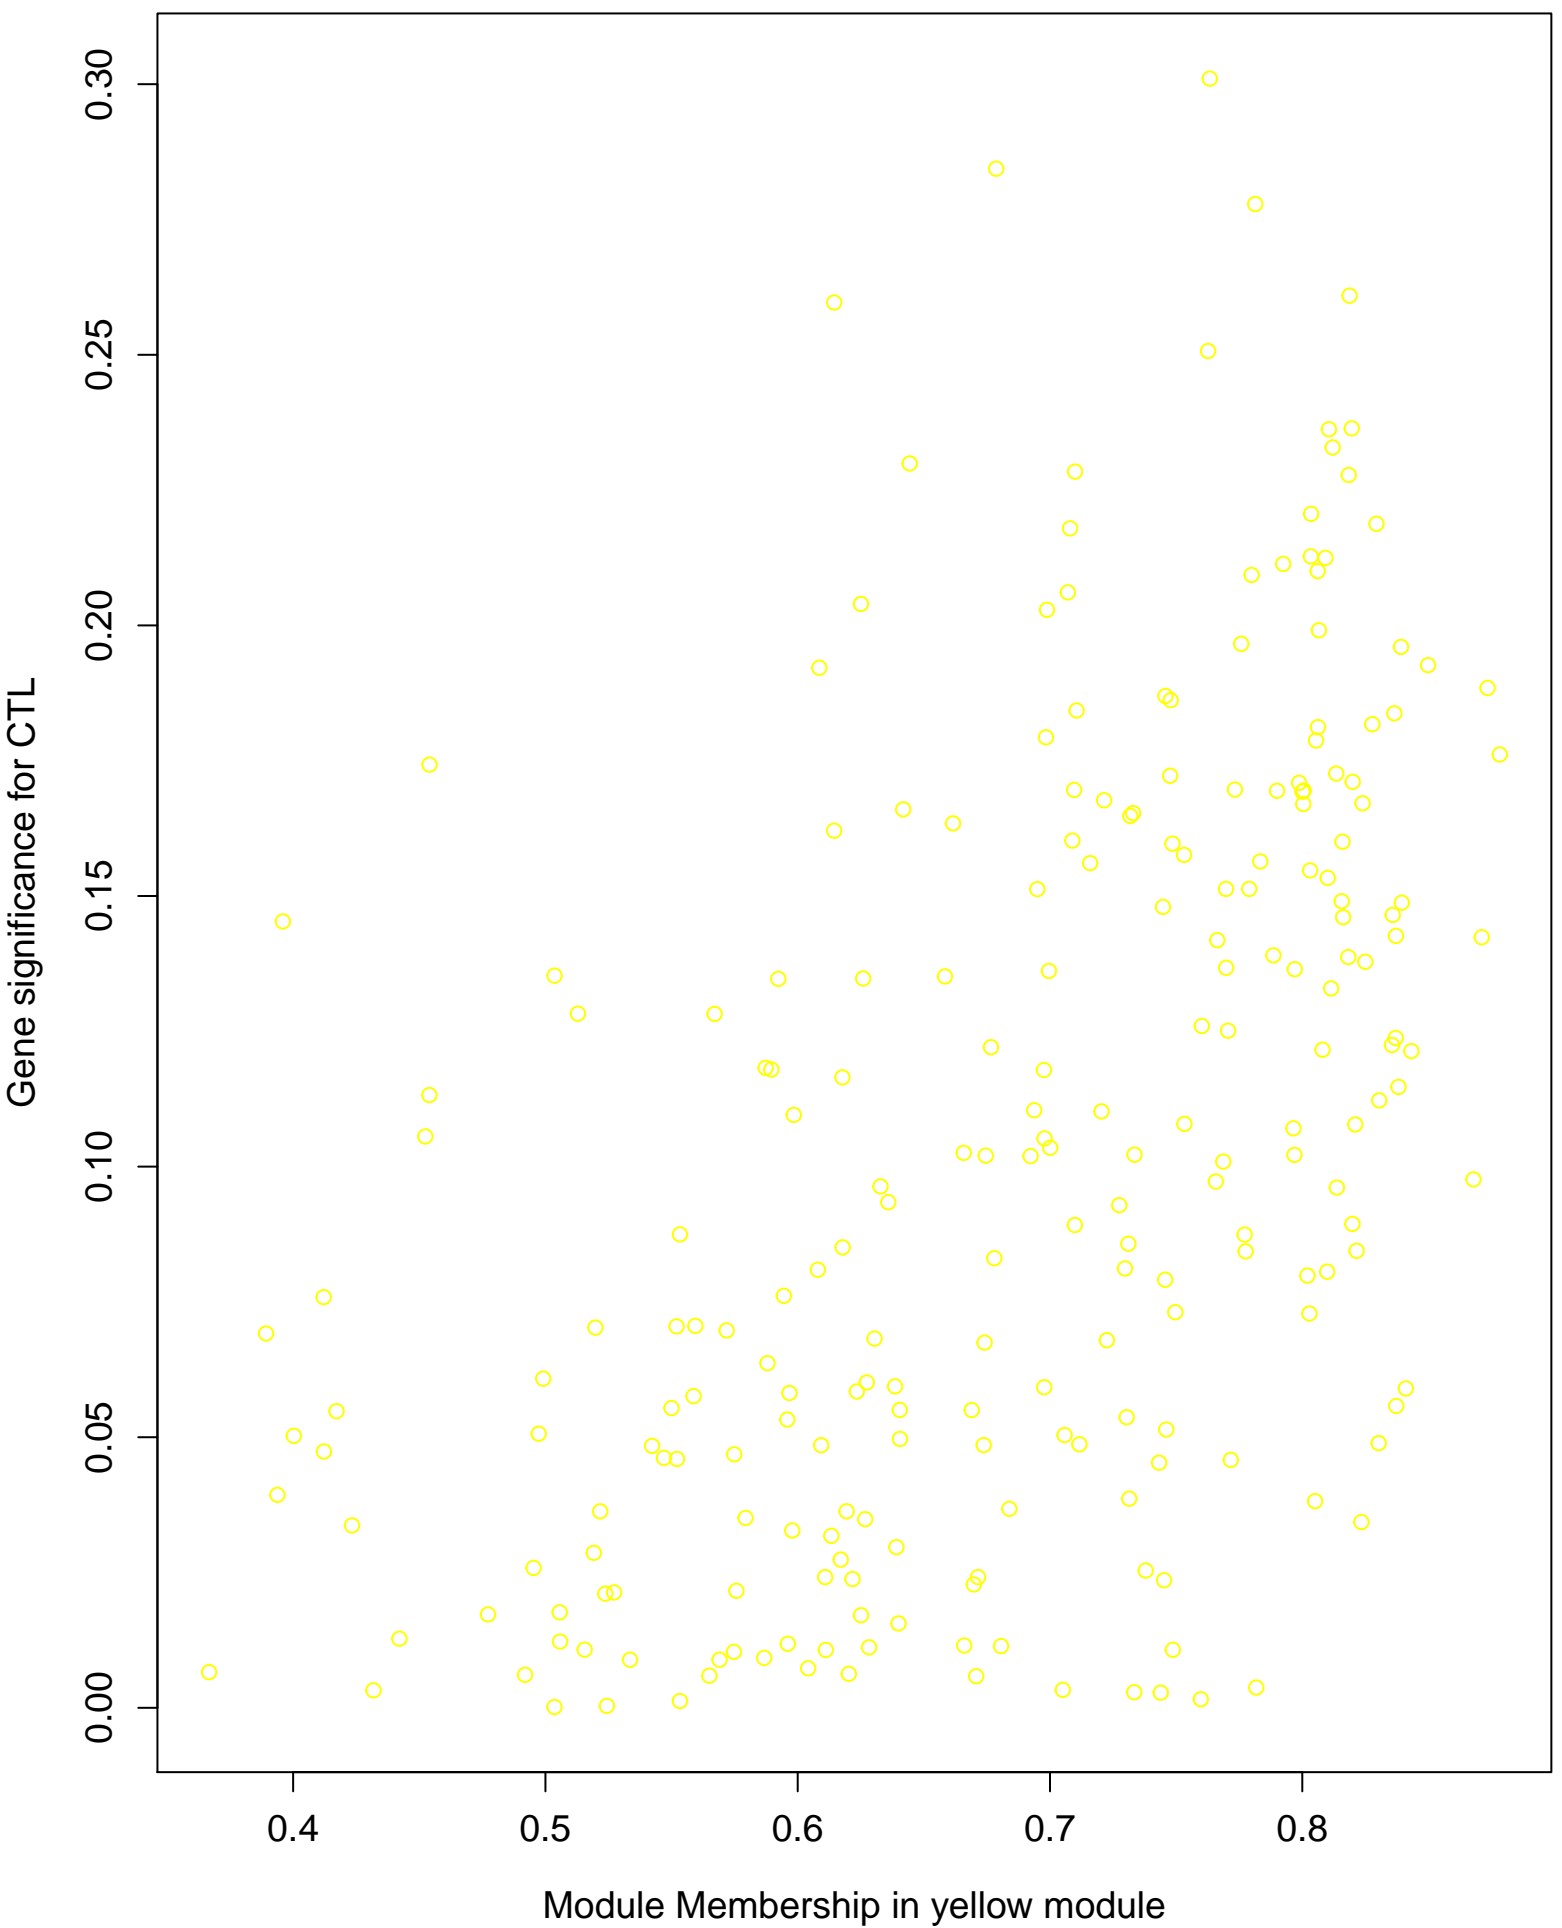

Supplement: Supplementary file 79 [file 15203375]

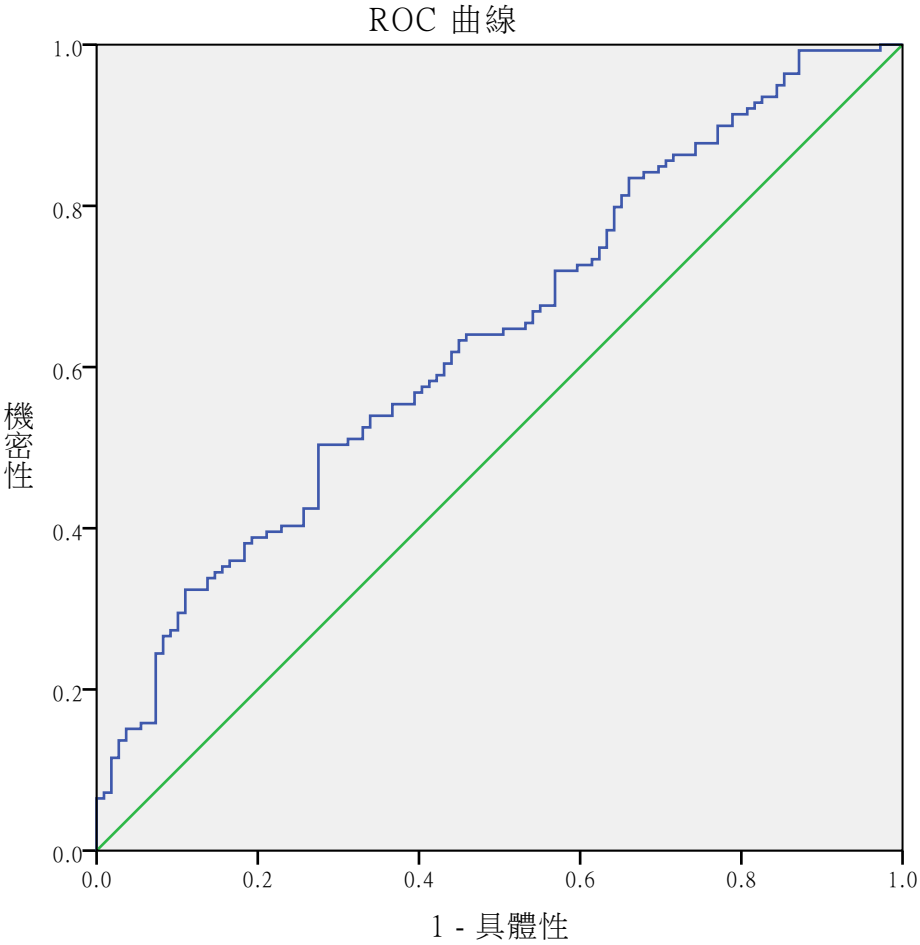

Supplement: Supplementary file 83 [file 15203375]

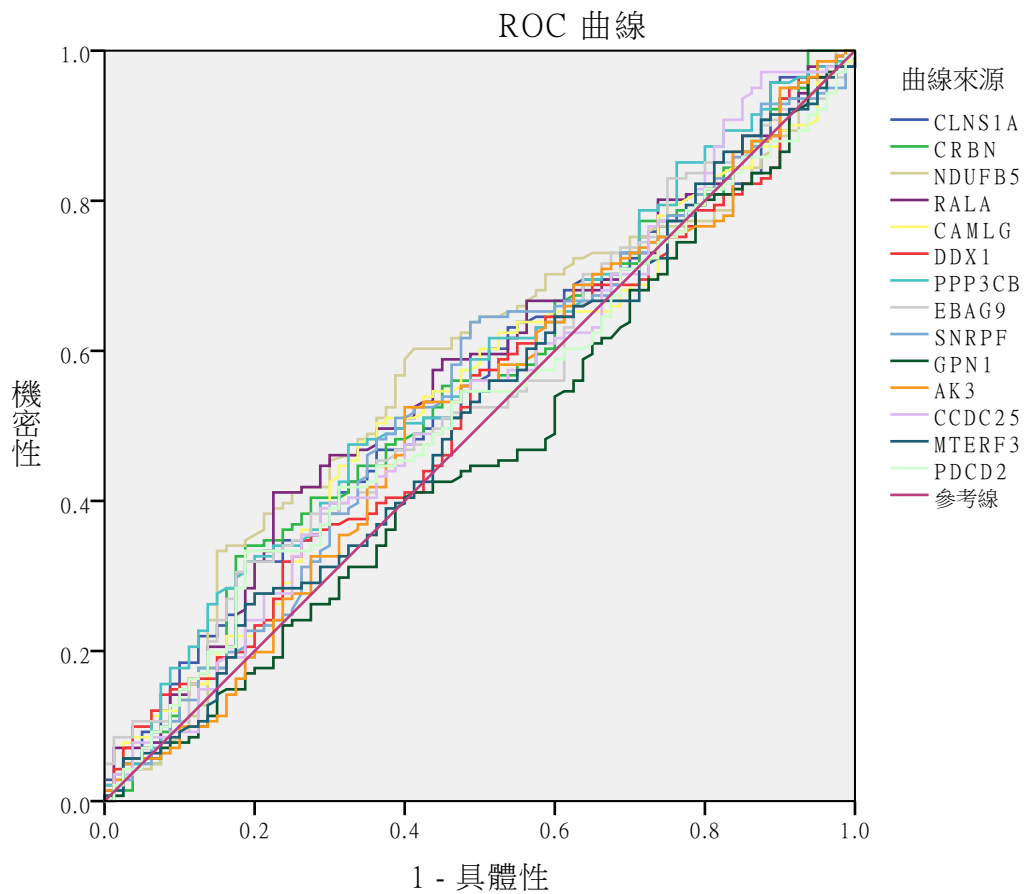

同分產生的對數區段。

Supplement: Supplementary file 84 [file 15203375]

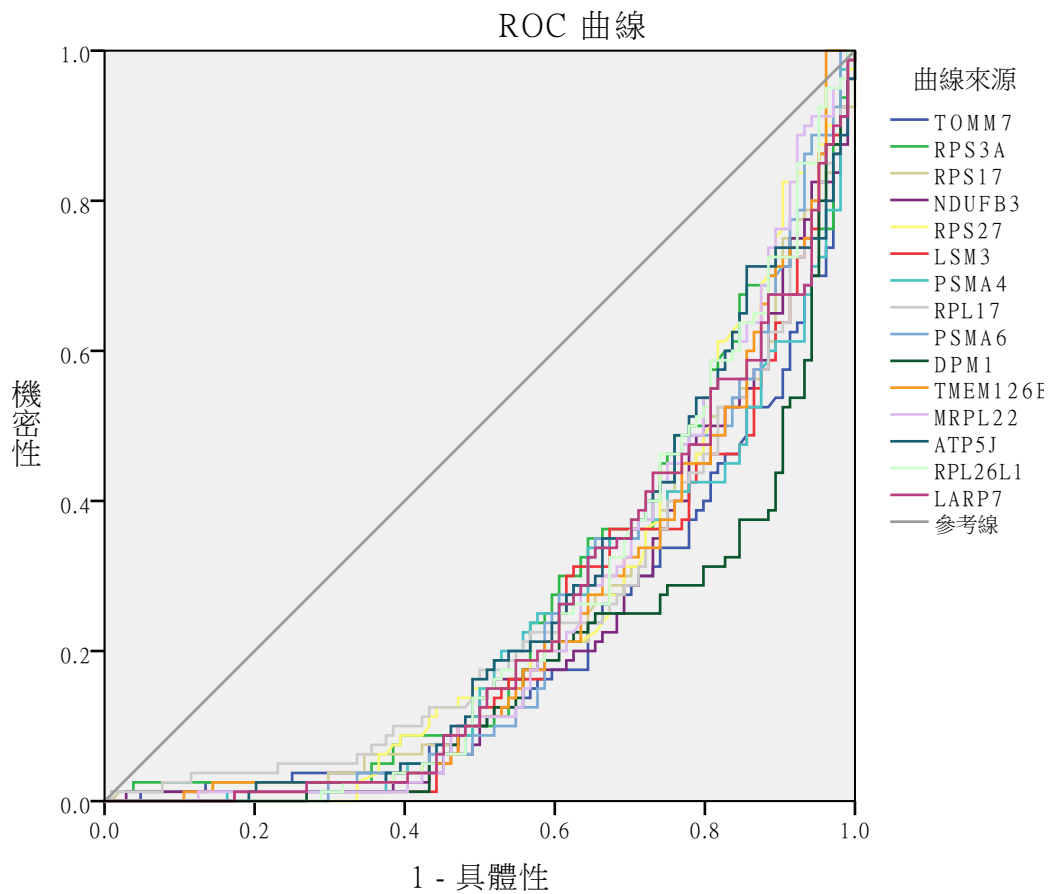

同分產生的對數區段。

Supplement: Supplementary file 86 [file 15203375]

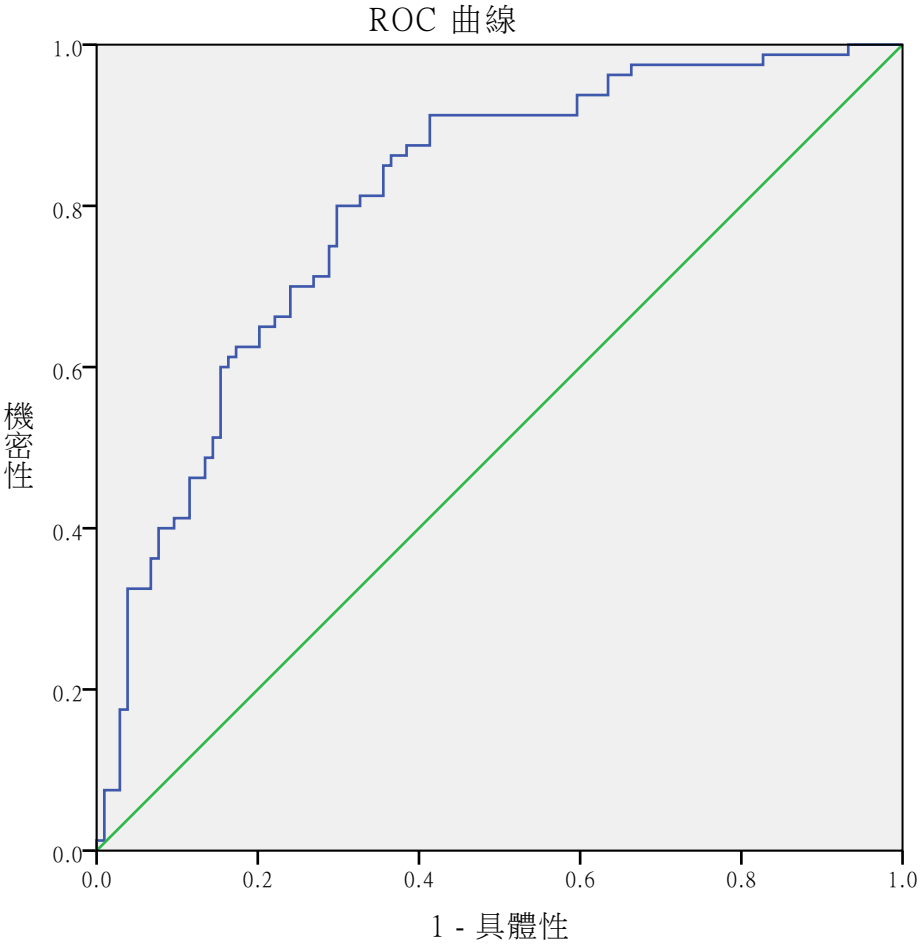

Supplement: Supplementary file 89 [file 15203375]

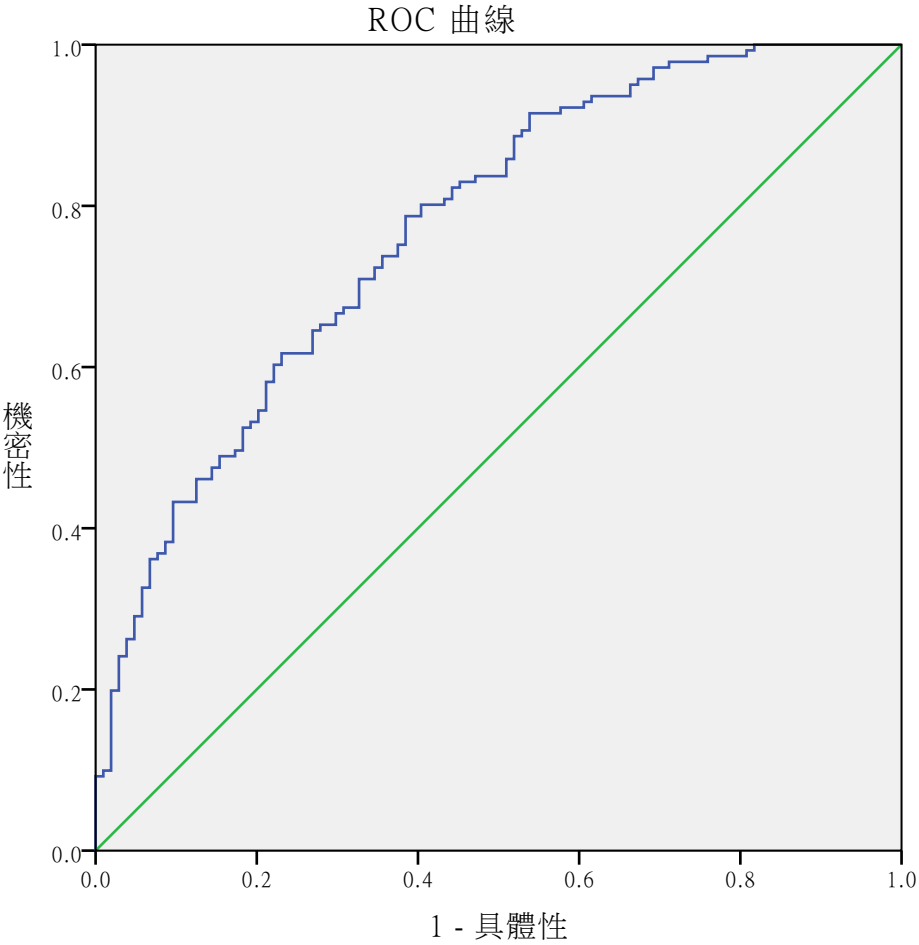

Supplement: Supplementary file 90 [file 15203375]

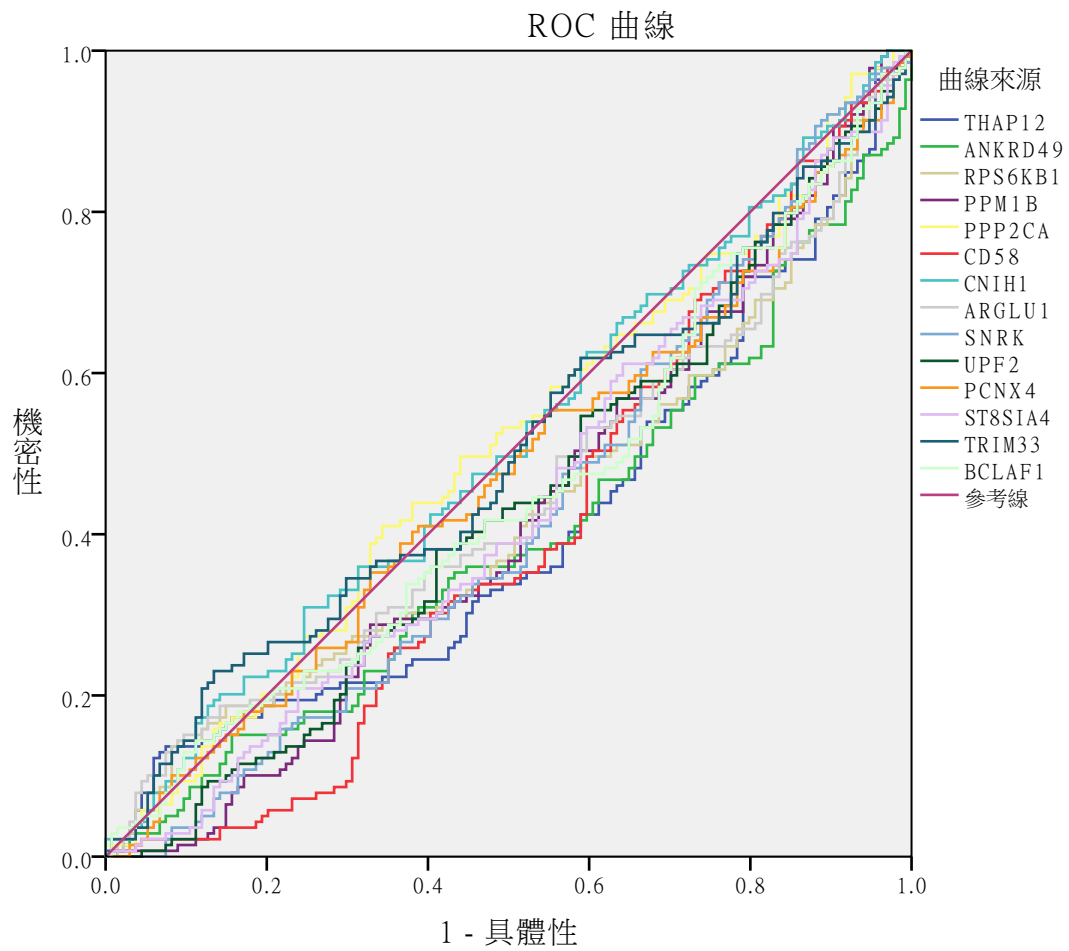

Supplement: Supplementary file 92 [file 15203375]

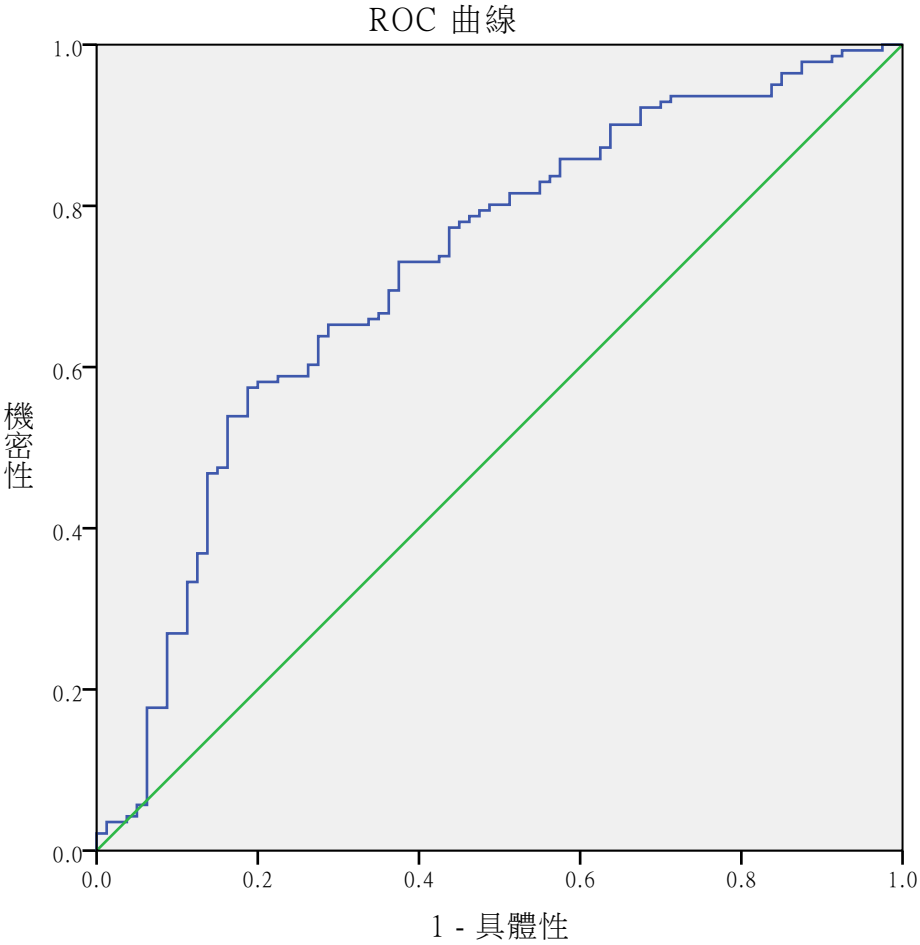

Supplement: Supplementary file 94 [file 15203375]

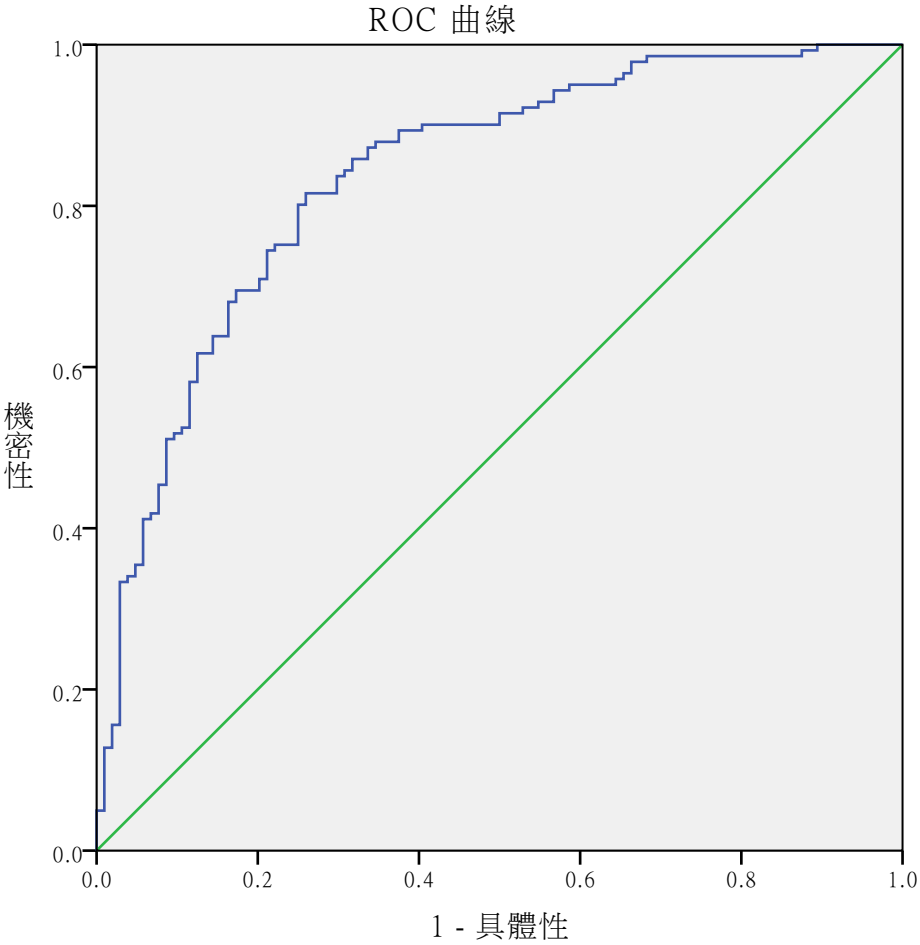

Supplement: Supplementary file 96 [file 15203375]

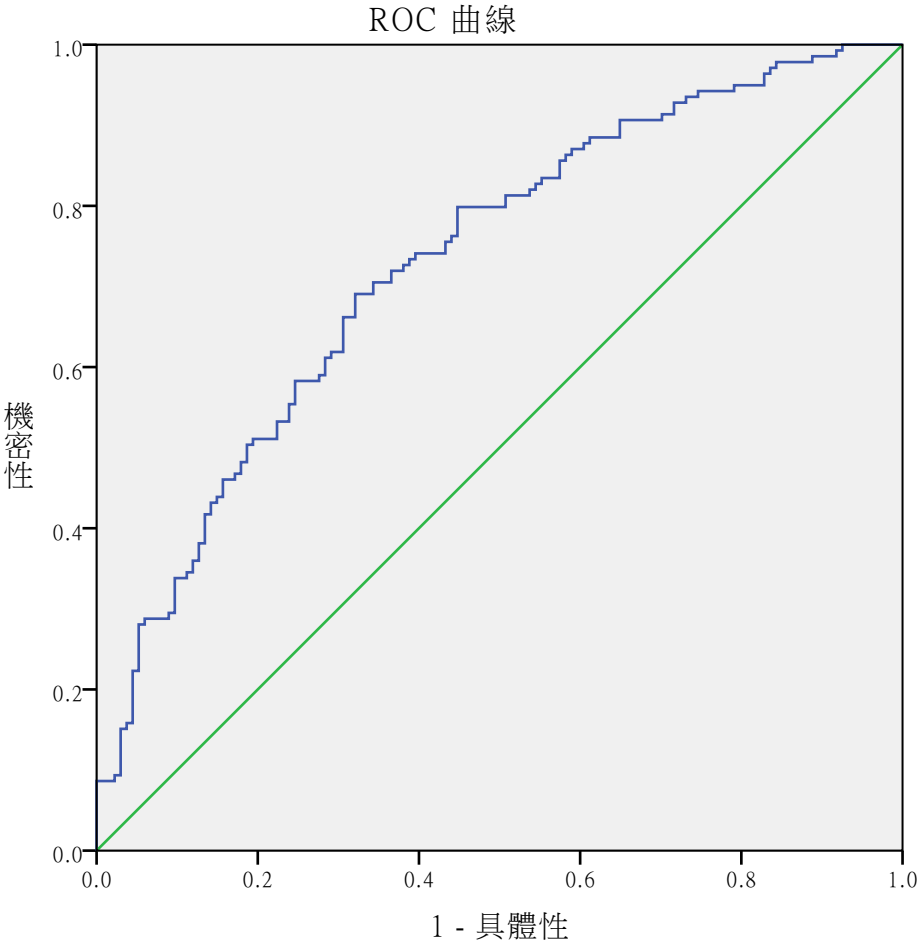

Supplement: Supplementary file 97 [file 15203375]

**Module membership vs. gene significance**  
**cor=0.5, p=1.5e-63**

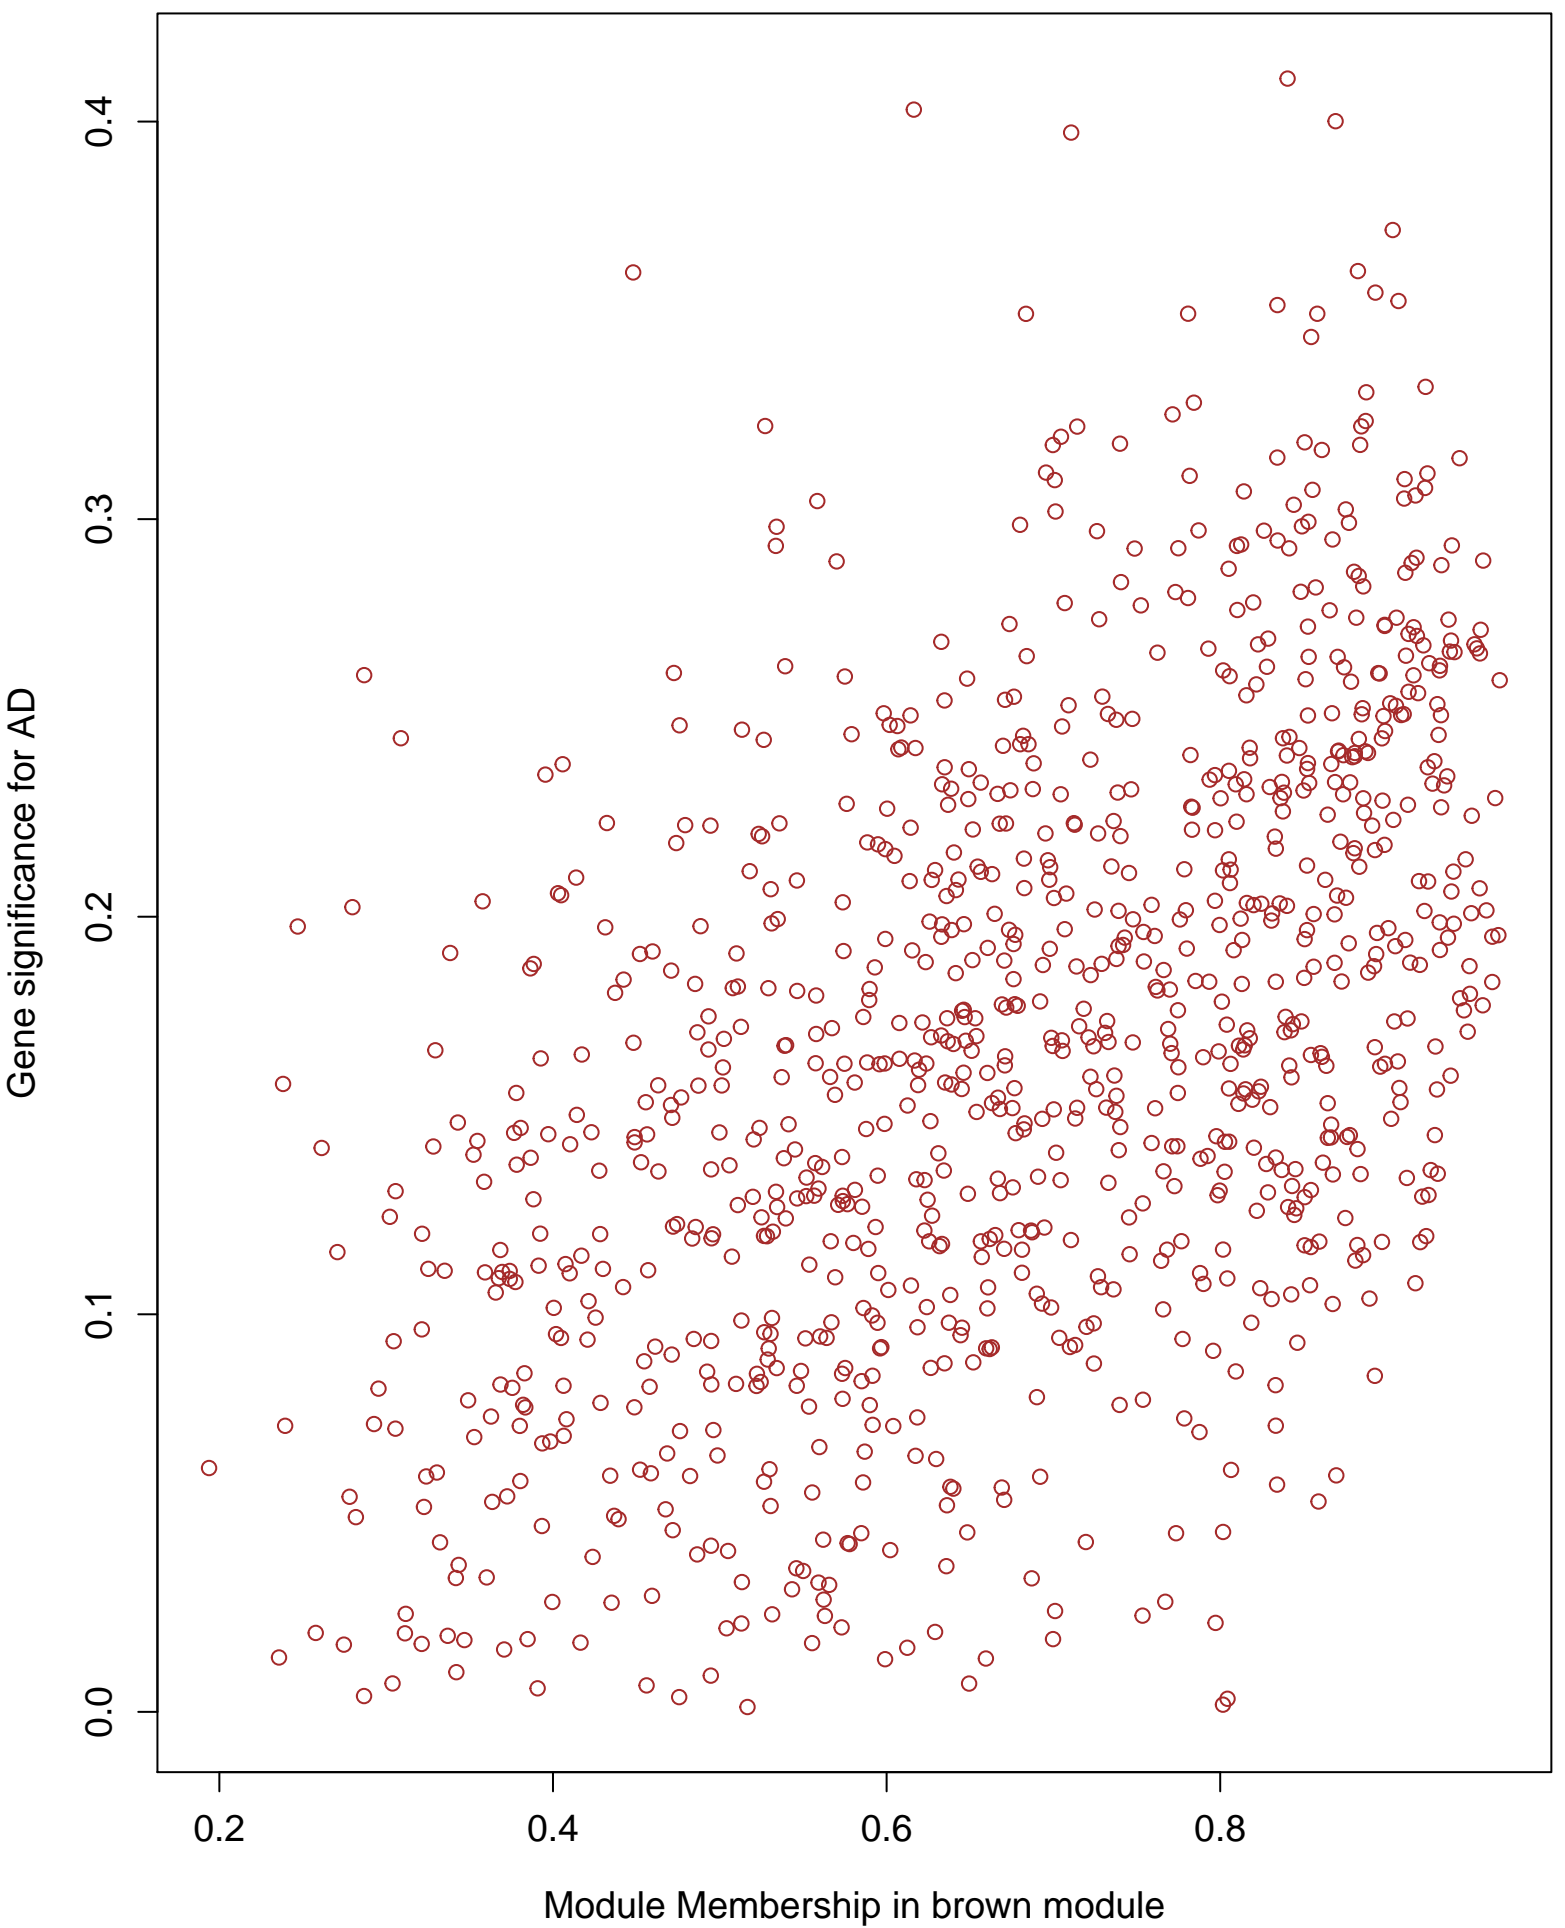

Supplement: Supplementary file 98 [file 15203375]

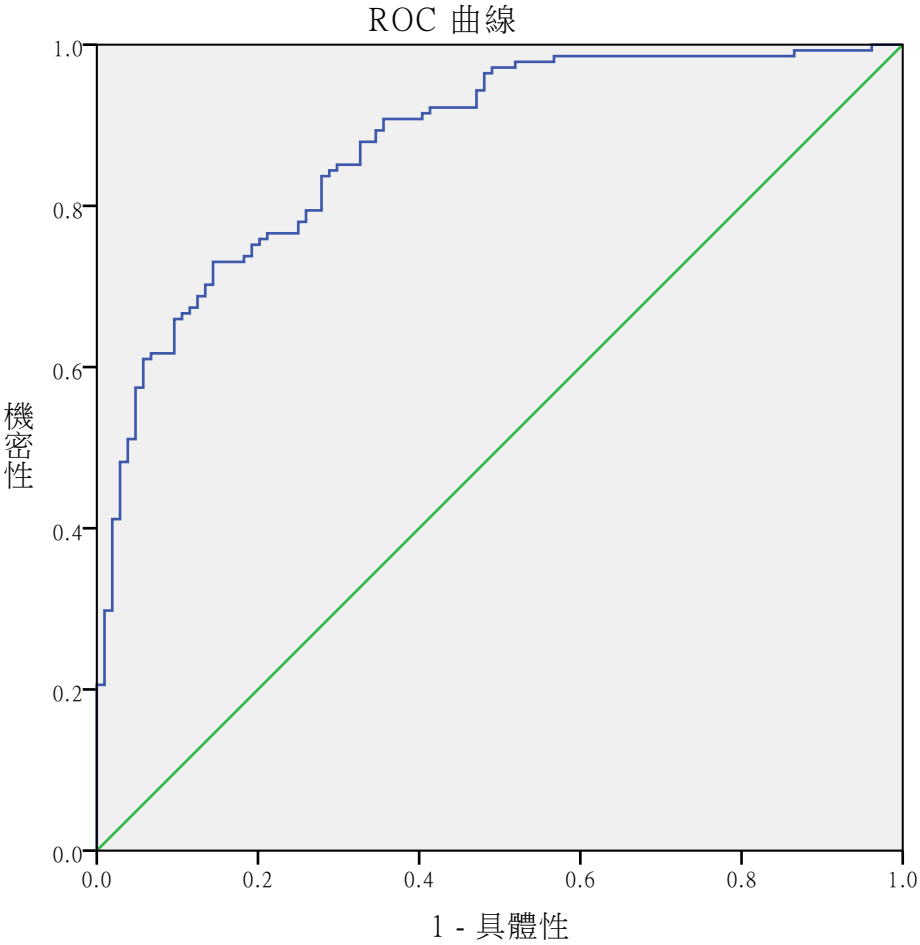

Supplement: Supplementary file 100 [file 15203375]

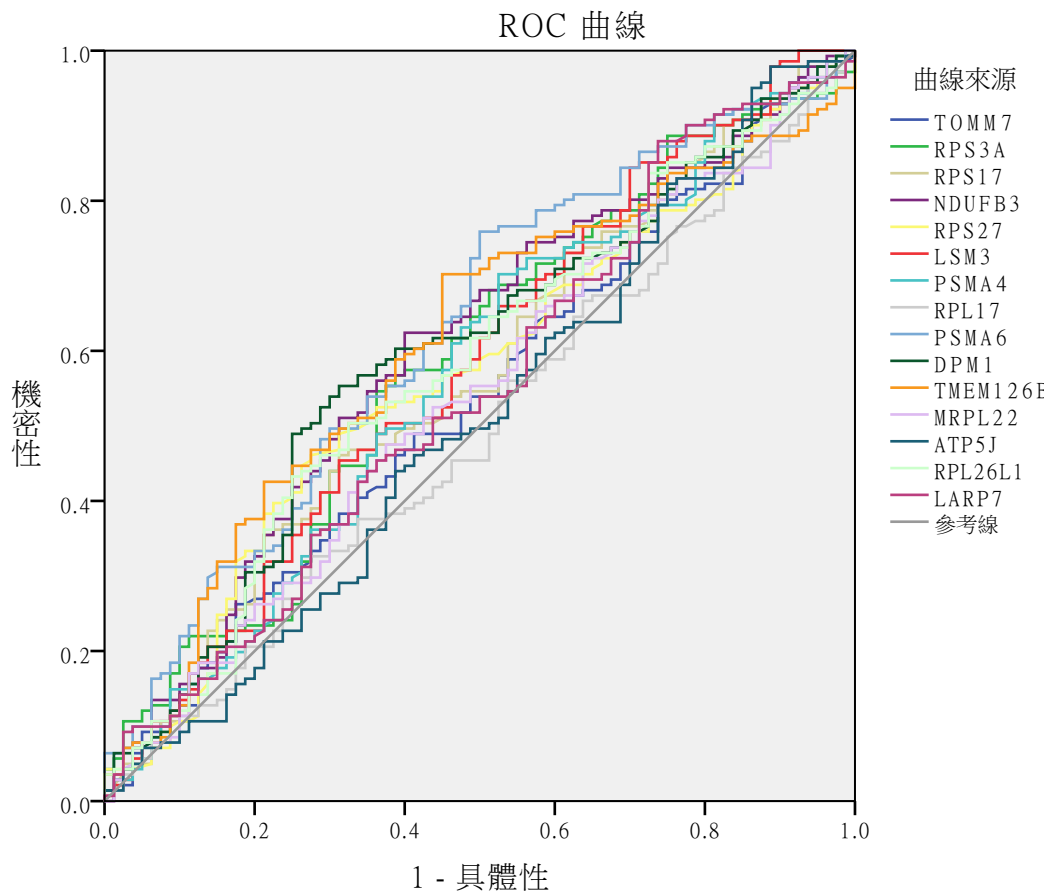

同分產生的對數區段。

Supplement: Supplementary file 102 [file 15203375]

**Module membership vs. gene significance**  
**cor=0.58, p=1e-79**

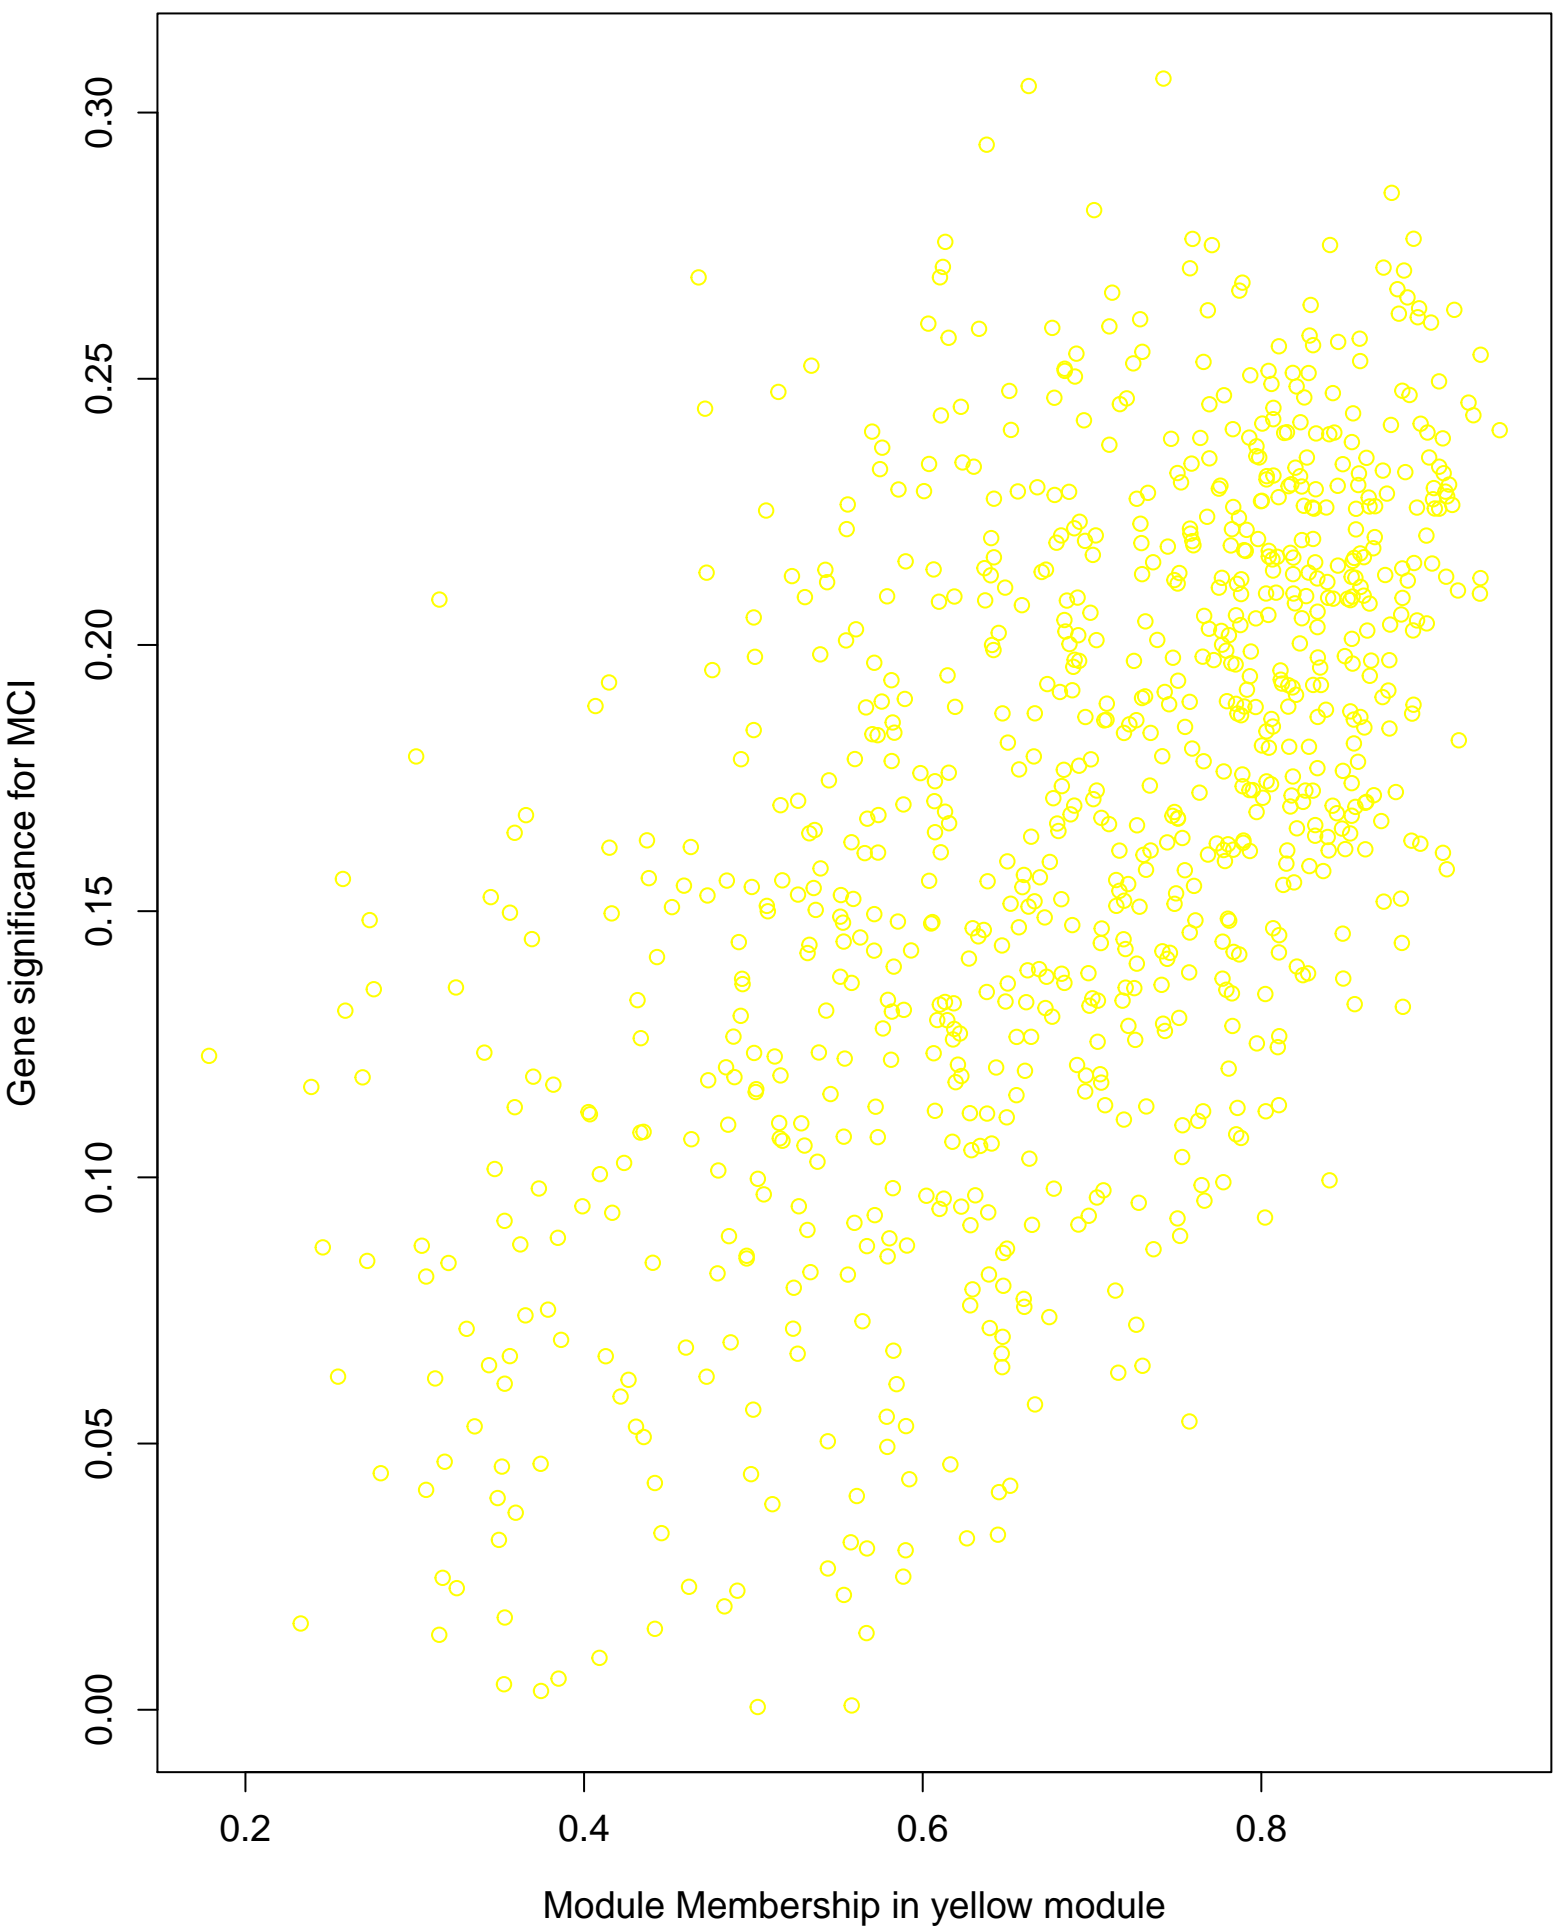

Supplement: Supplementary file 104 [file 15203375]

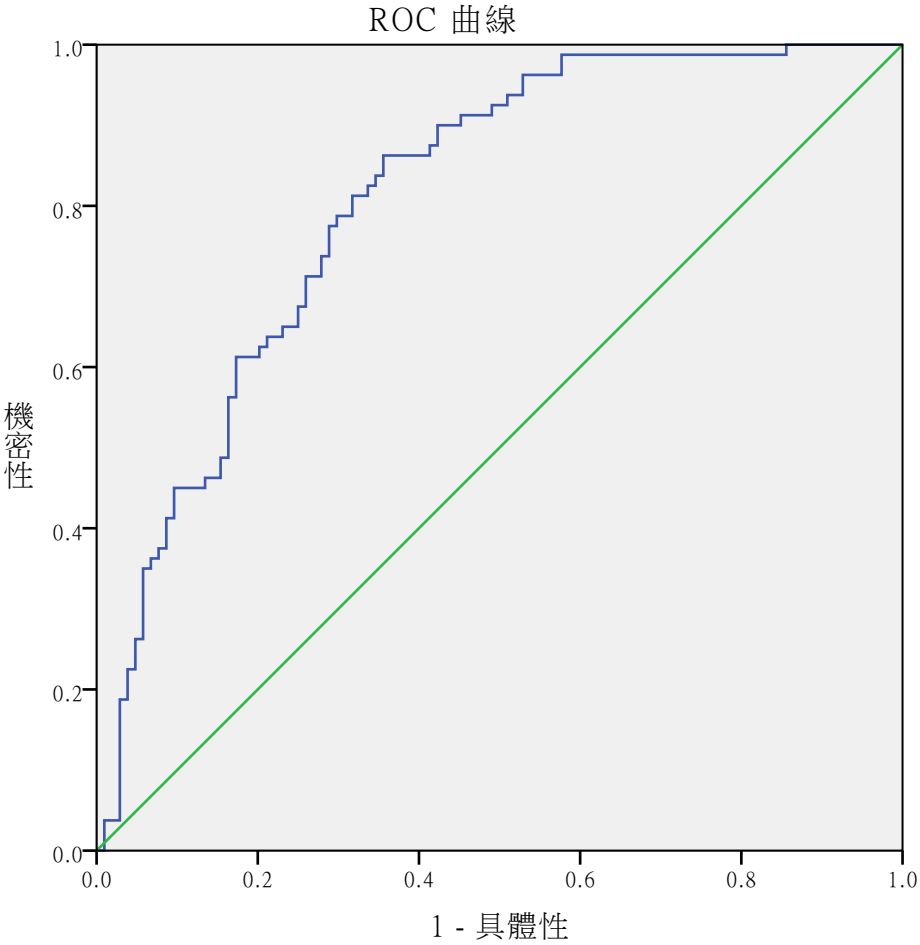

Supplement: Supplementary file 106 [file 15203375]

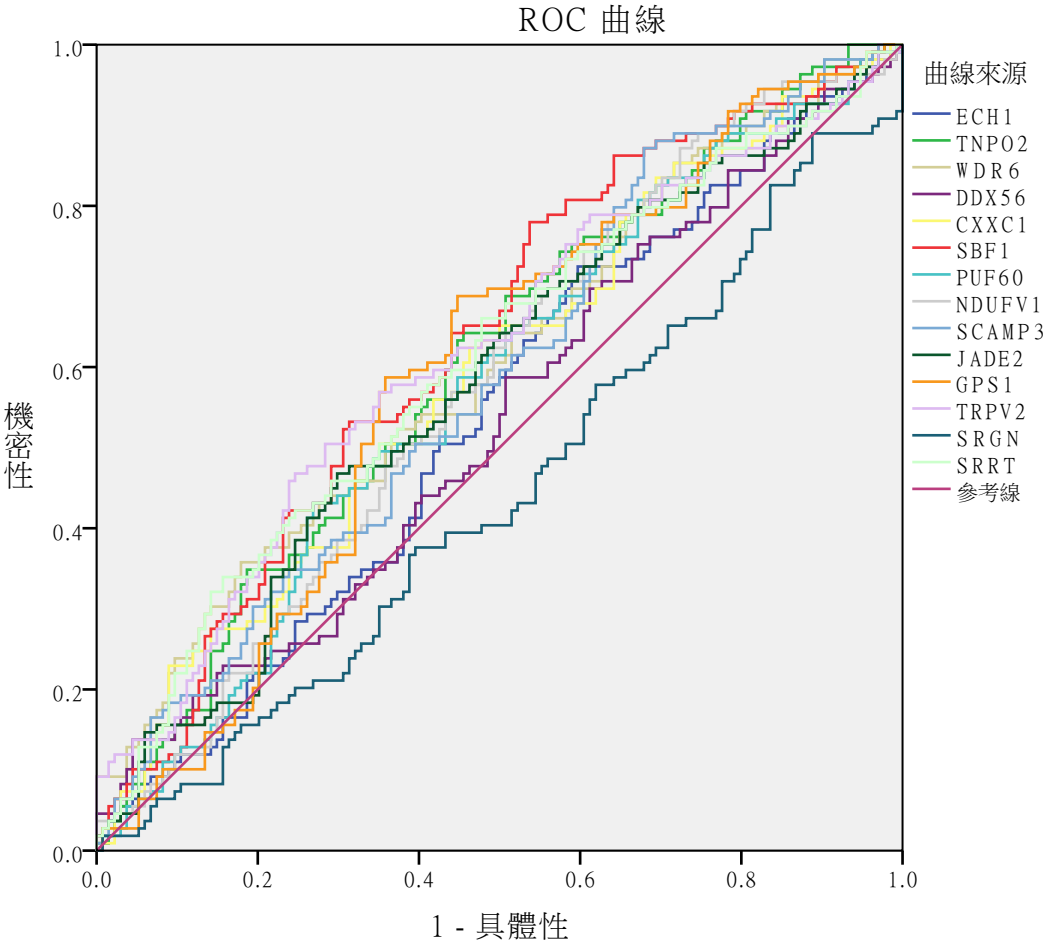

Supplement: Supplementary file 107 [file 15203375]

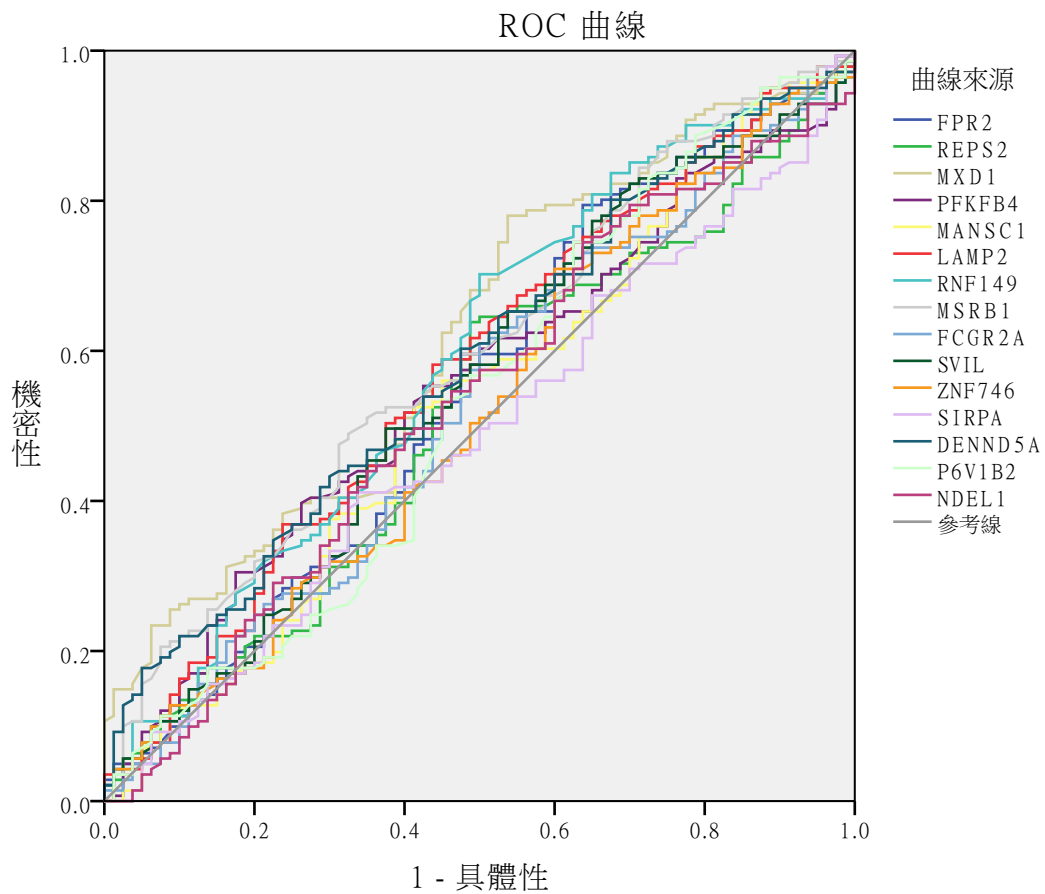

同分產生的對數區段。

Supplement: Supplementary file 110 [file 15203375]

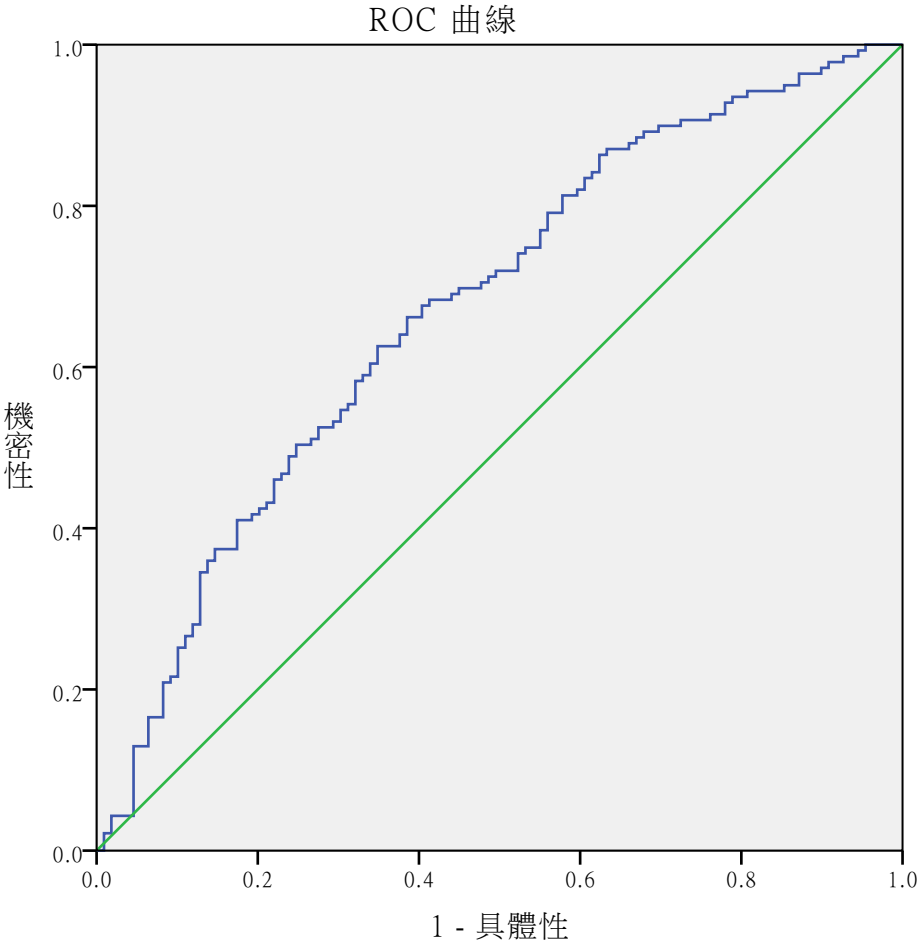

Supplement: Supplementary file 111 [file 15203375]

**Module membership vs. gene significance**  
**cor=0.21, p=2.1e-05**

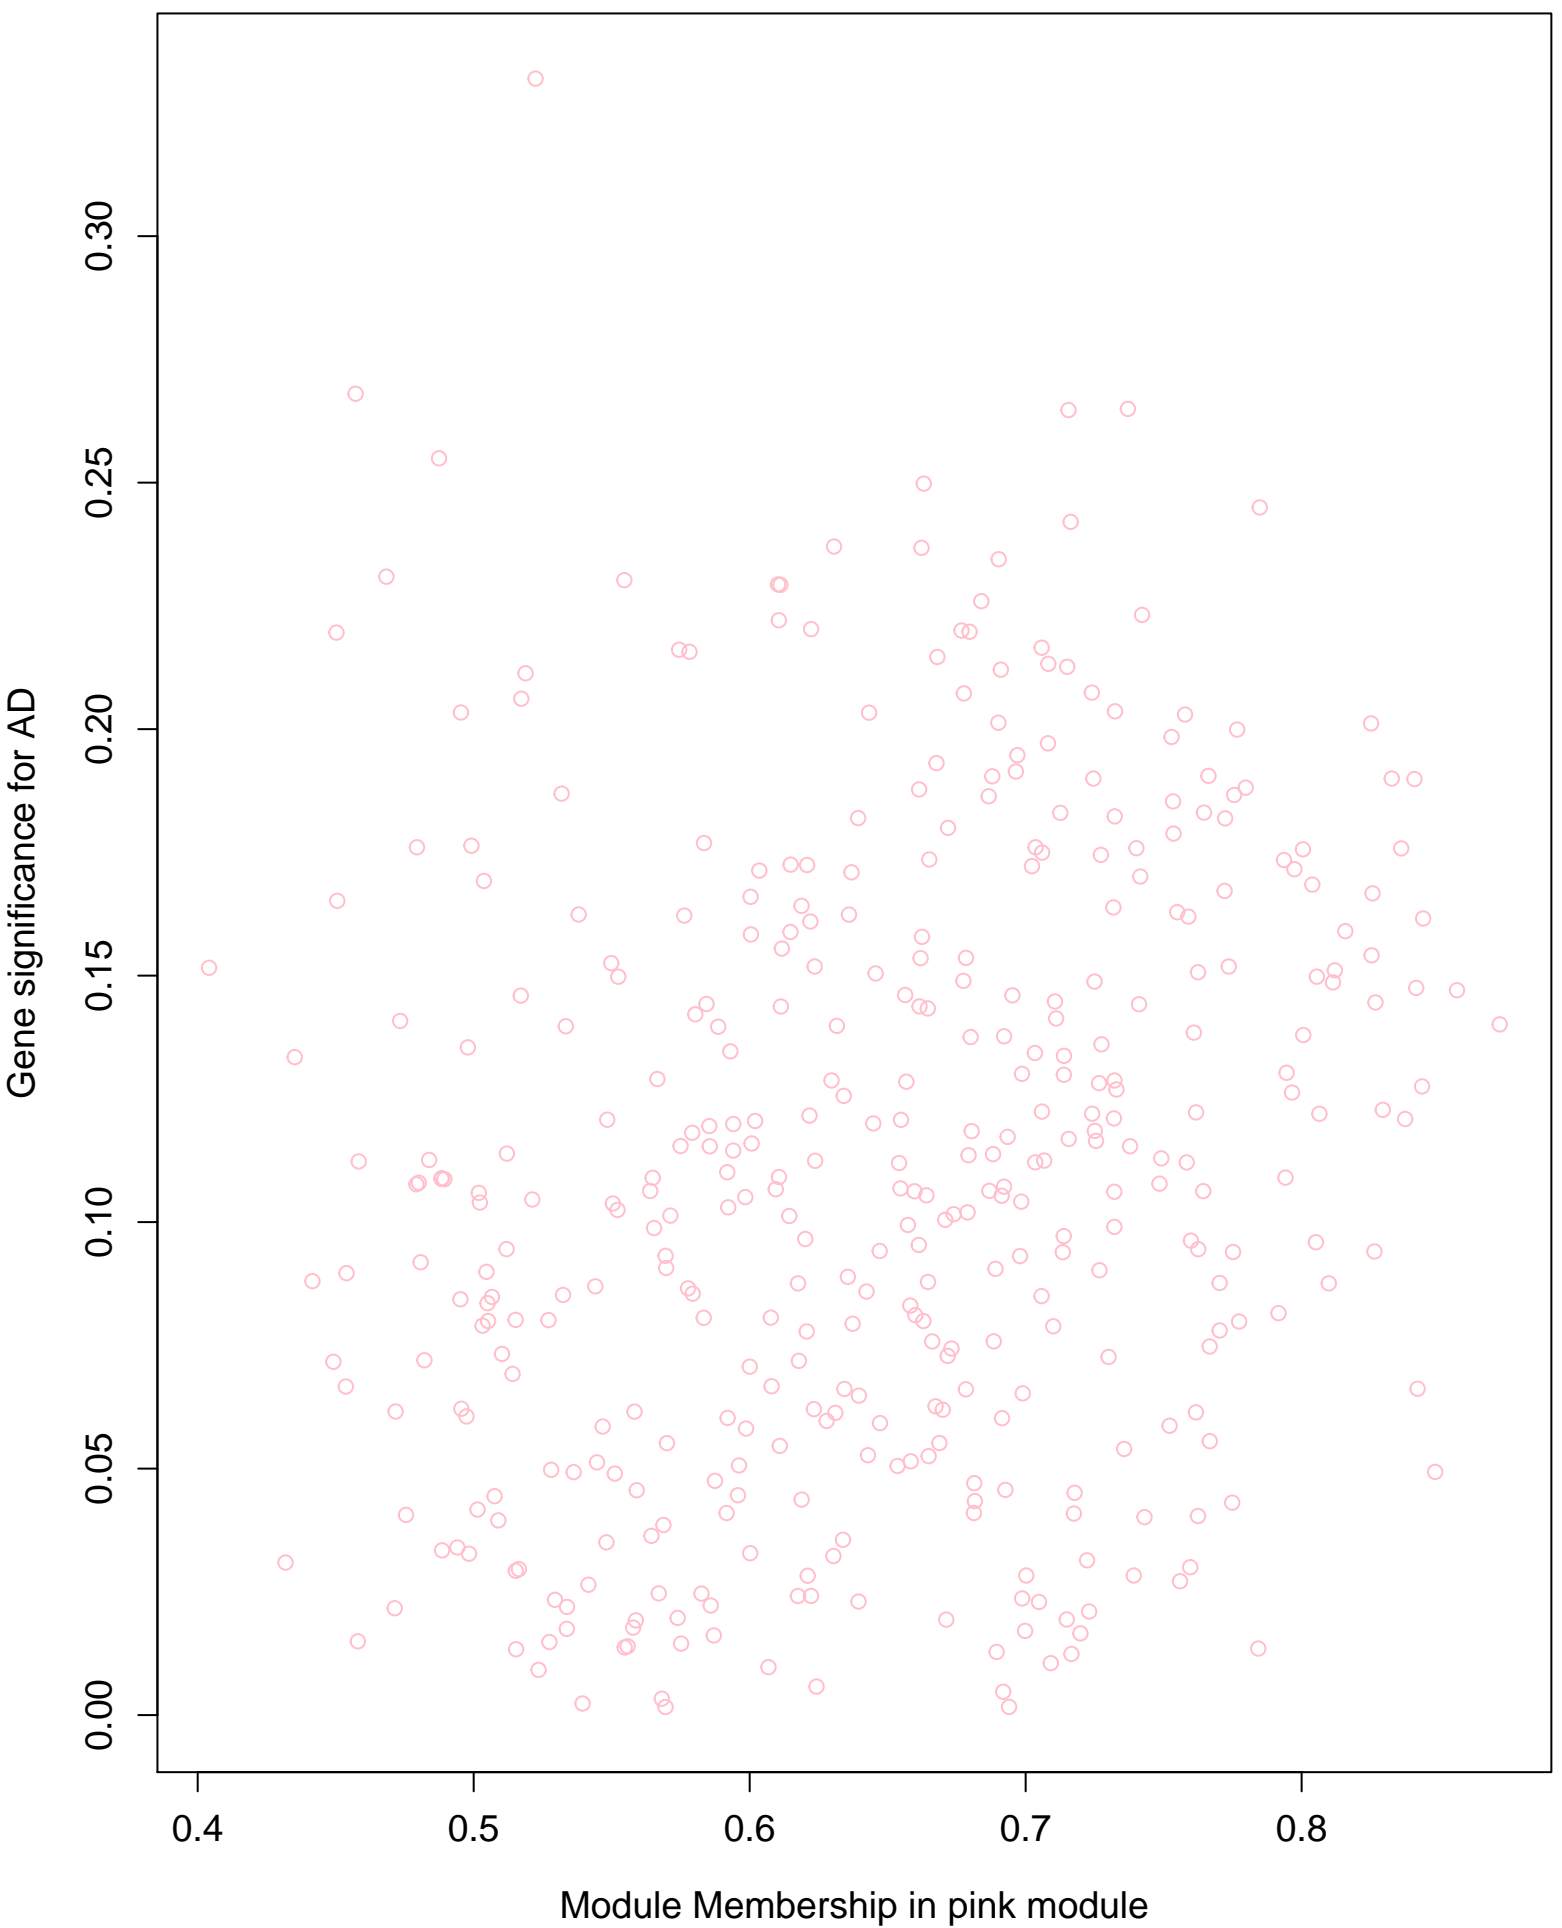

Supplement: Supplementary file 113 [file 15203375]

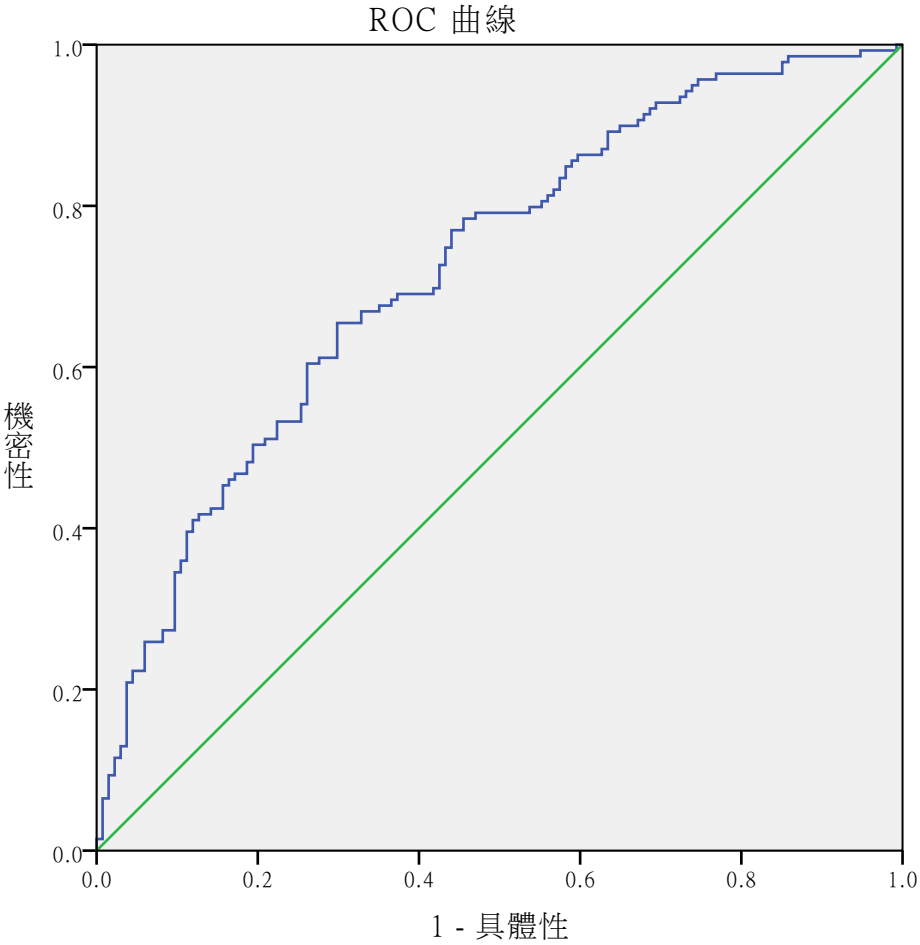

Supplement: Supplementary file 114 [file 15203375]

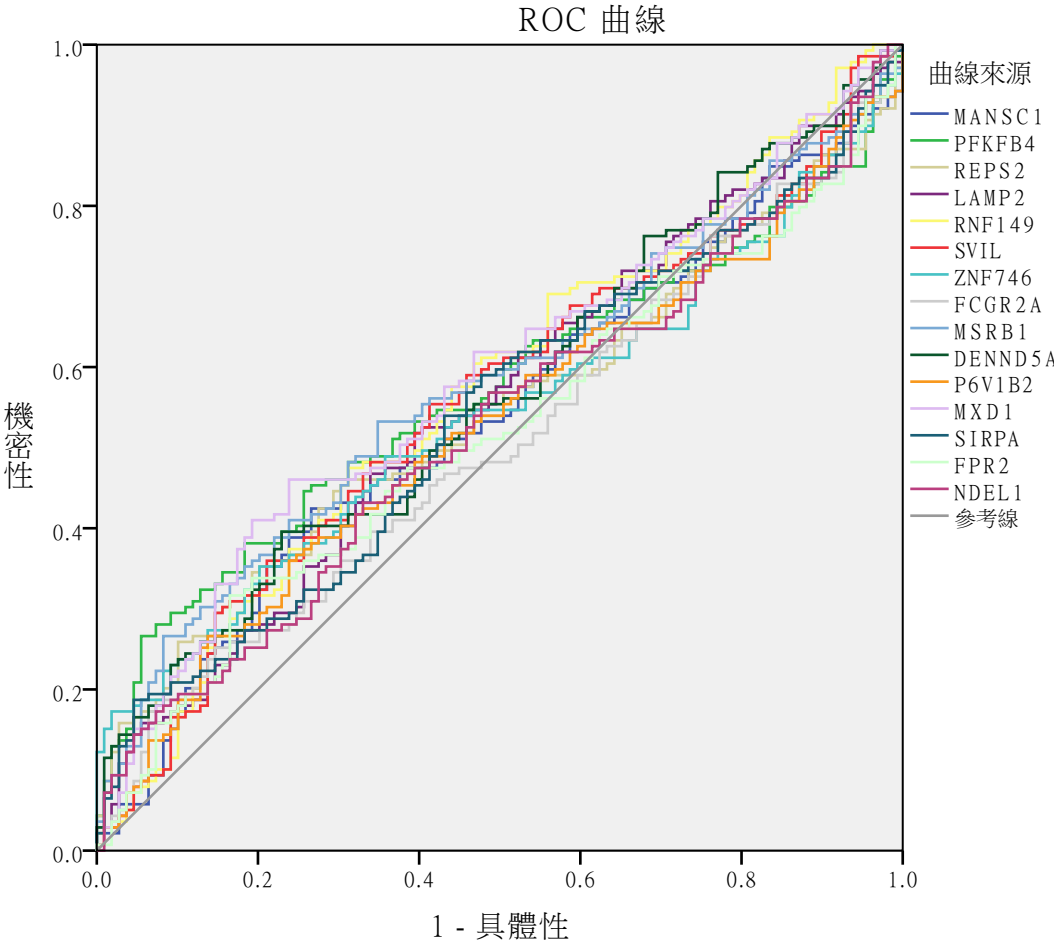

Supplement: Supplementary file 115 [file 15203375]

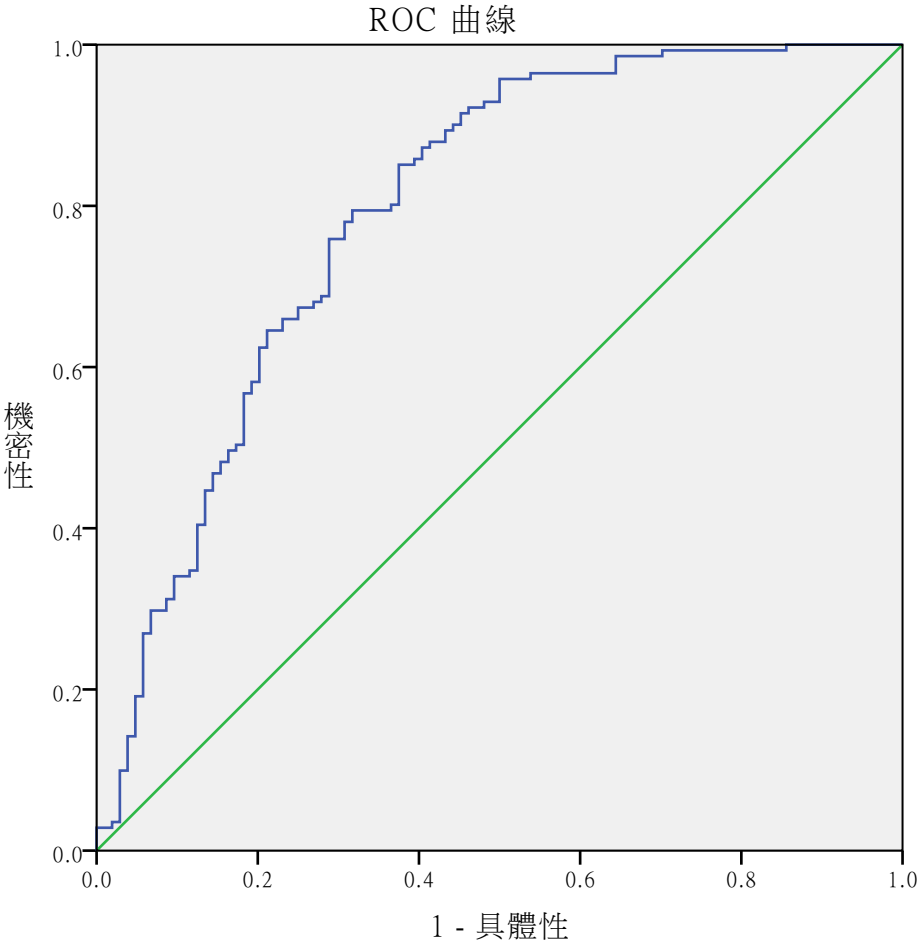

Supplement: Supplementary file 116 [file 15203375]

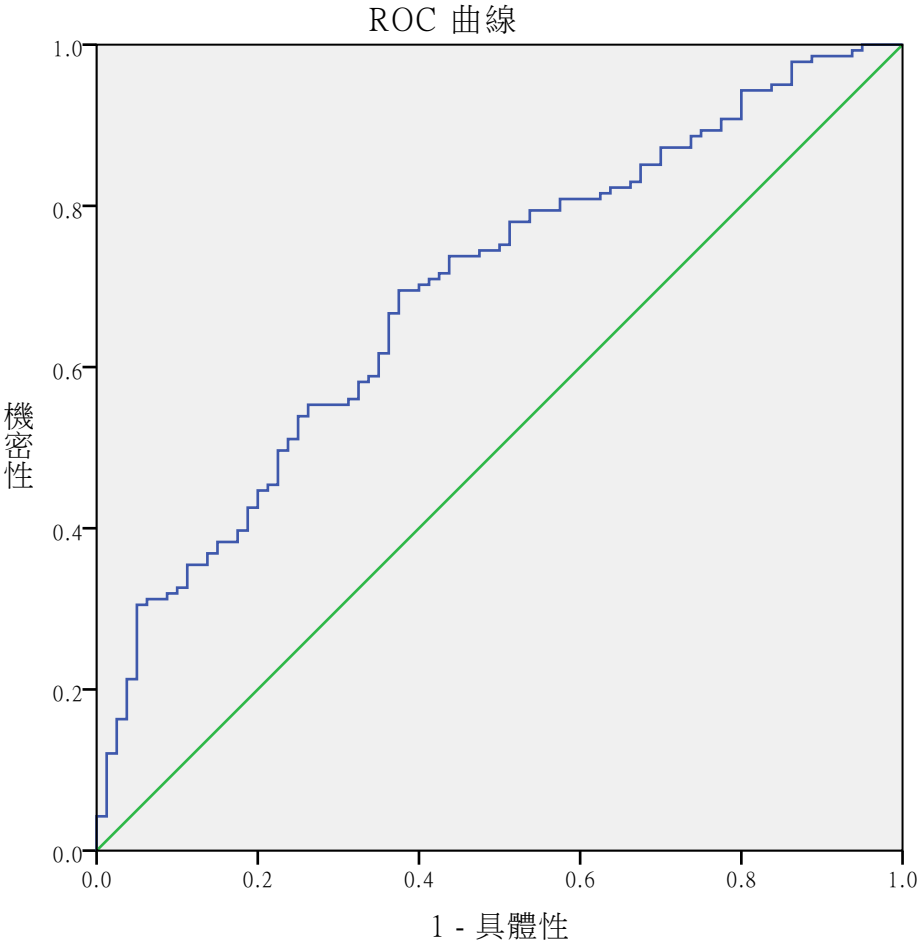

Supplement: Supplementary file 118 [file 15203375]

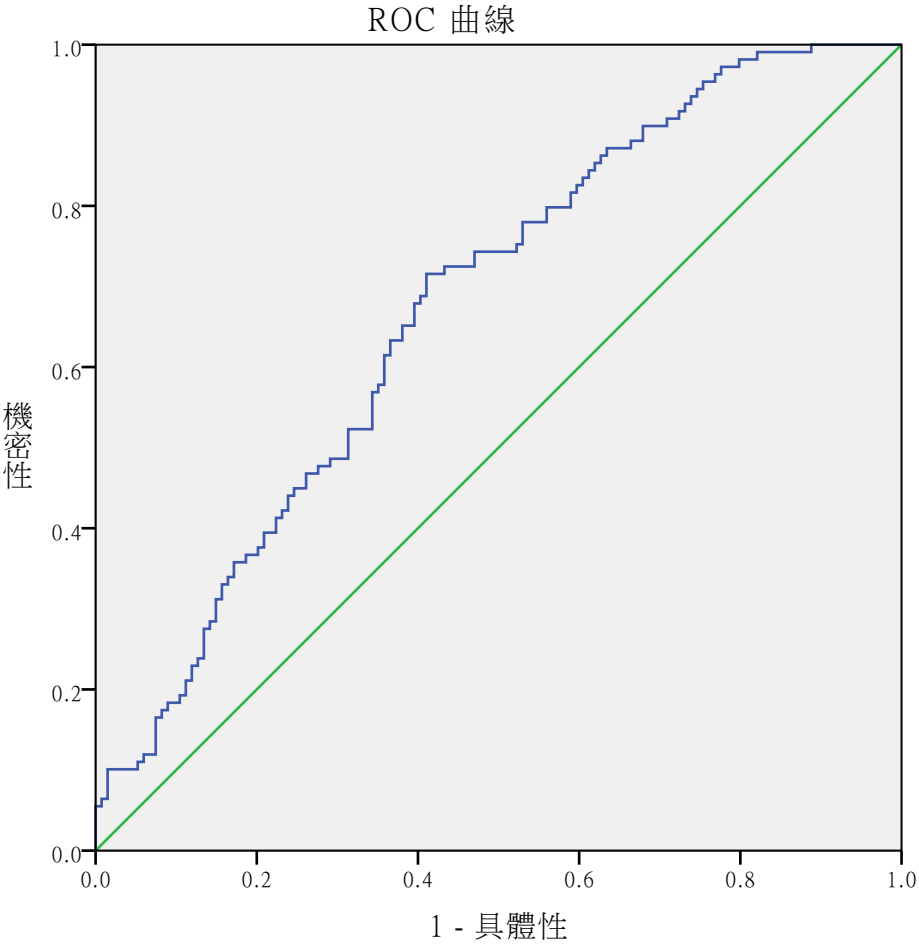

Supplement: Supplementary file 124 [file 15203375]

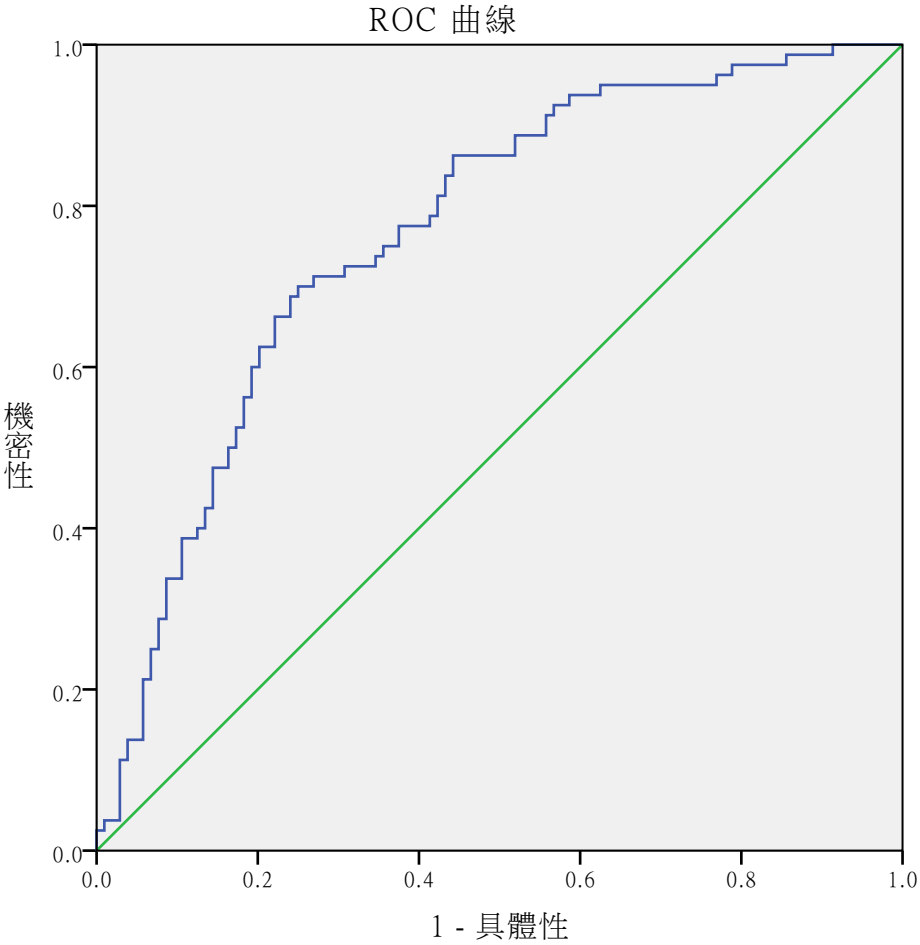

Supplement: Supplementary file 125 [file 15203375]

**Module membership vs. gene significance**  
**cor=0.26, p=0.00015**

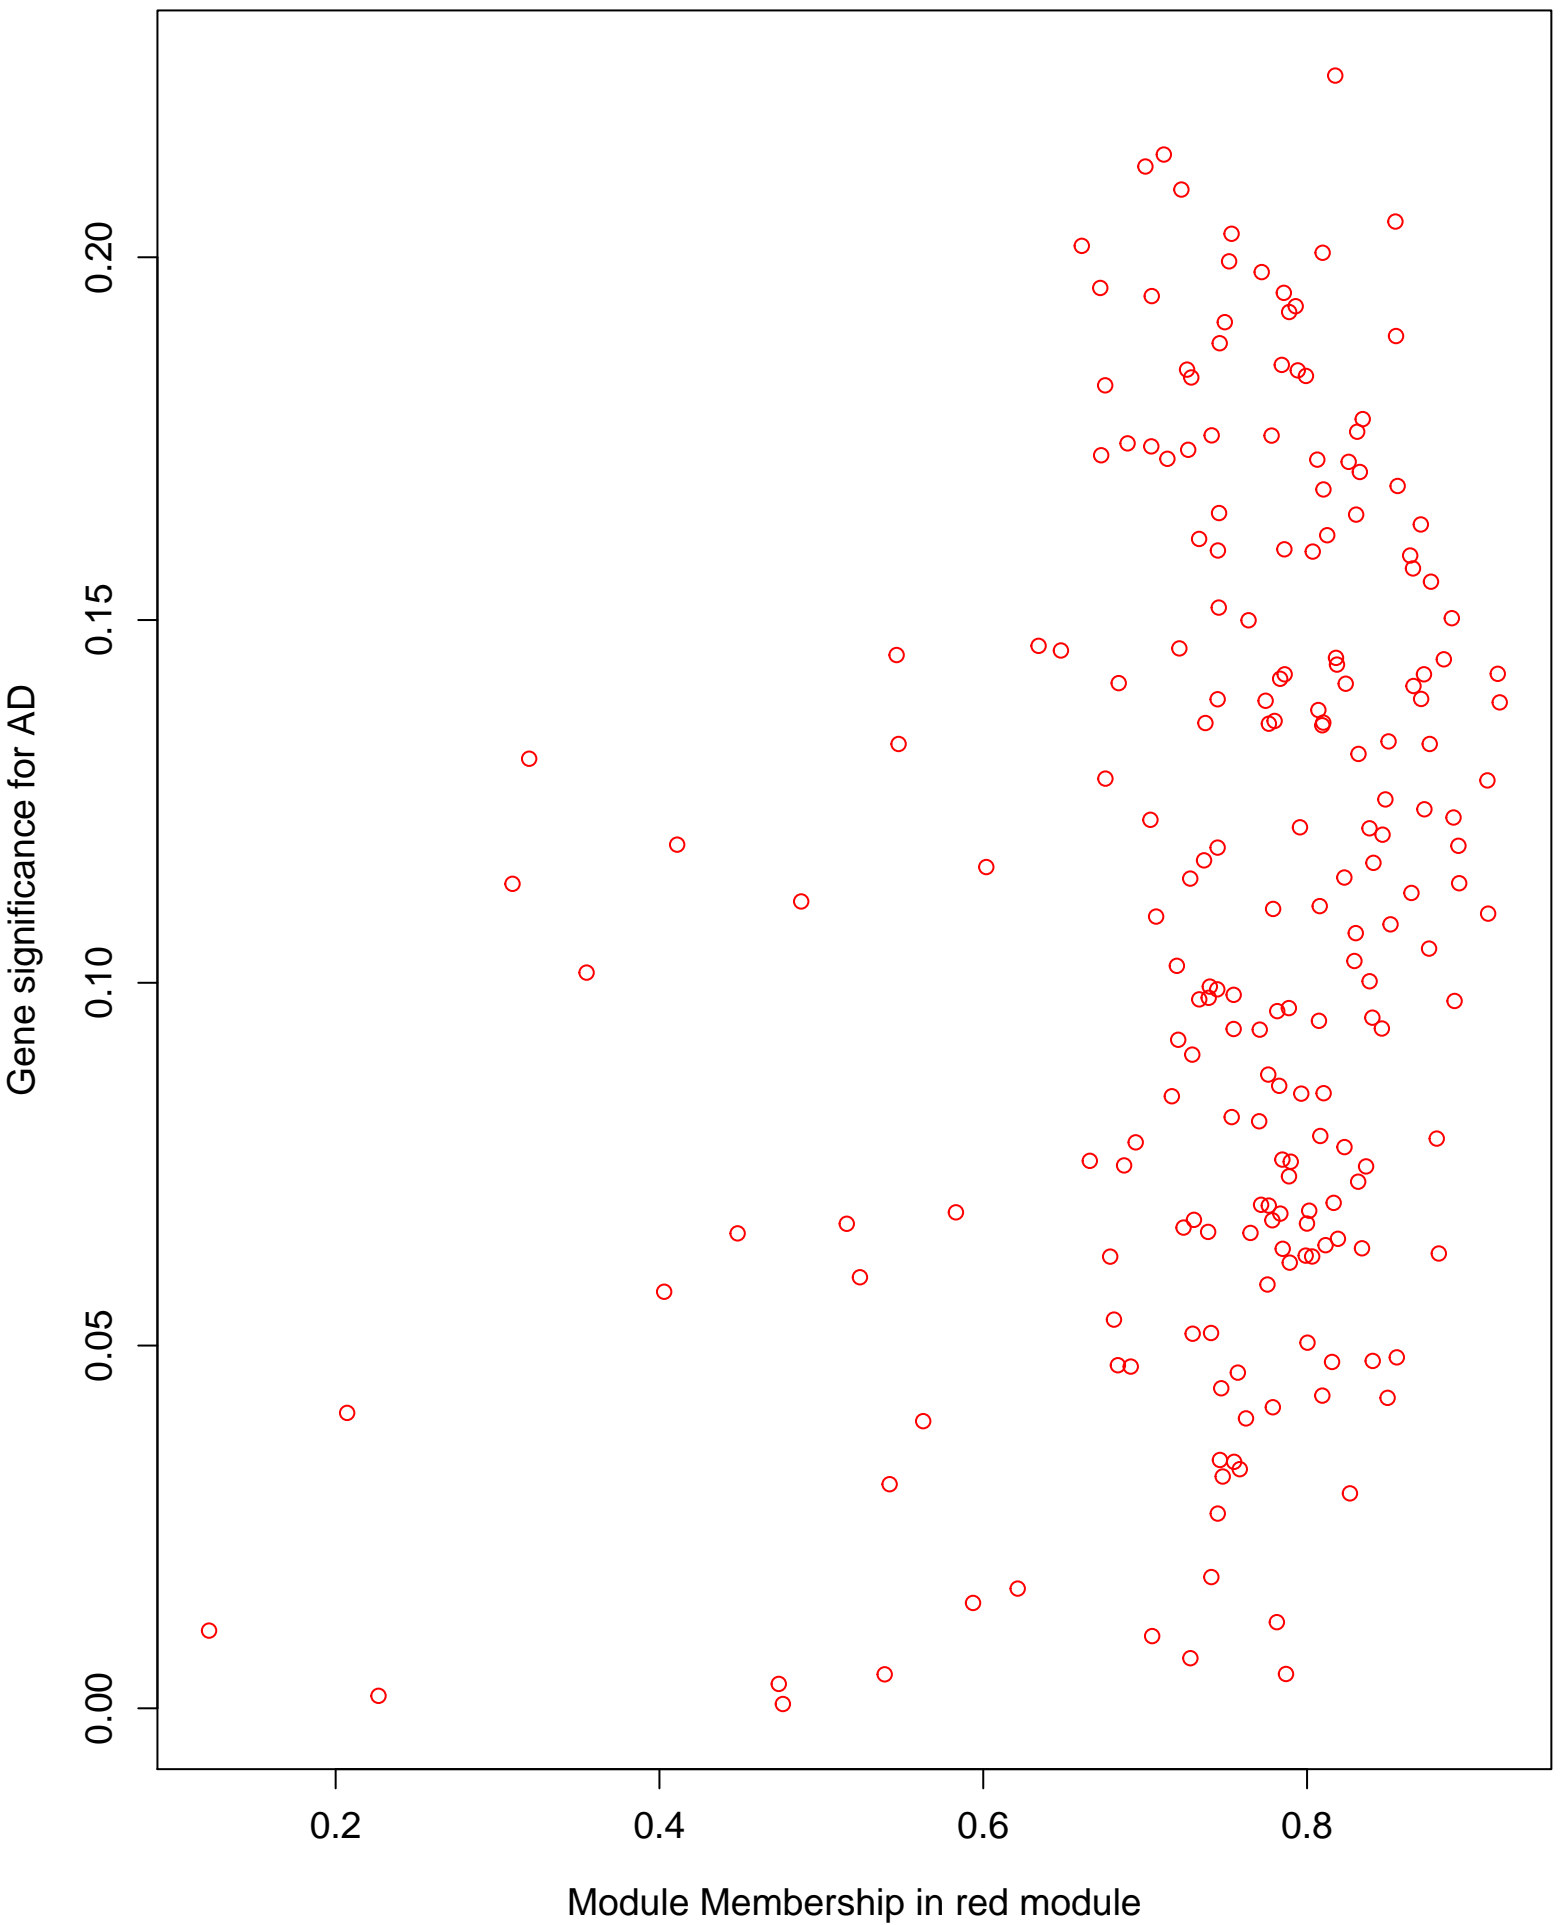

Supplement: Supplementary file 127 [file 15203375]

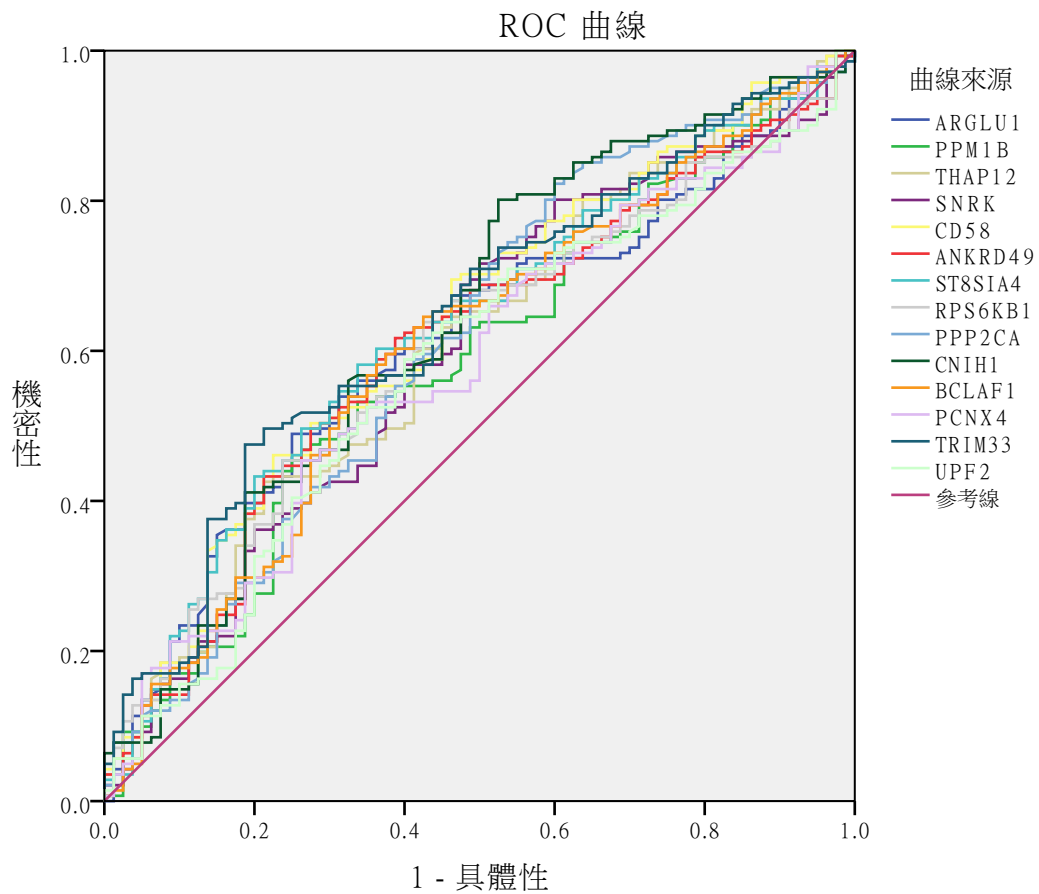

同分產生的對數區段。

Supplement: Supplementary file 130 [file 15203375]

**Module membership vs. gene significance**  
**cor=0.11, p=3.2e-06**

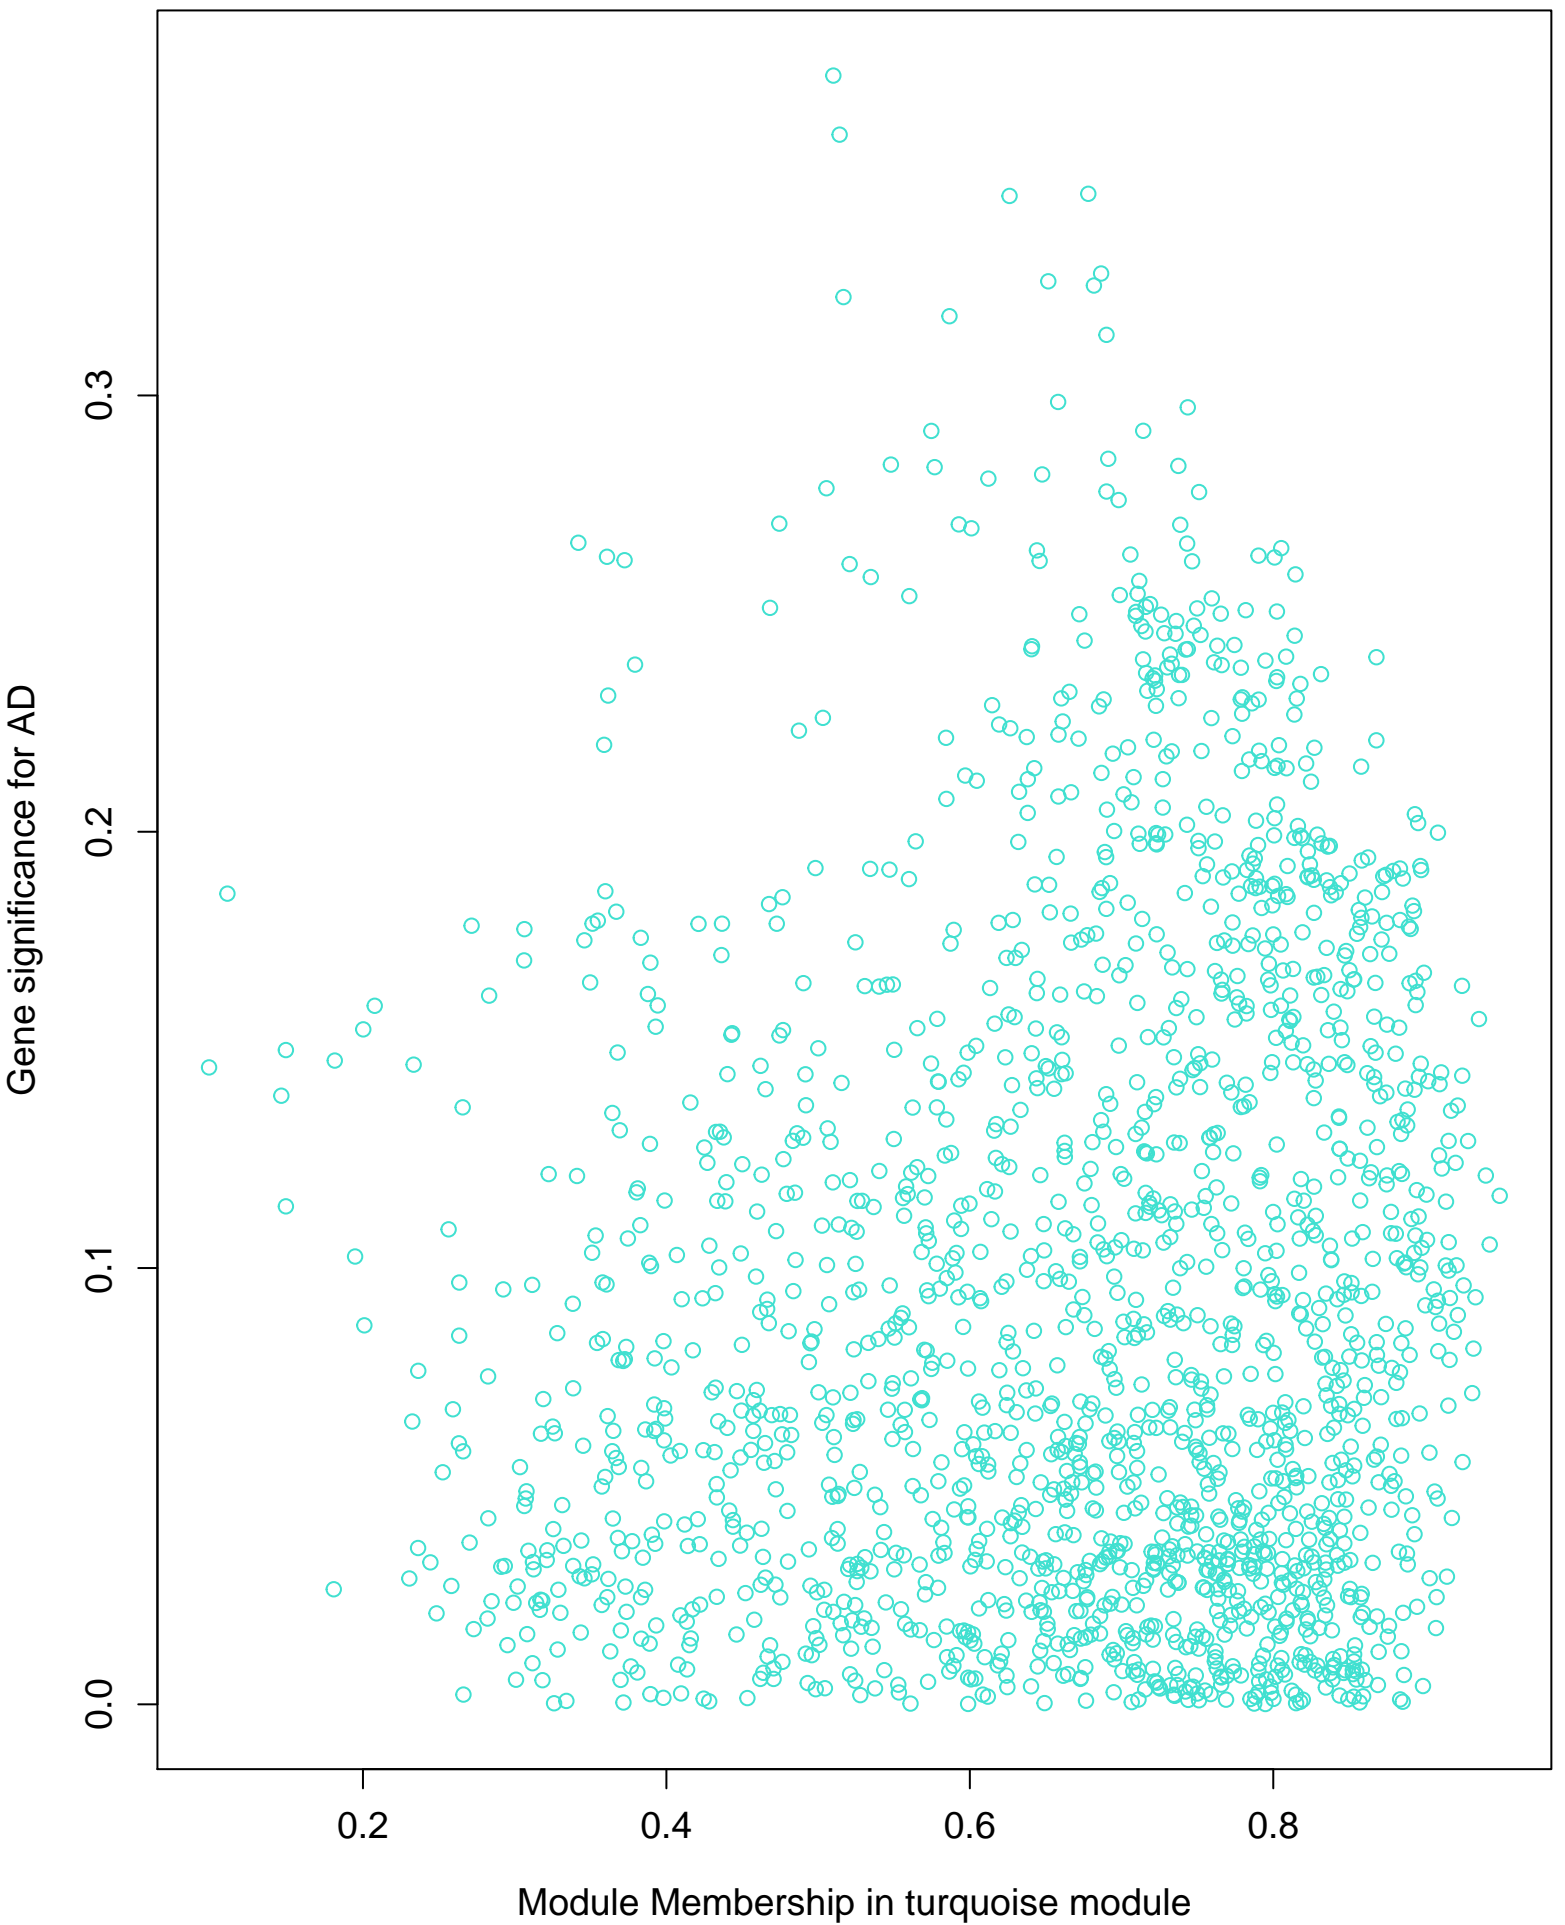

Supplement: Supplementary file 131 [file 15203375]

**Module membership vs. gene significance**  
**cor=0.61, p=1.8e-51**

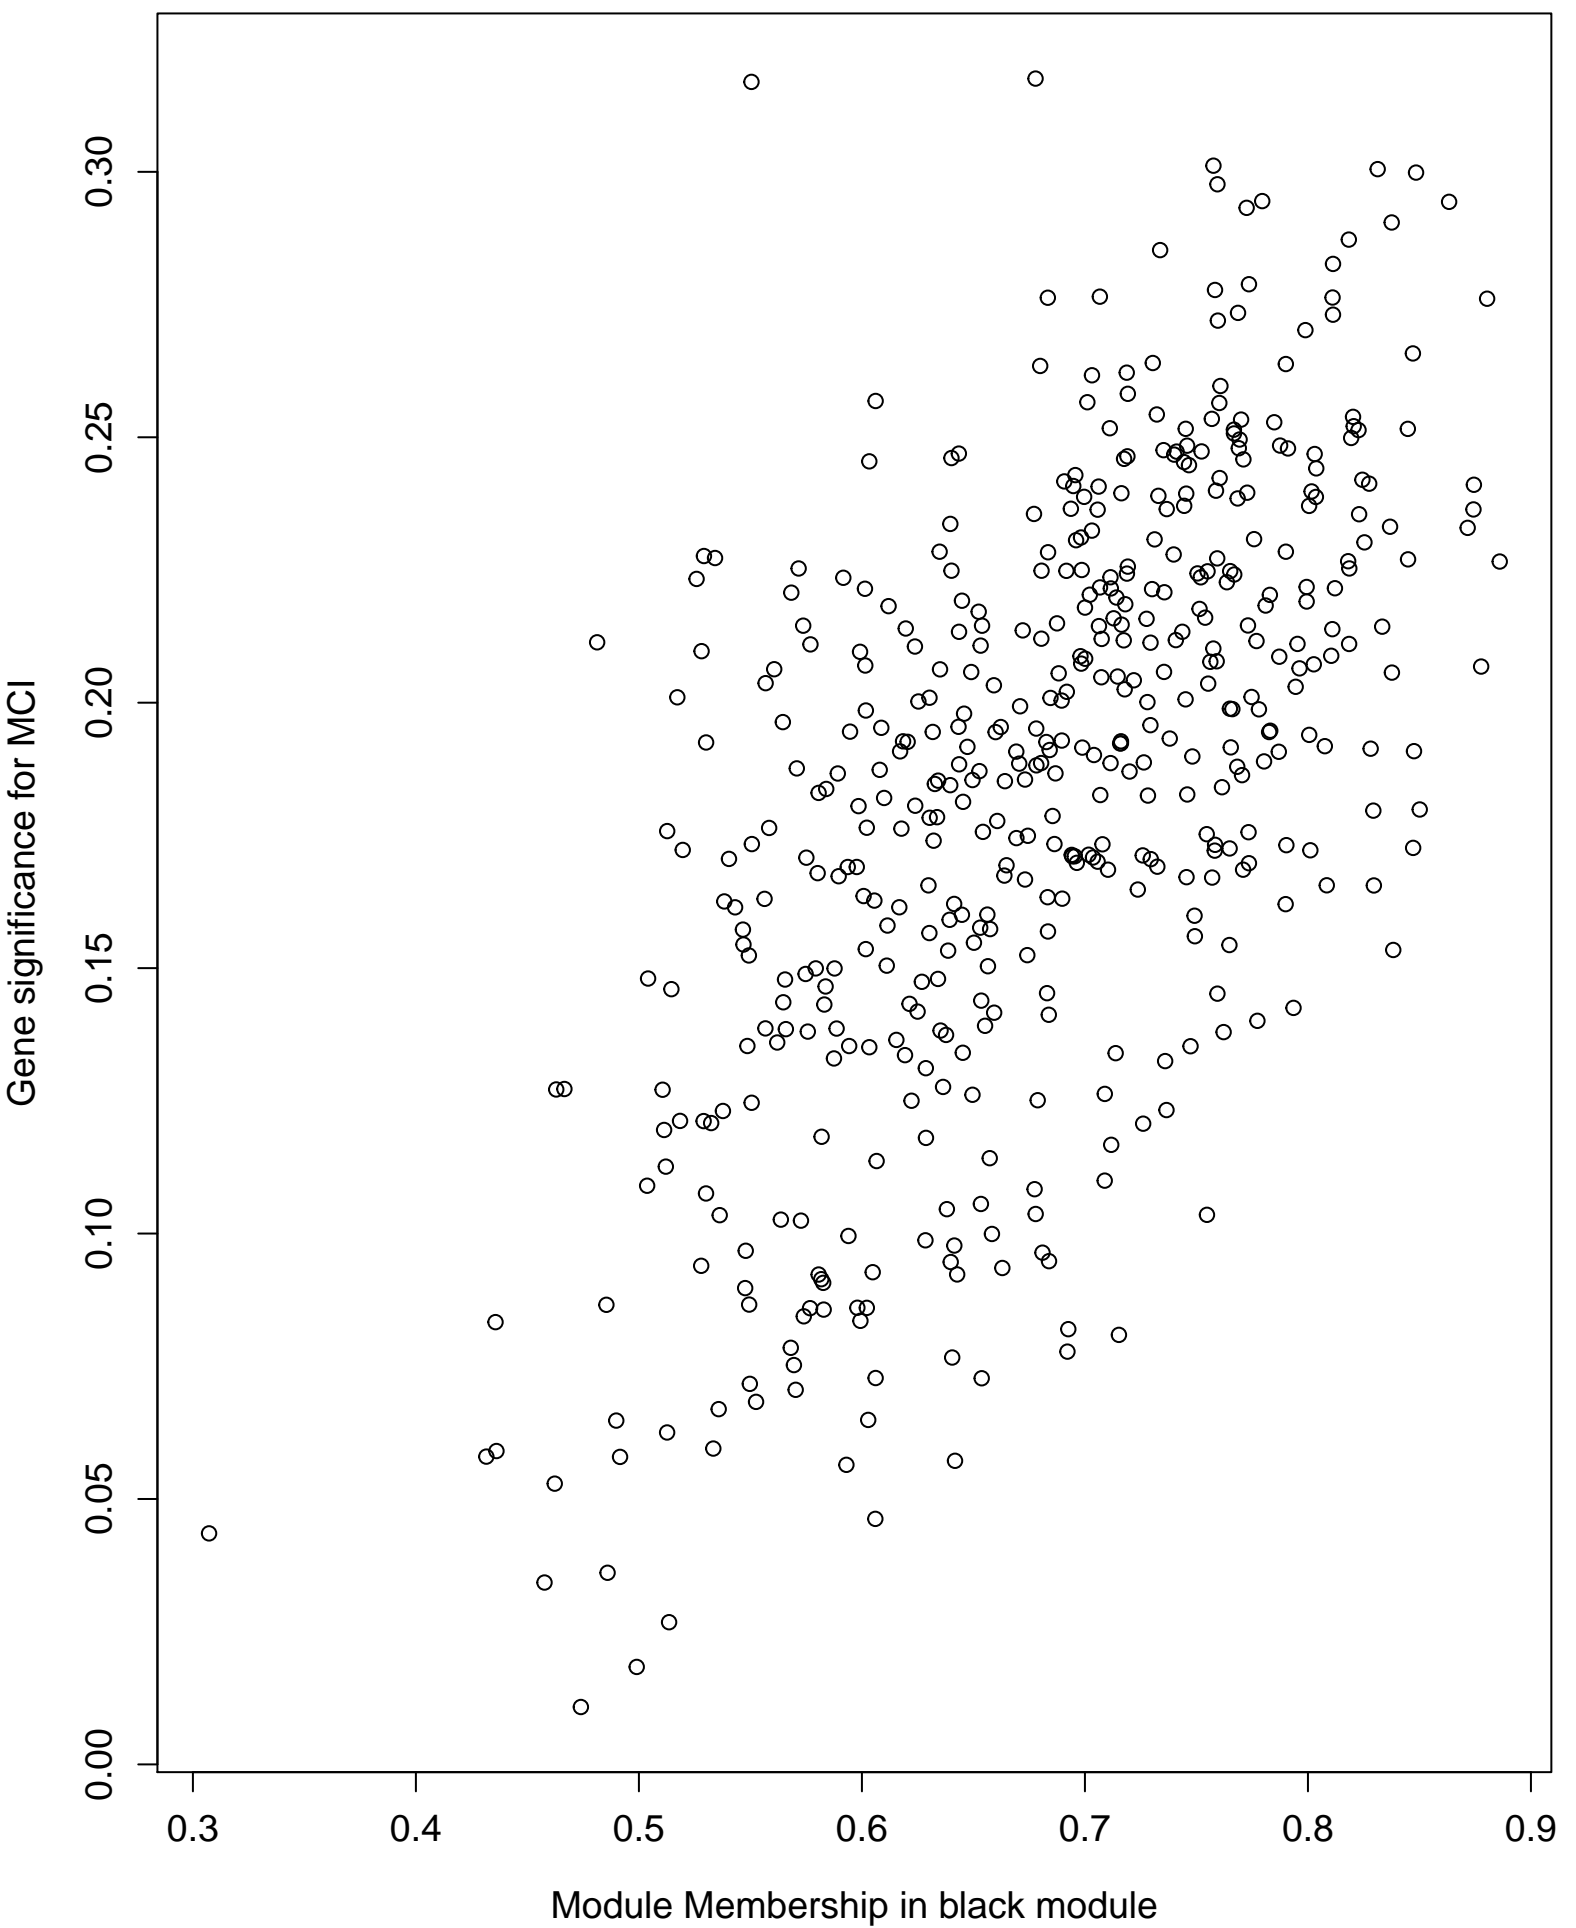

Supplement: Supplementary file 132 [file 15203375]

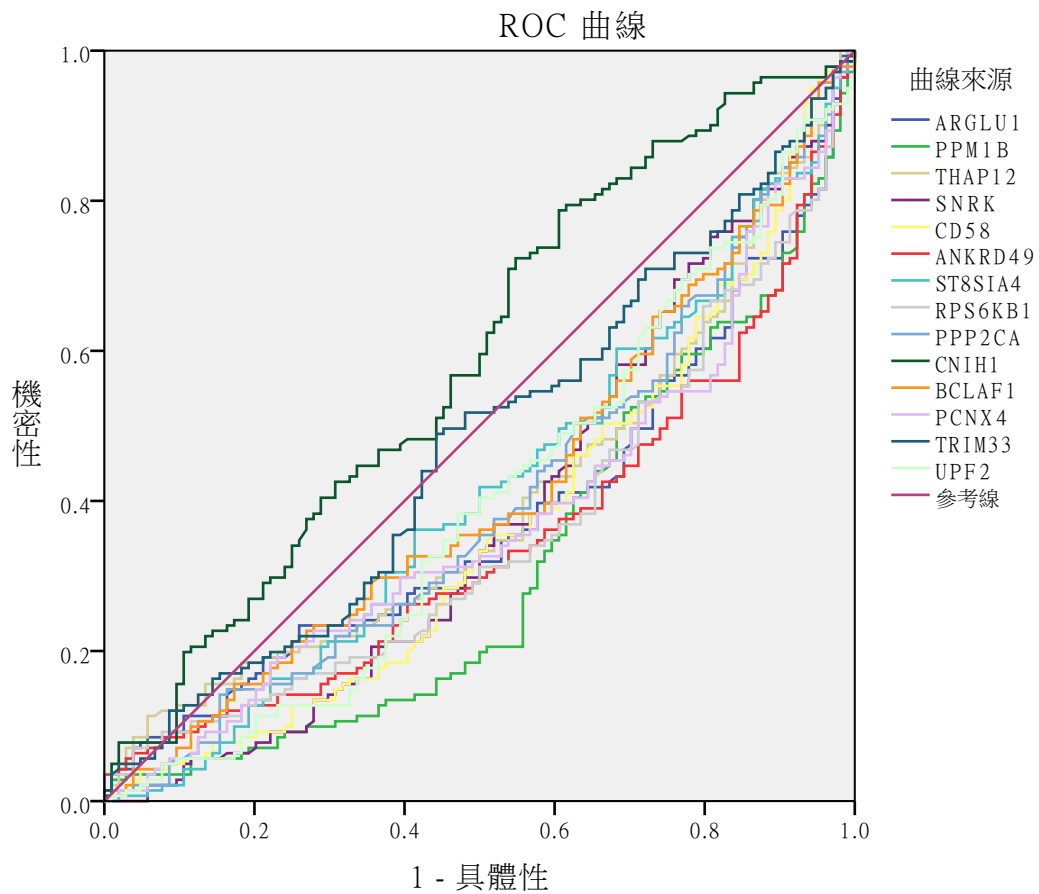

同分產生的對數區段。

Supplement: Supplementary file 134 [file 15203375]

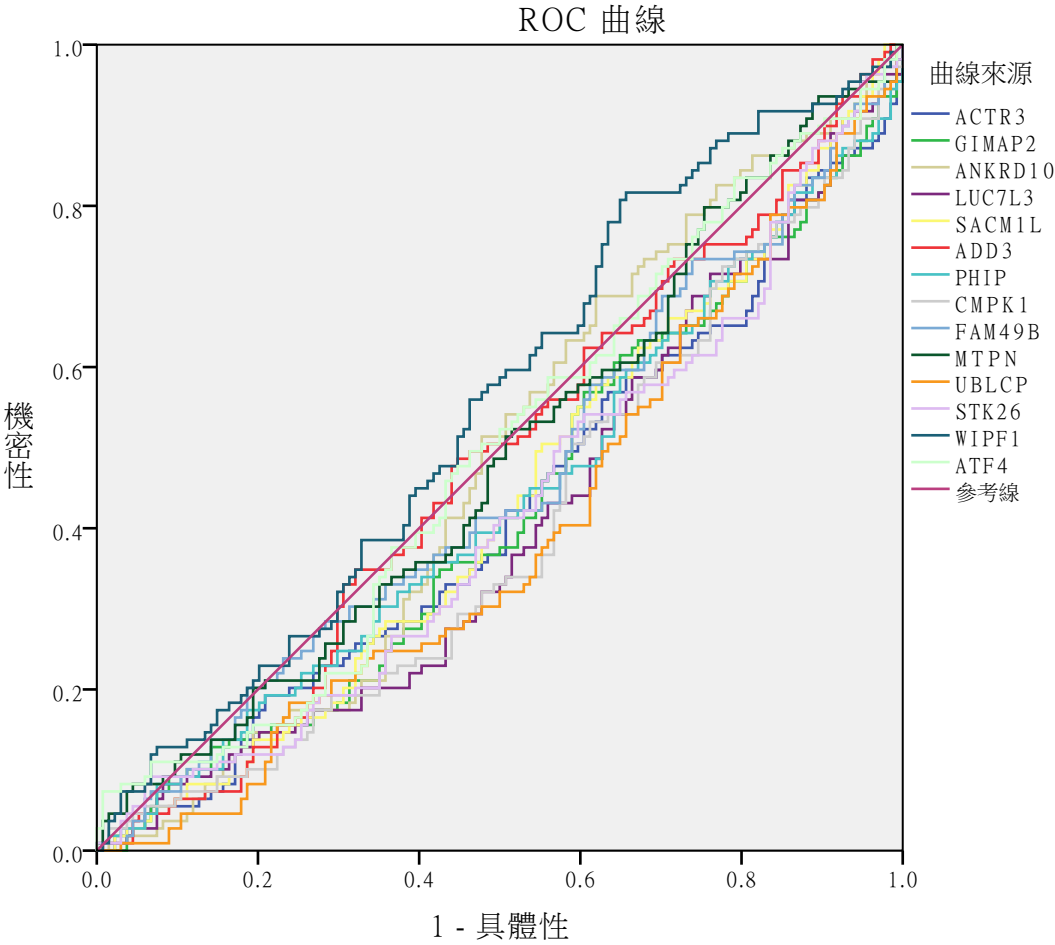

Supplement: Supplementary file 135 [file 15203375]

**Module membership vs. gene significance**  
**cor=0.35, p=1.3e-52**

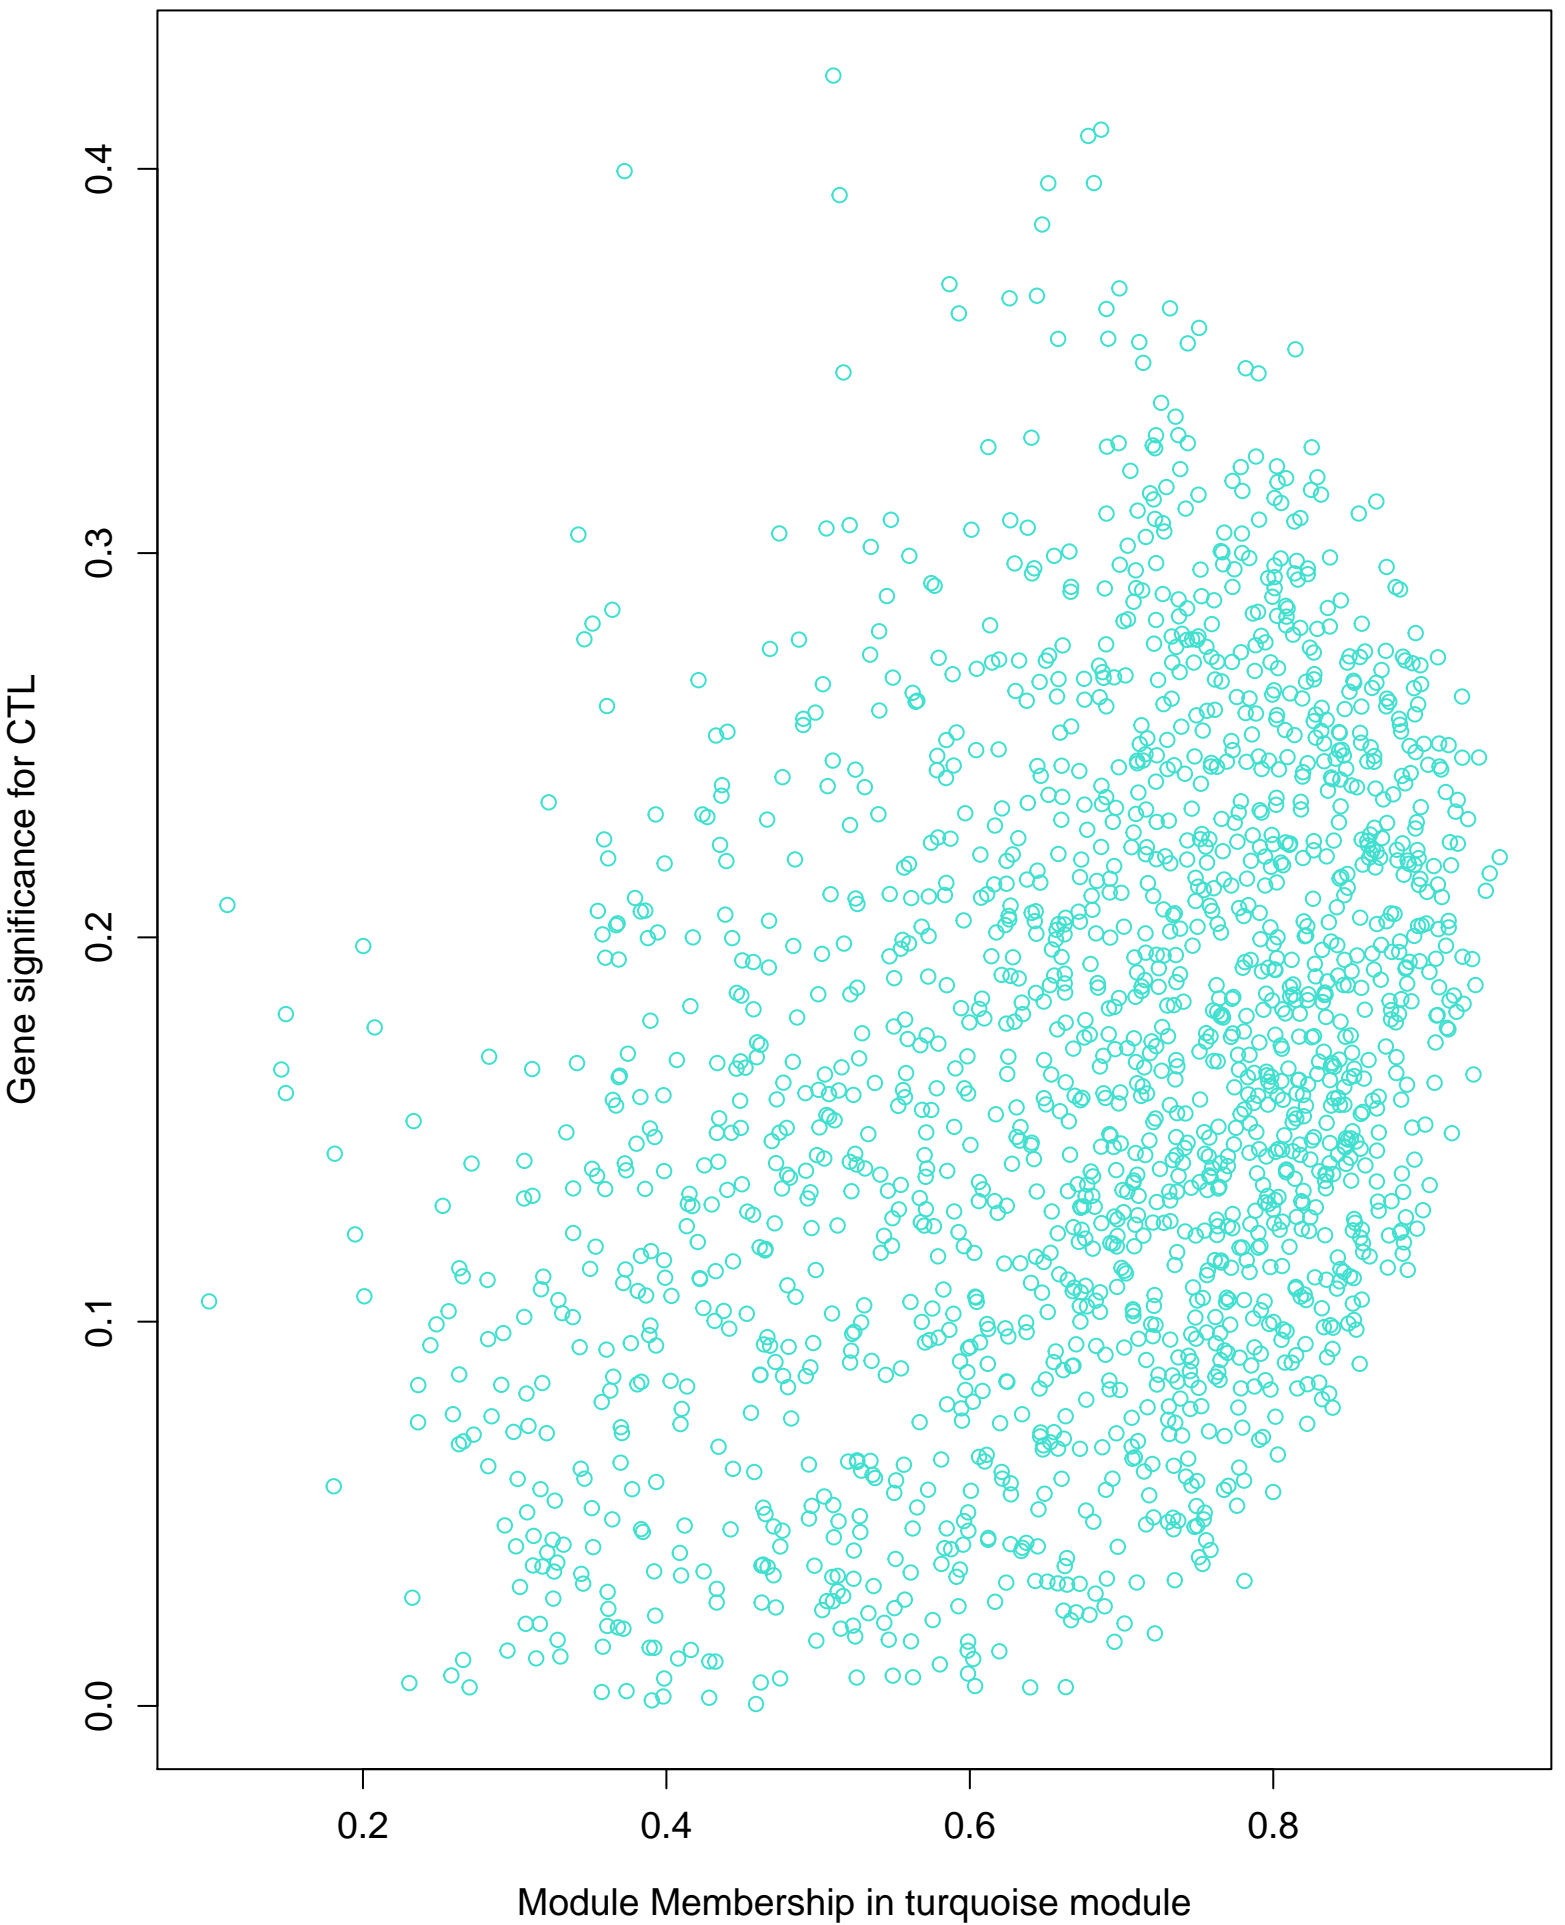

Supplement: Supplementary file 138 [file 15203375]

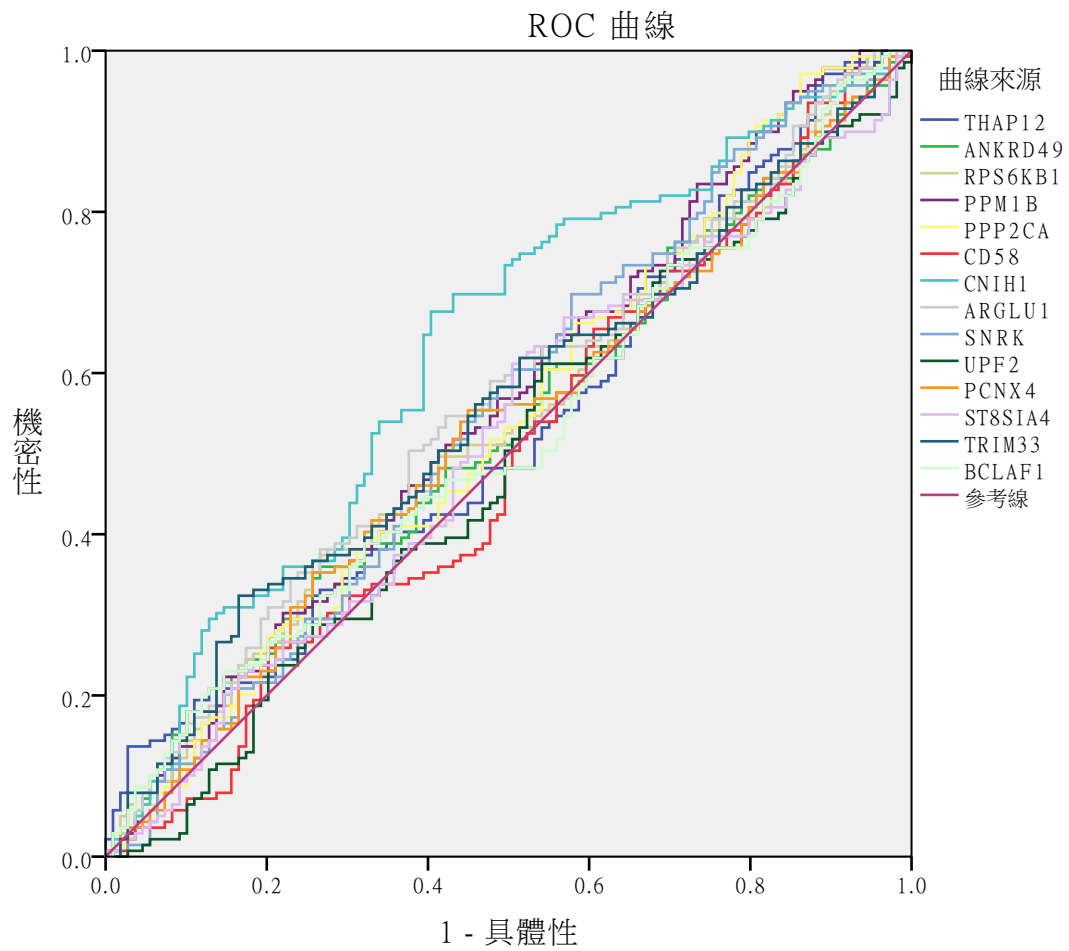

Supplement: Supplementary file 143 [file 15203375]

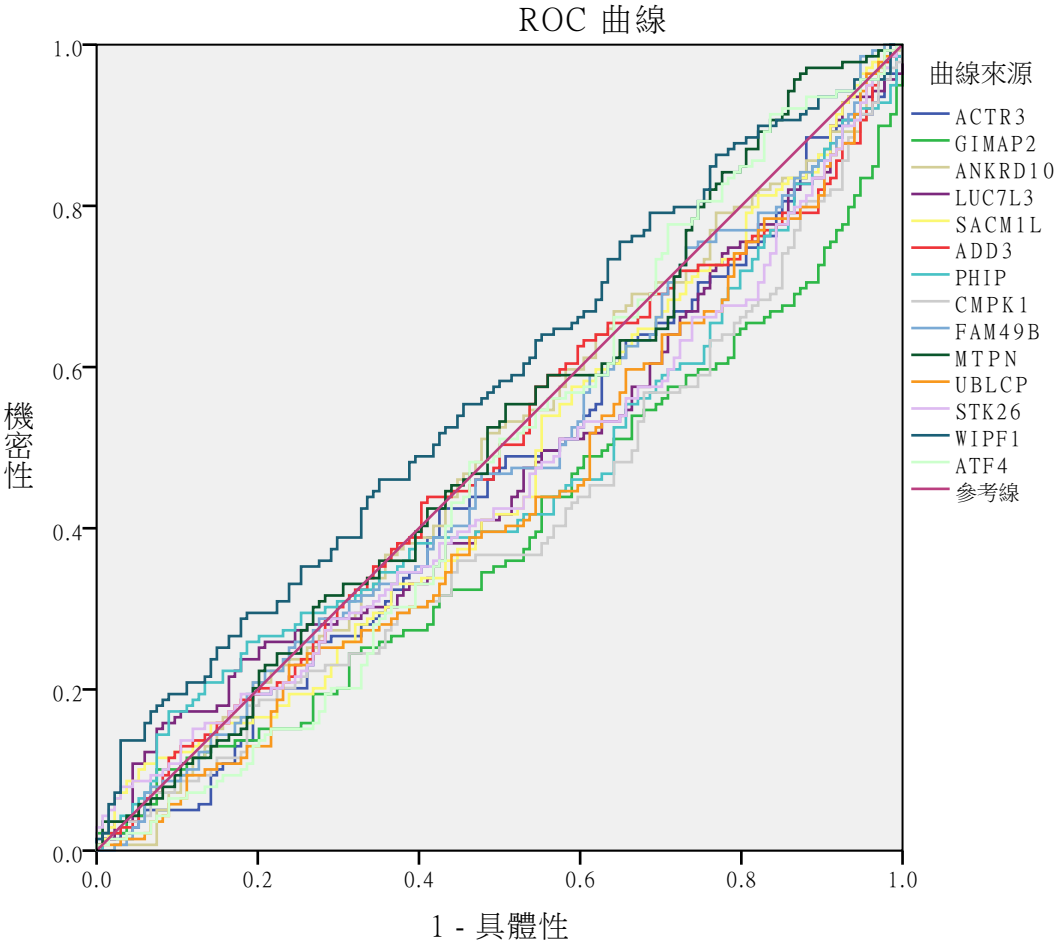

Supplement: Supplementary file 144 [file 15203375]

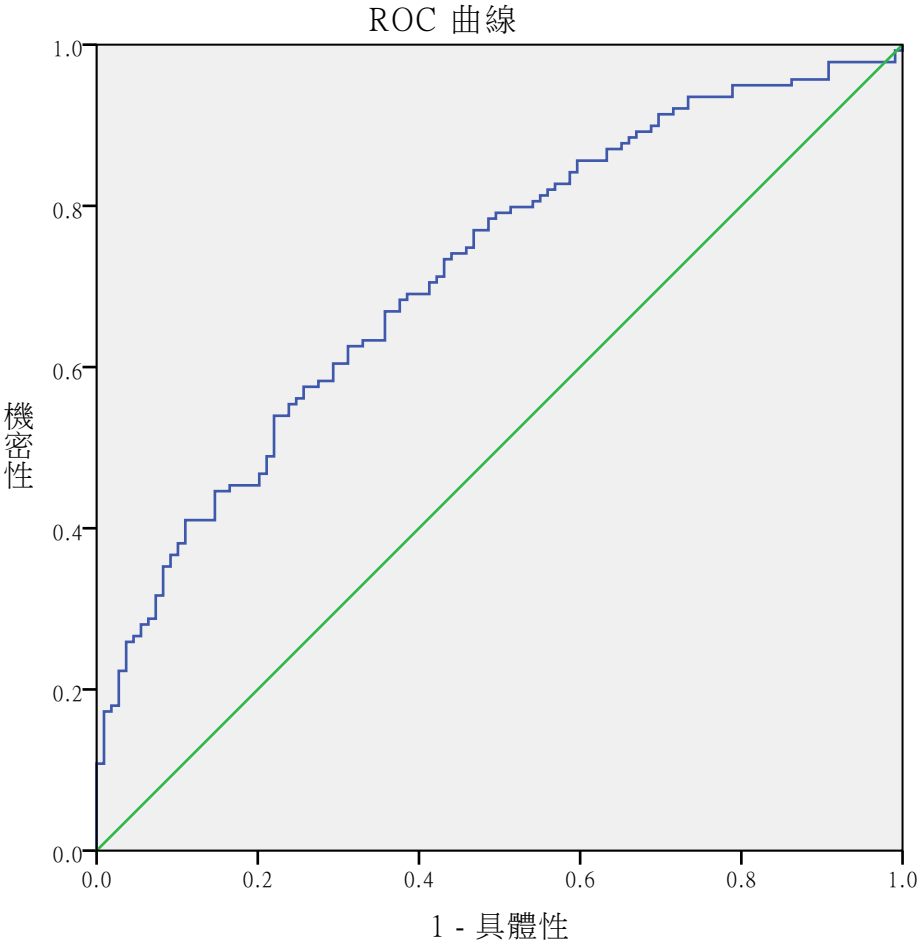

Supplement: Supplementary file 145 [file 15203375]

**Module membership vs. gene significance**  
**cor=0.51, p=2.2e-79**

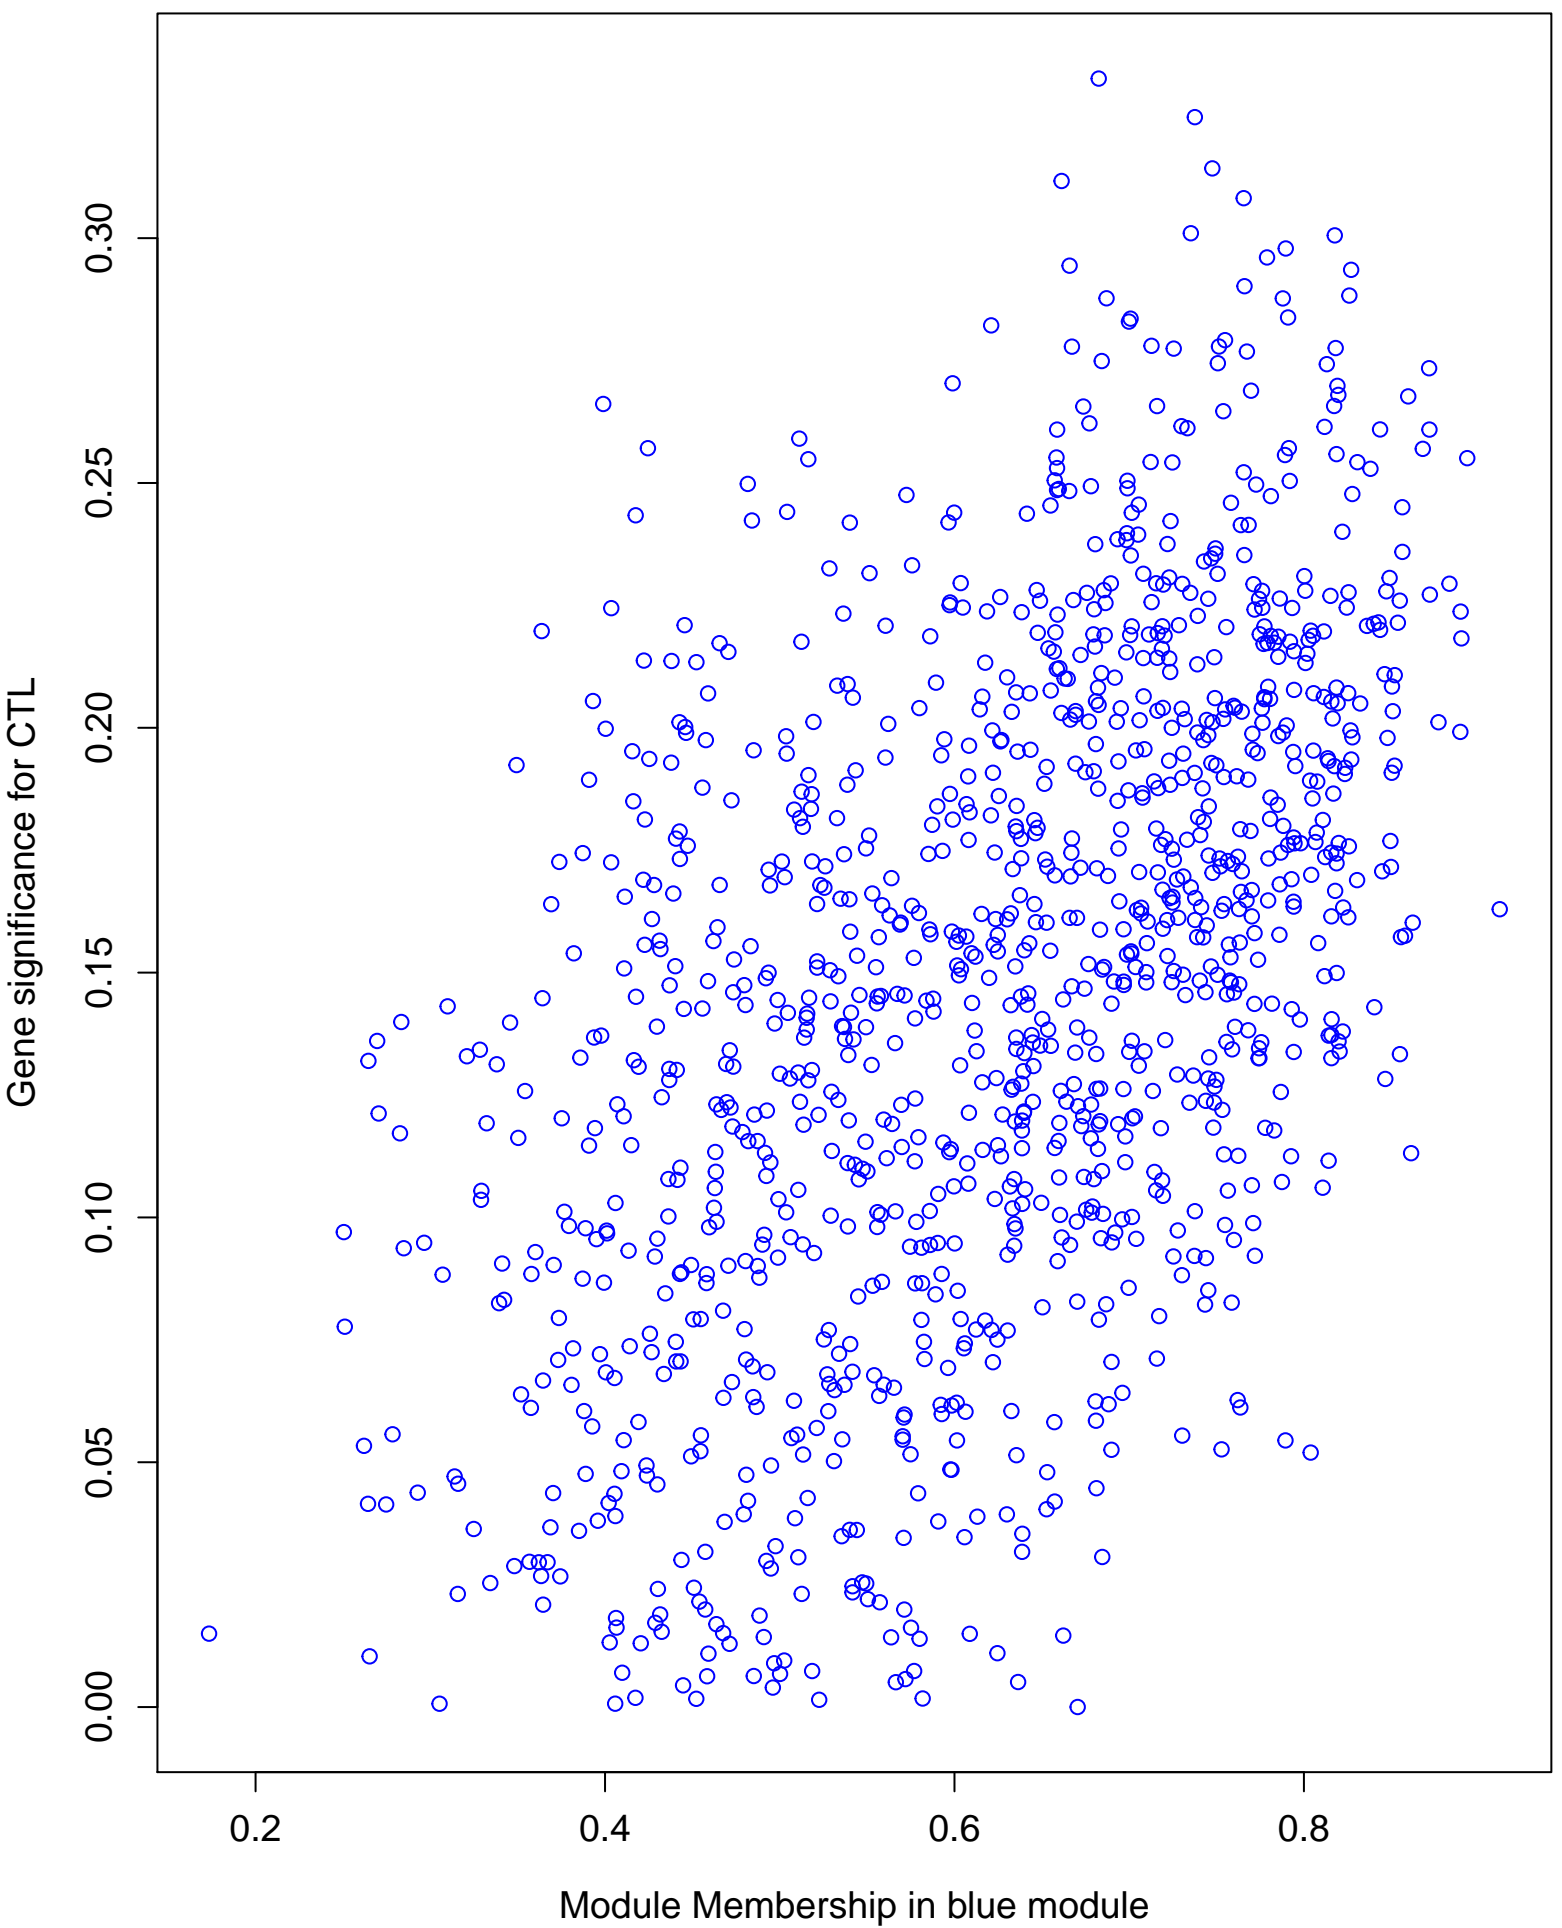

Supplement: Supplementary file 147 [file 15203375]

**Module membership vs. gene significance**  
**cor=0.4, p=3e-39**

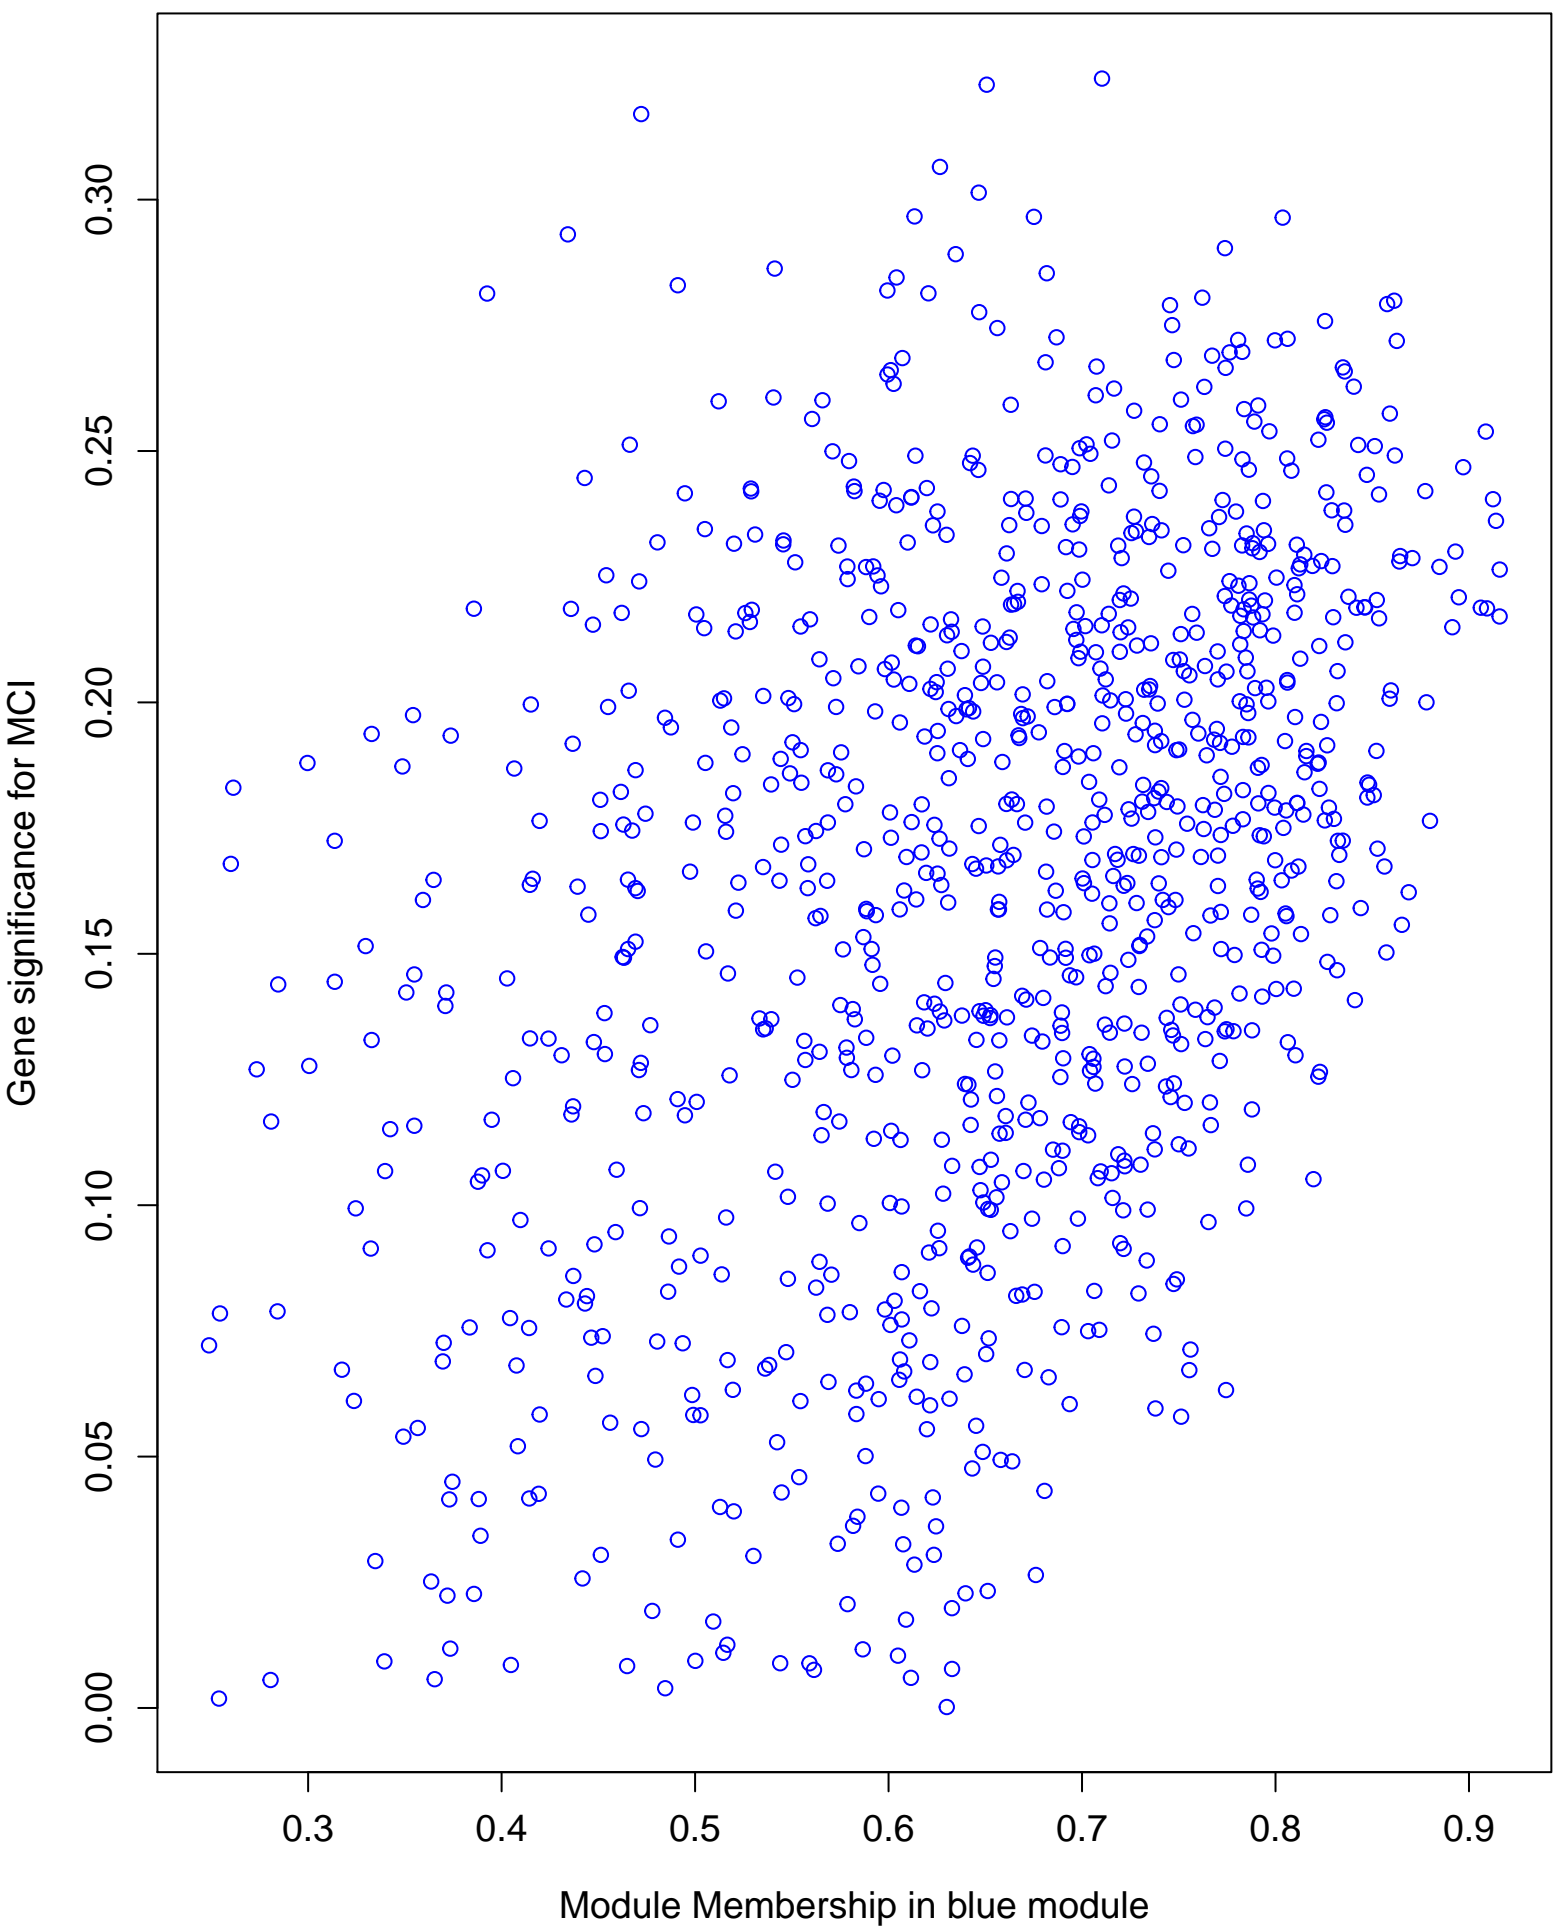

Supplement: Supplementary file 149 [file 15203375]

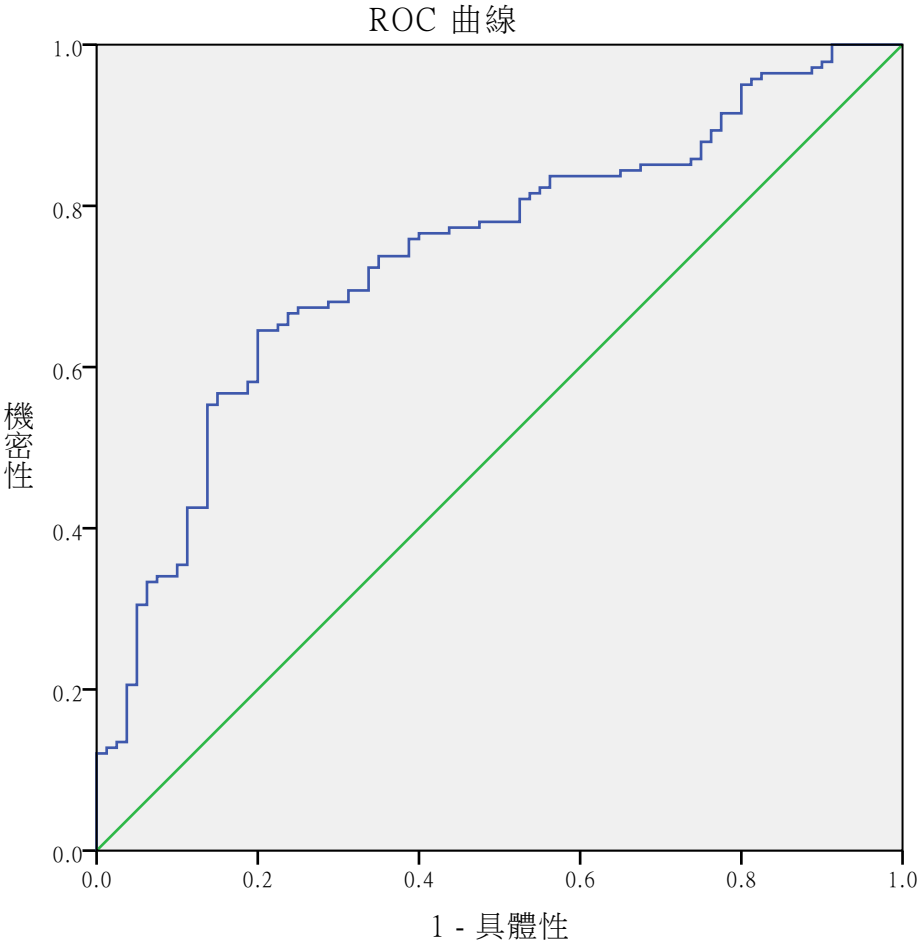

Supplement: Supplementary file 150 [file 15203375]

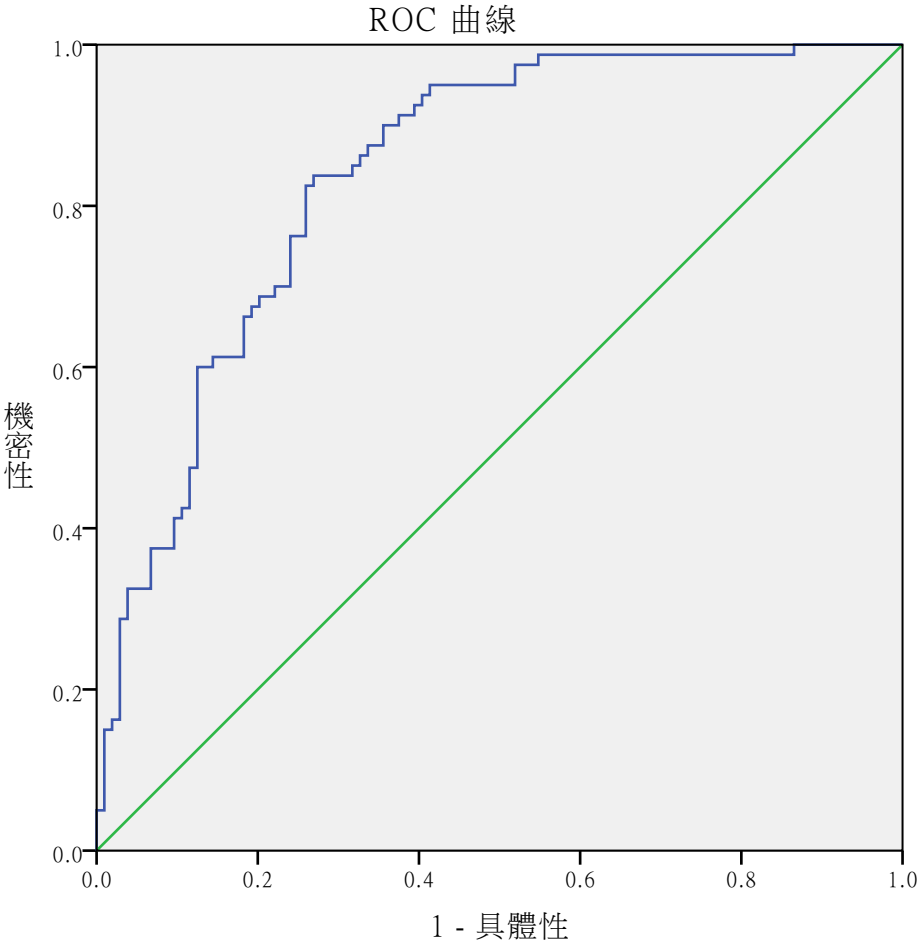

Supplement: Supplementary file 152 [file 15203375]

**Module membership vs. gene significance**  
**cor=0.03, p=0.67**

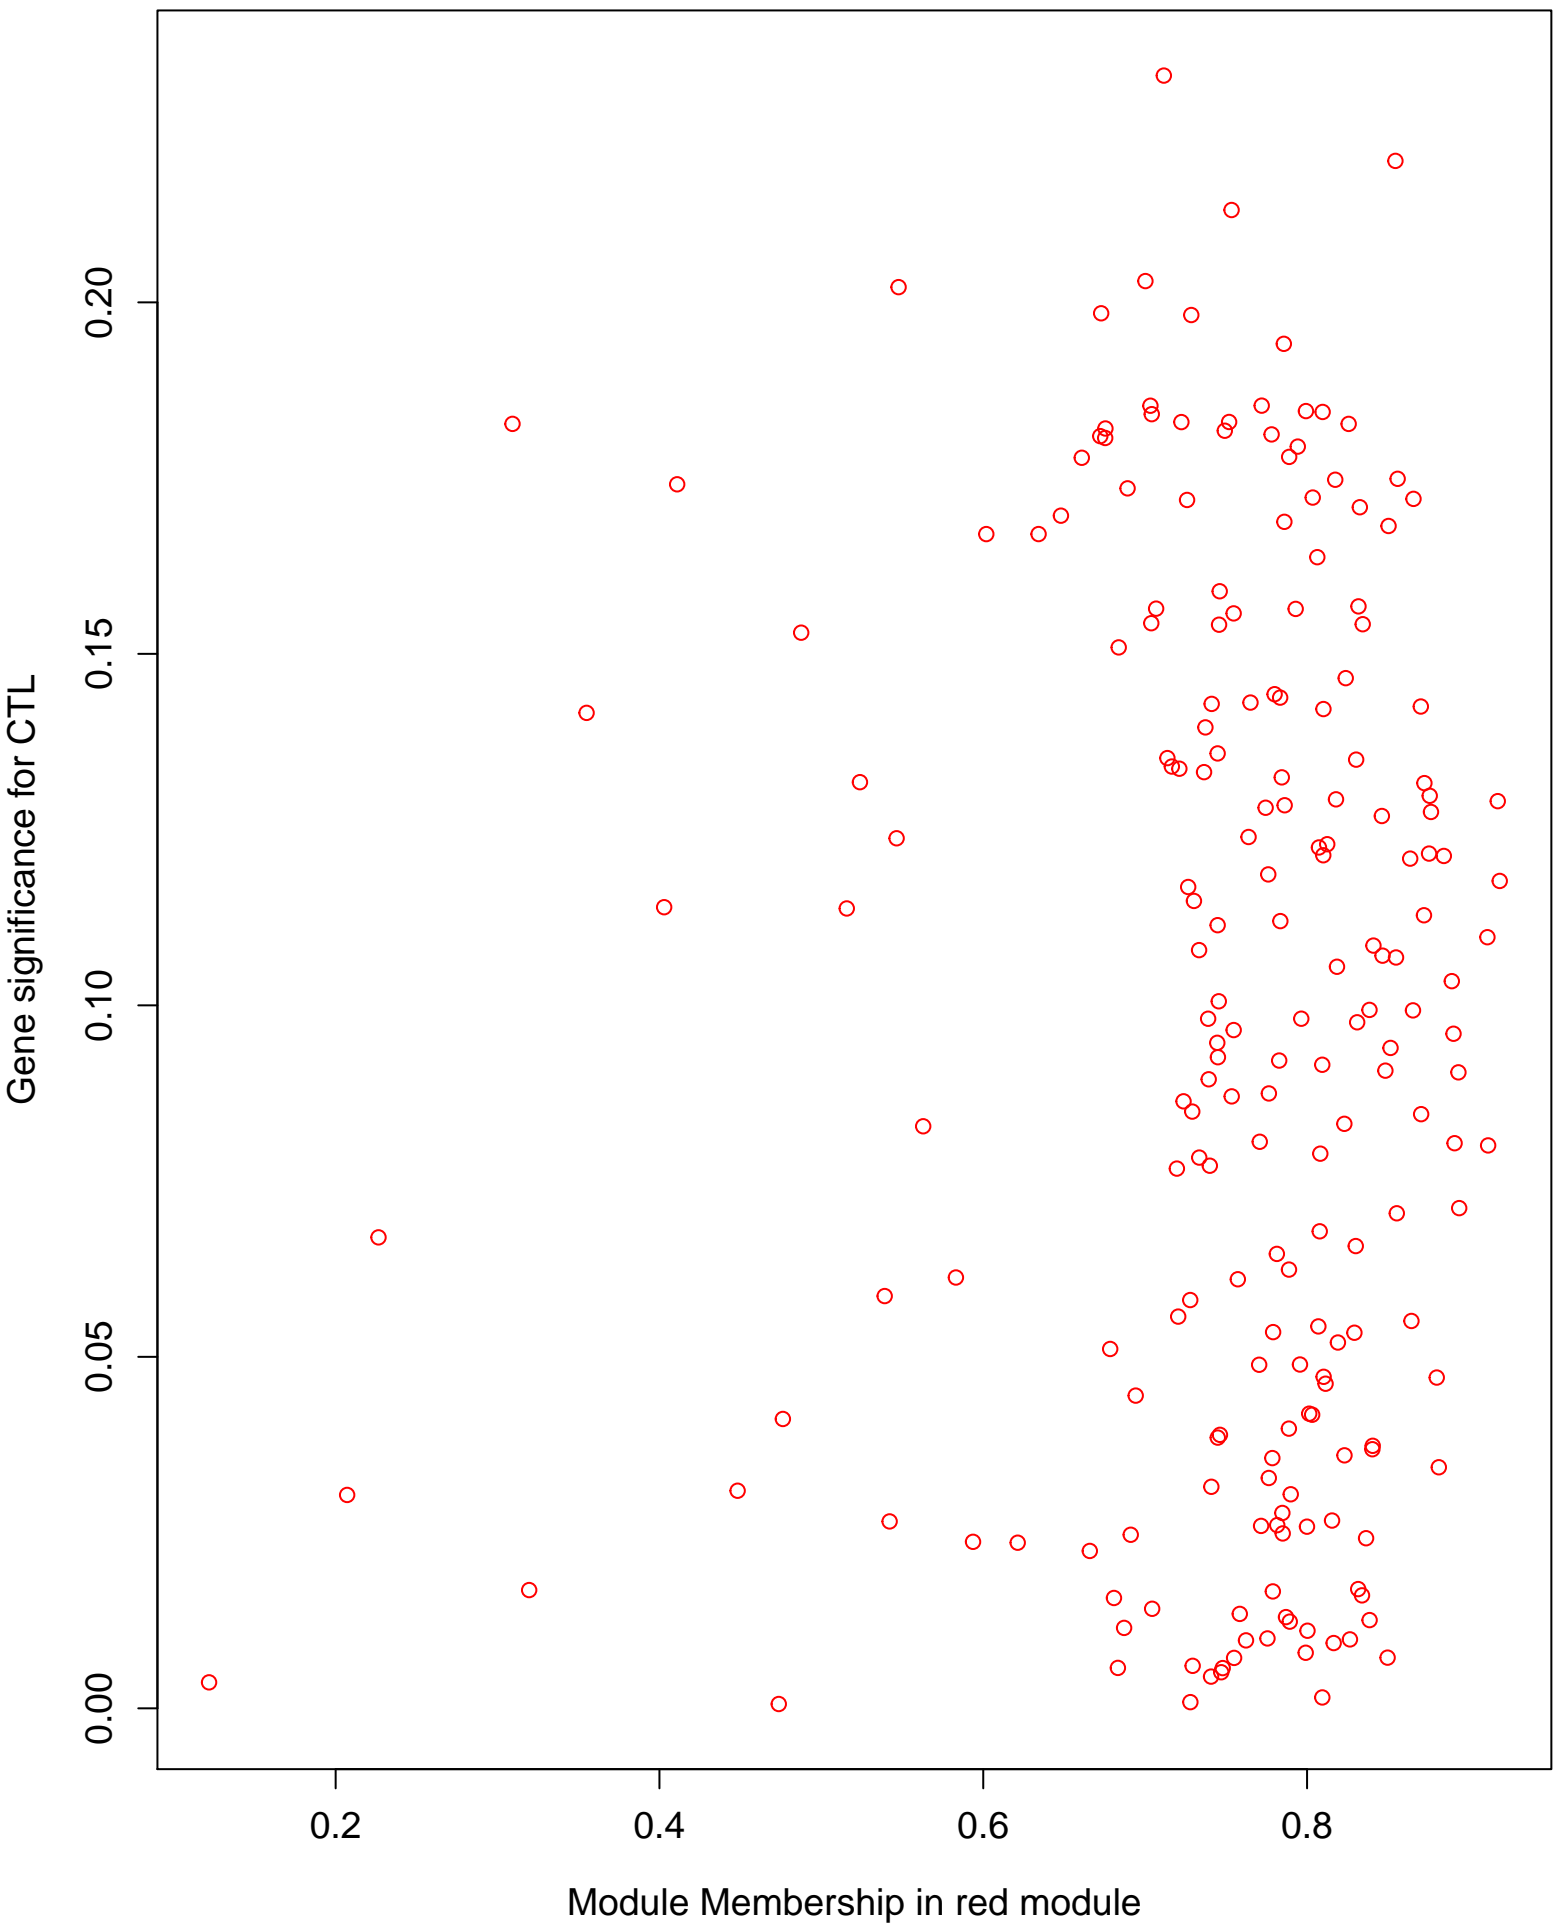

Supplement: Supplementary file 153 [file 15203375]

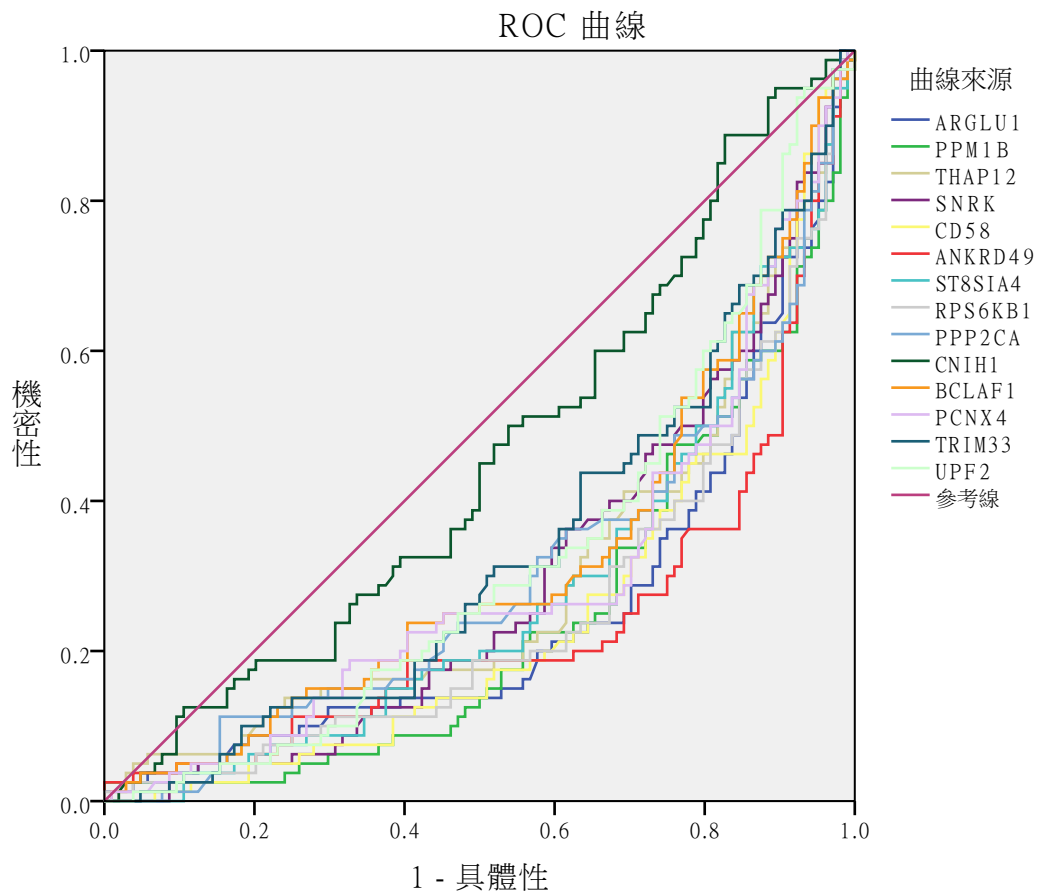

同分產生的對數區段。

Supplement: Supplementary file 154 [file 15203375]

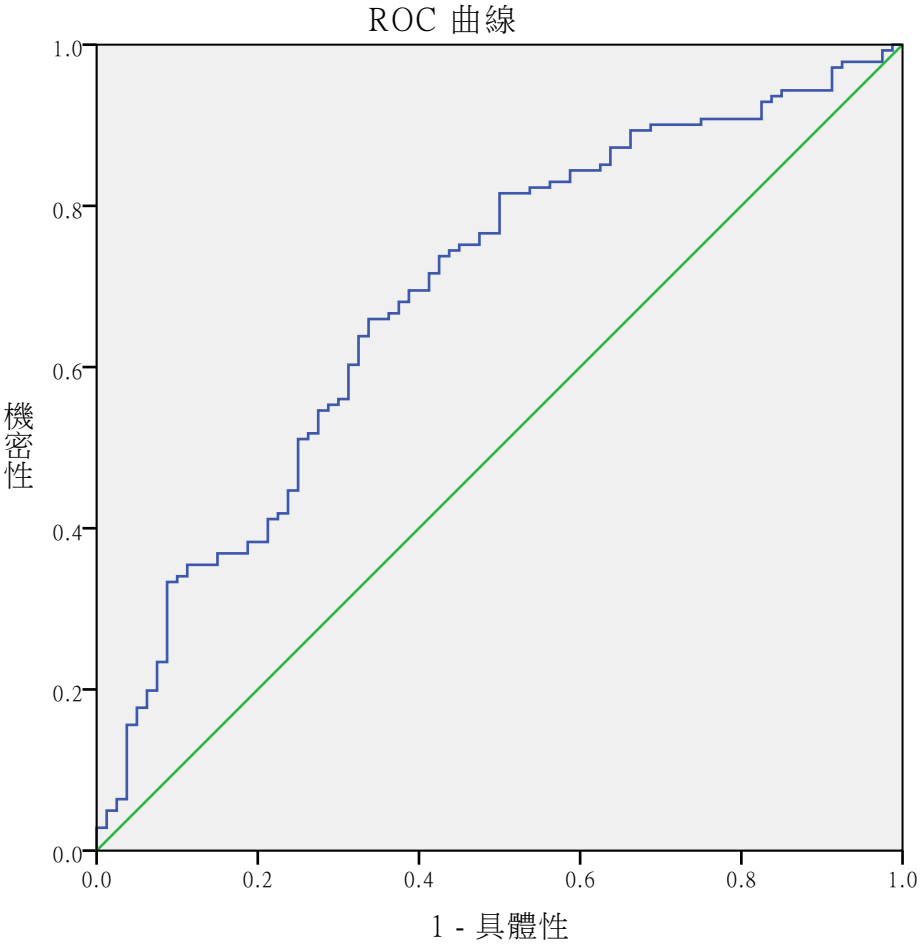

Supplement: Supplementary file 156 [file 15203375]

**Module membership vs. gene significance**  
**cor=0.65, p=1.4e-119**

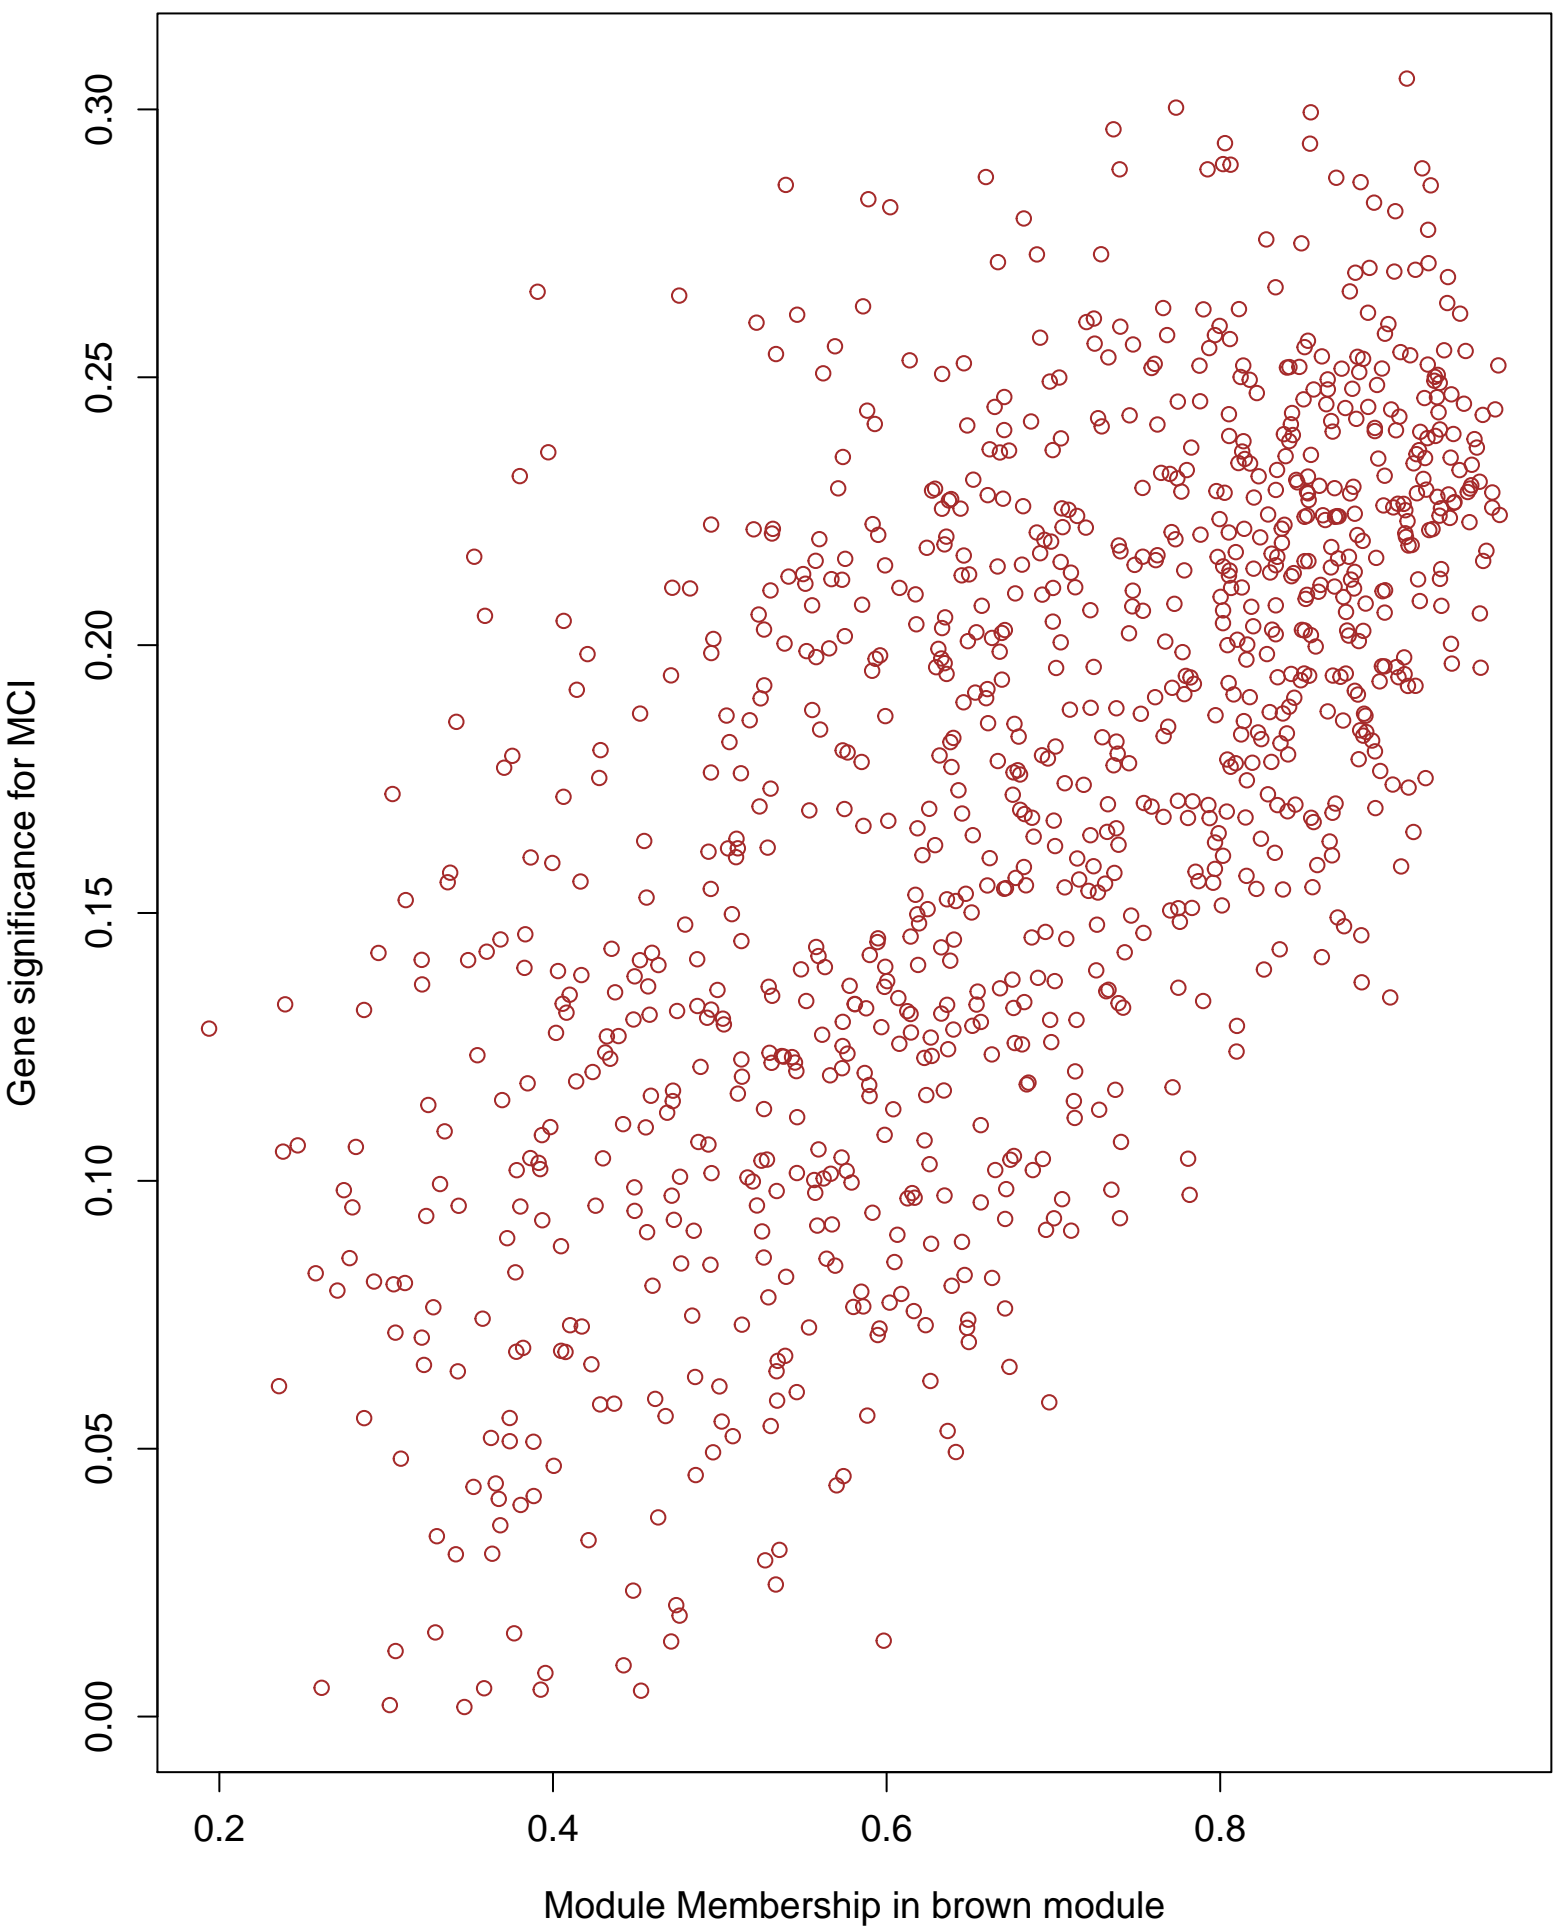

Supplement: Supplementary file 157 [file 15203375]

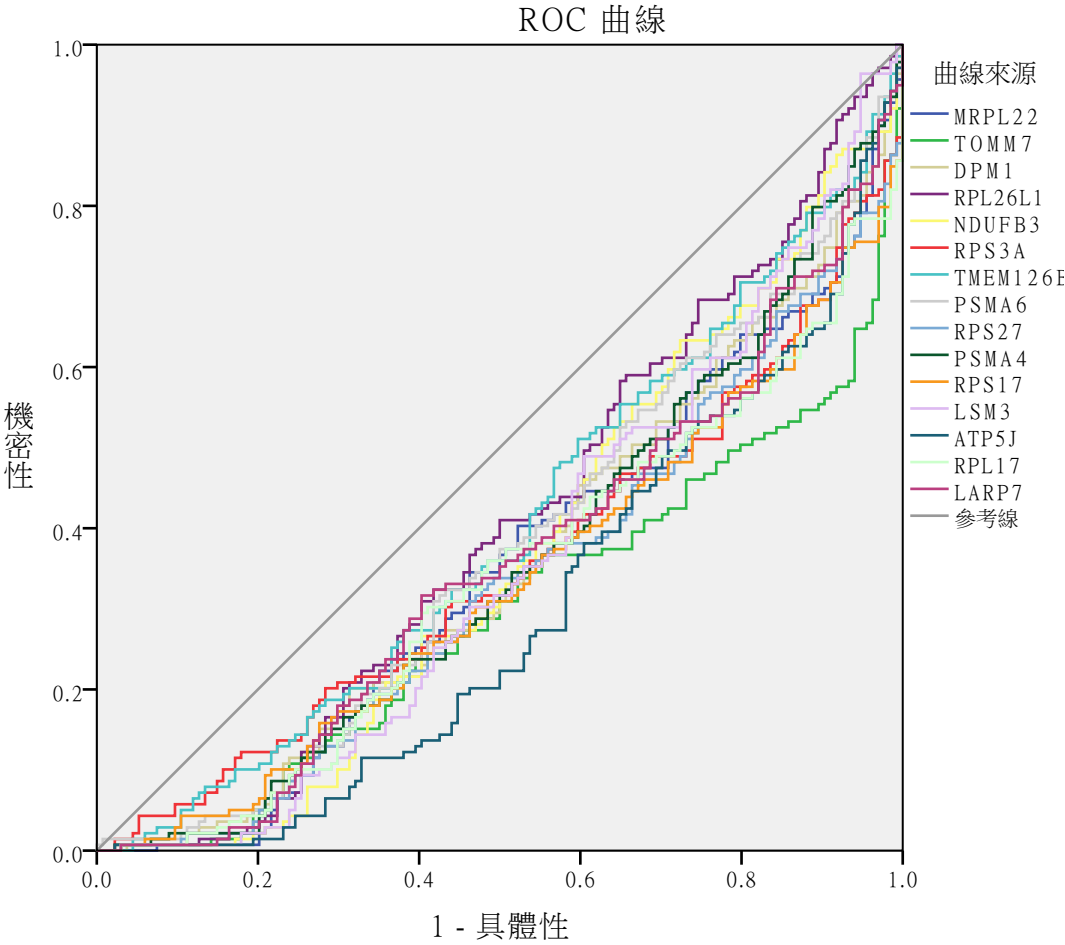

Supplement: Supplementary file 158 [file 15203375]

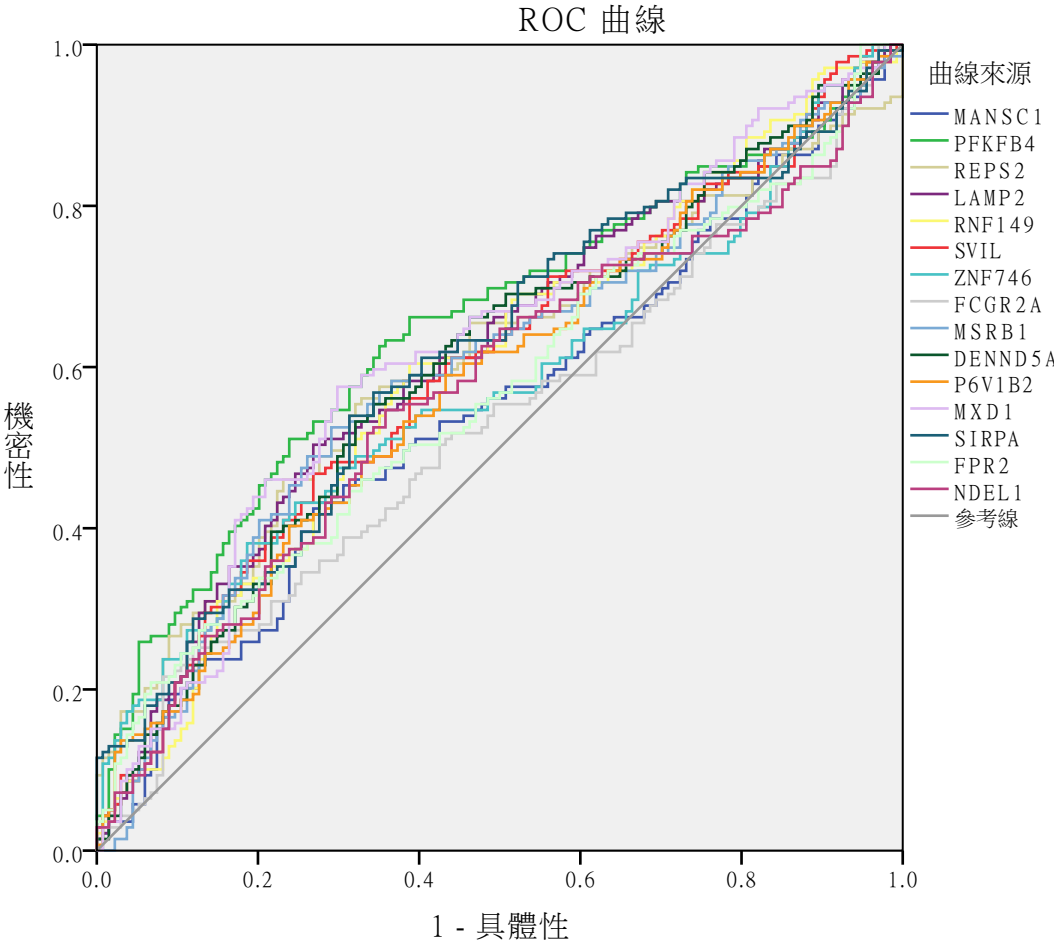

Supplement: Supplementary file 159 [file 15203375]

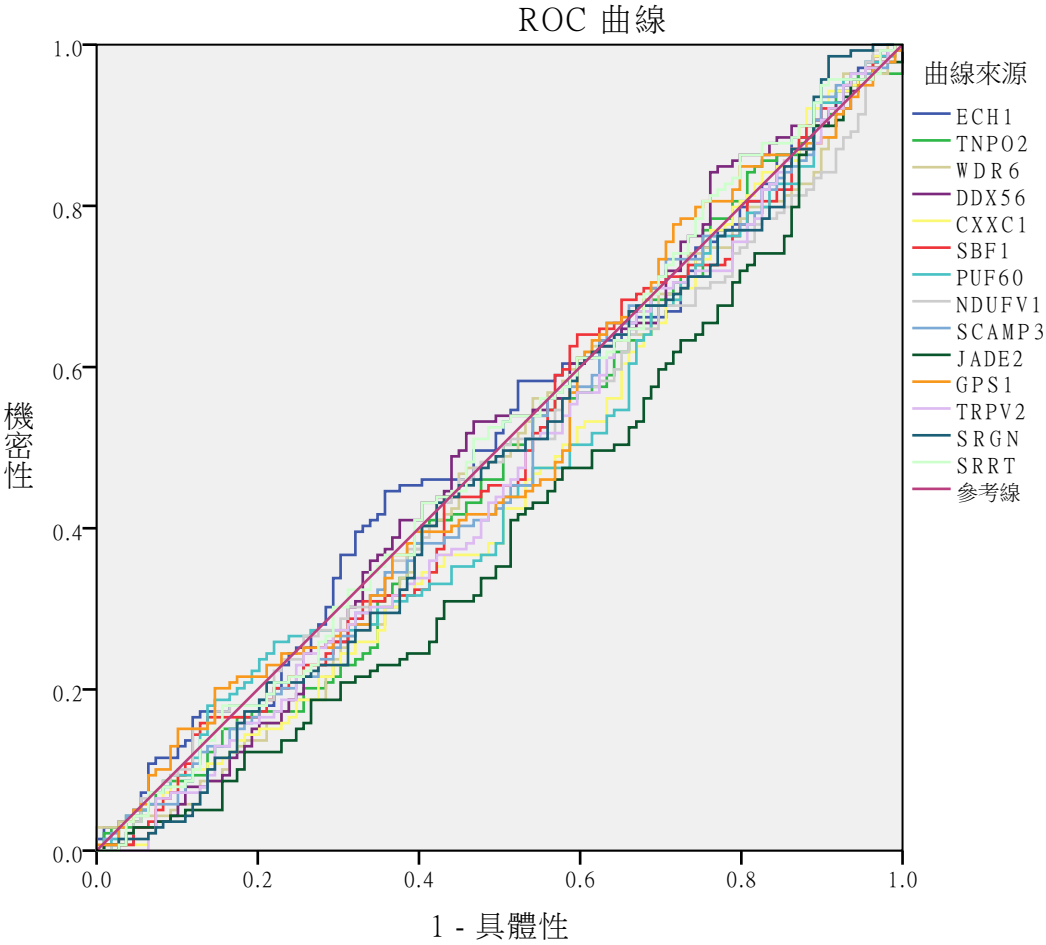

Supplement: Supplementary file 161 [file 15203375]

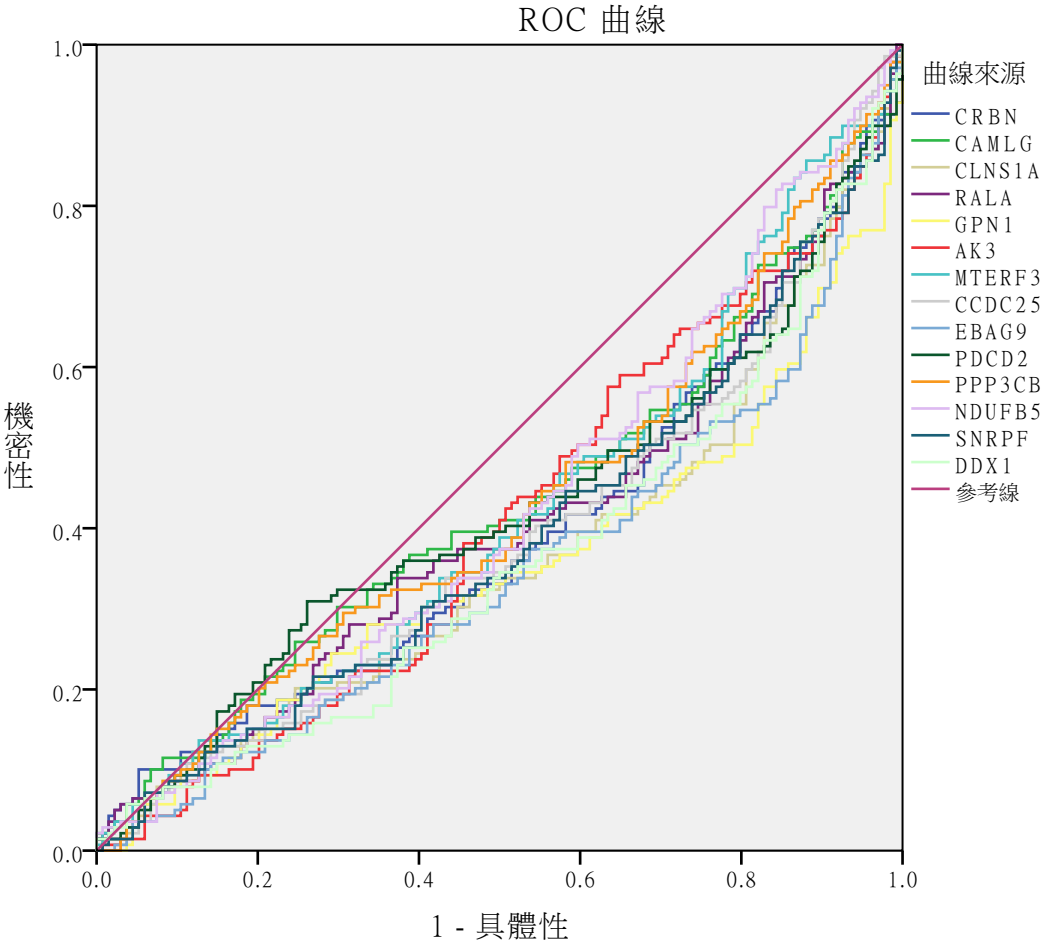

Supplement: Supplementary file 162 [file 15203375]

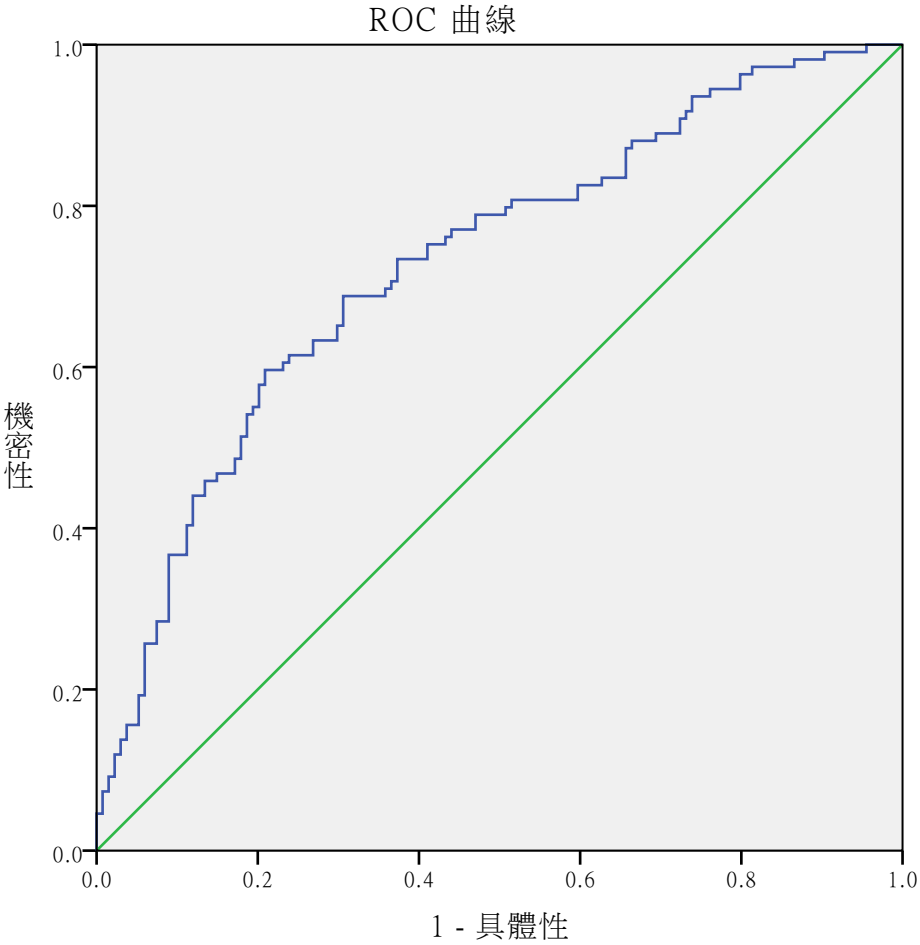

Supplement: Supplementary file 163 [file 15203375]

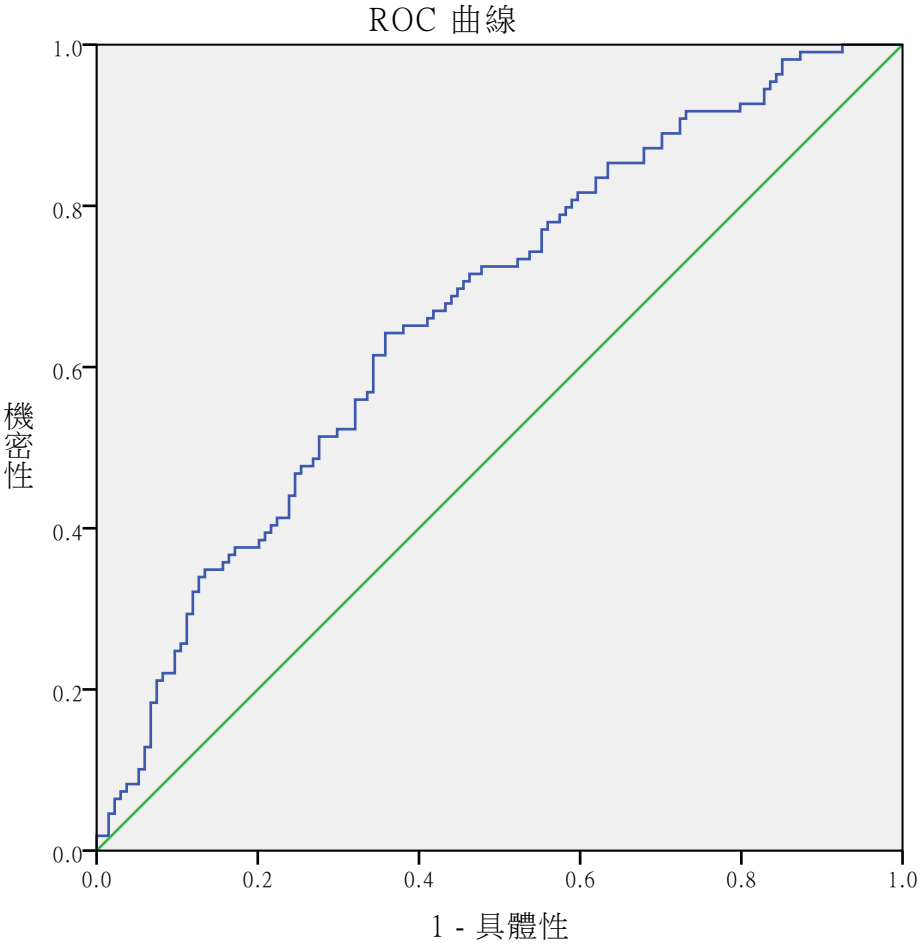

Supplement: Supplementary file 164 [file 15203375]

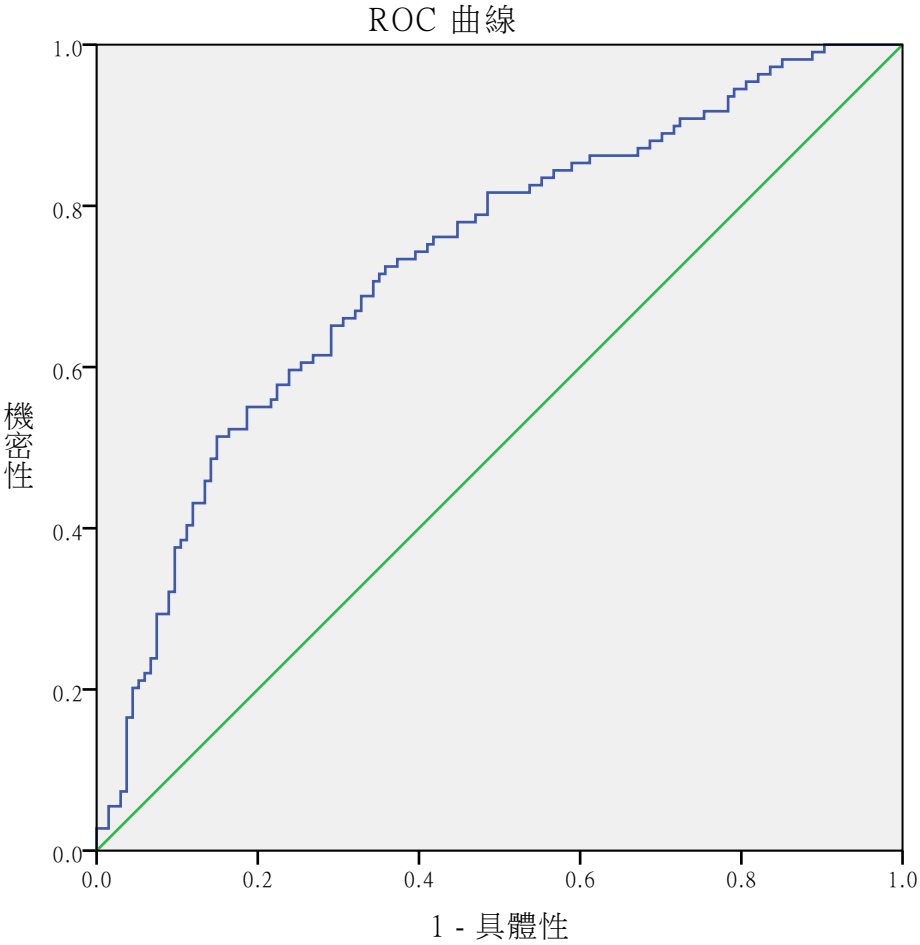

Supplement: Supplementary file 165 [file 15203375]

**Module membership vs. gene significance**  
**cor=0.64, p=2.2e-132**

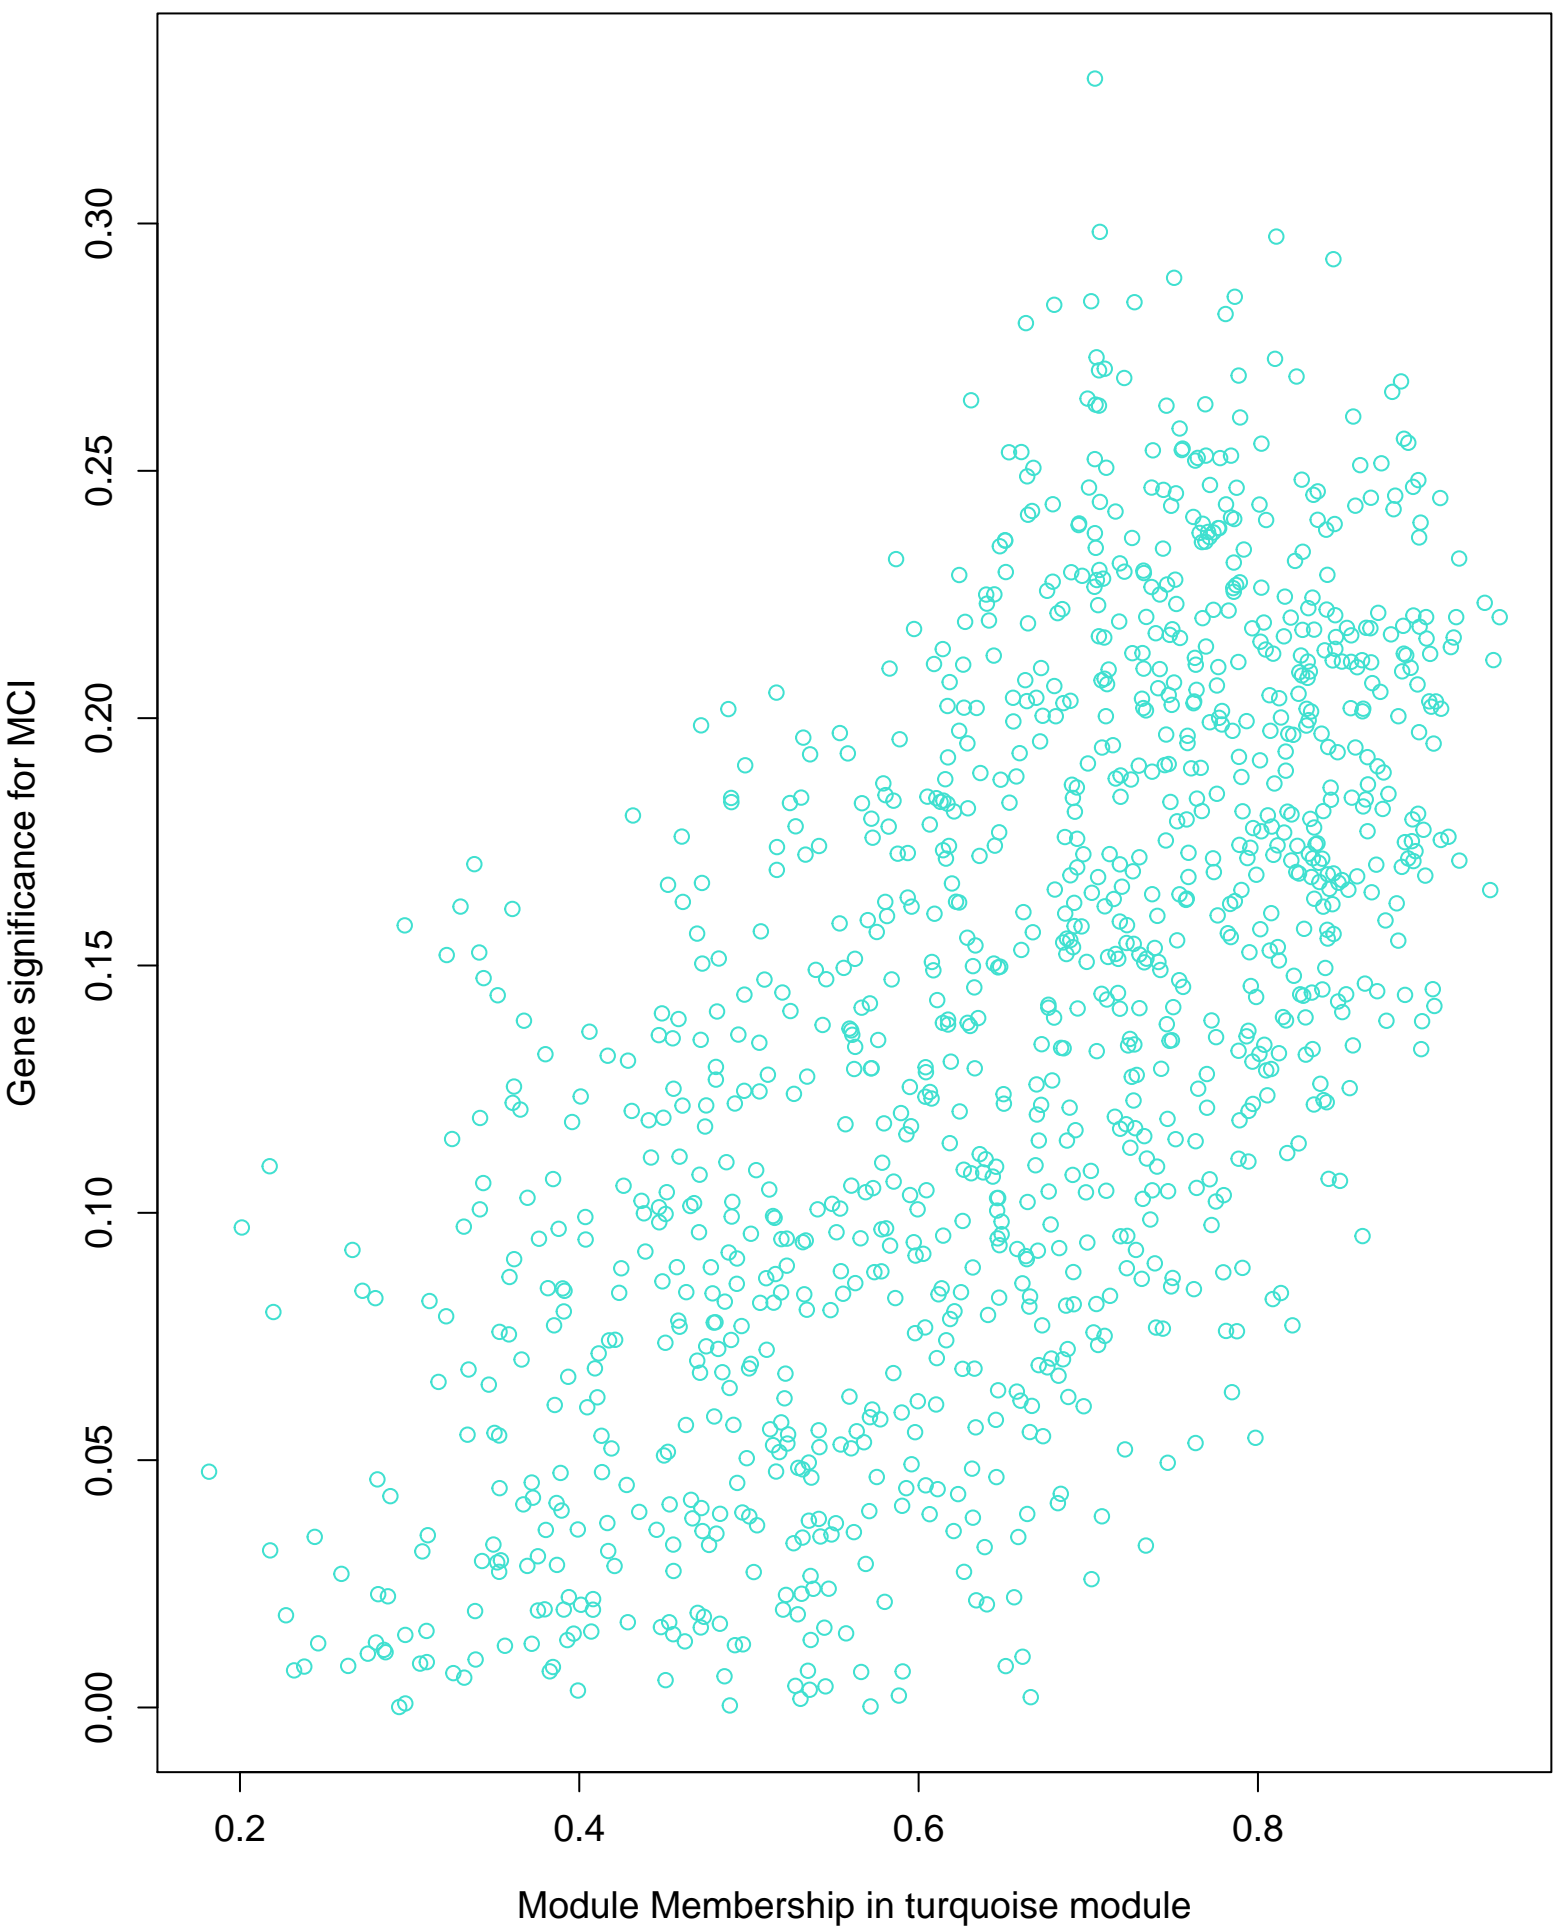

Supplement: Supplementary file 166 [file 15203375]

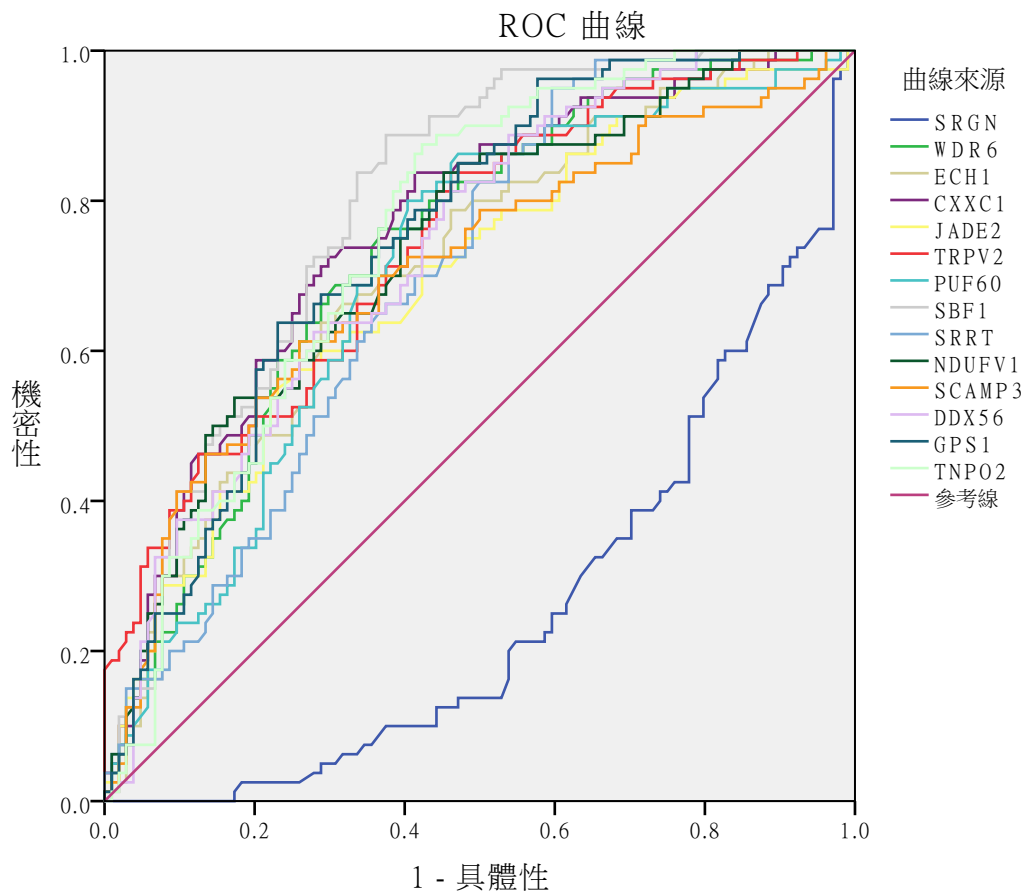

同分產生的對數區段。

Supplement: Supplementary file 169 [file 15203375]

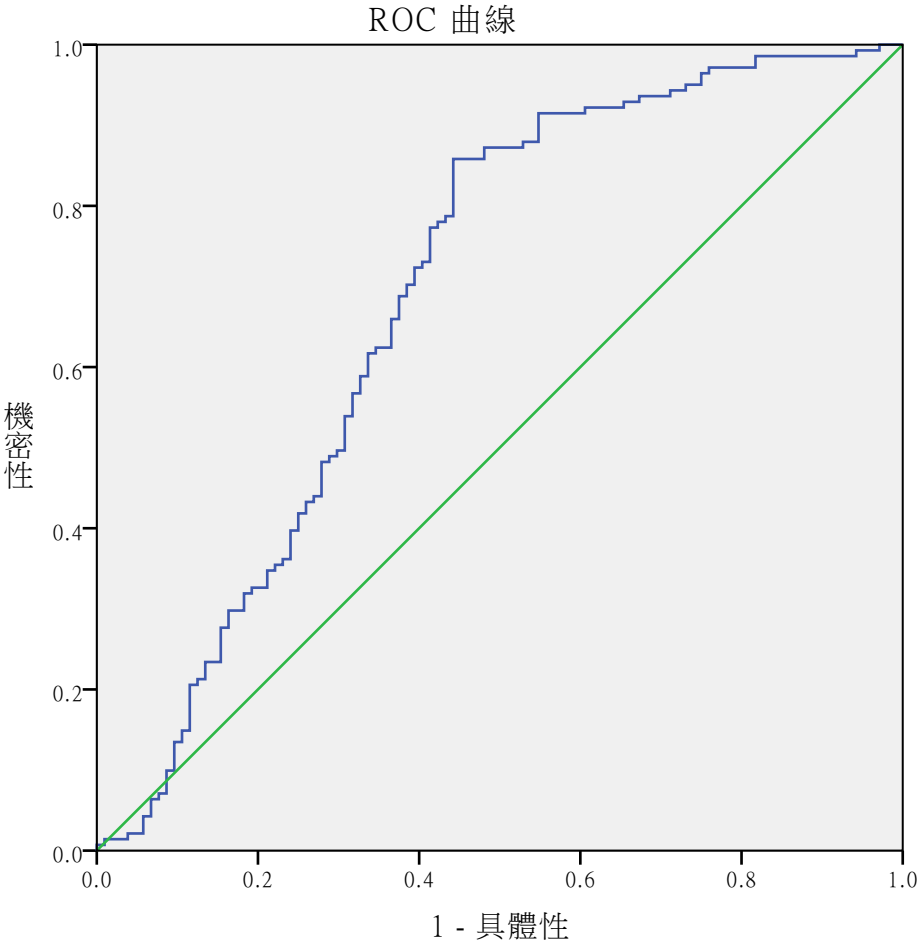

Supplement: Supplementary file 171 [file 15203375]

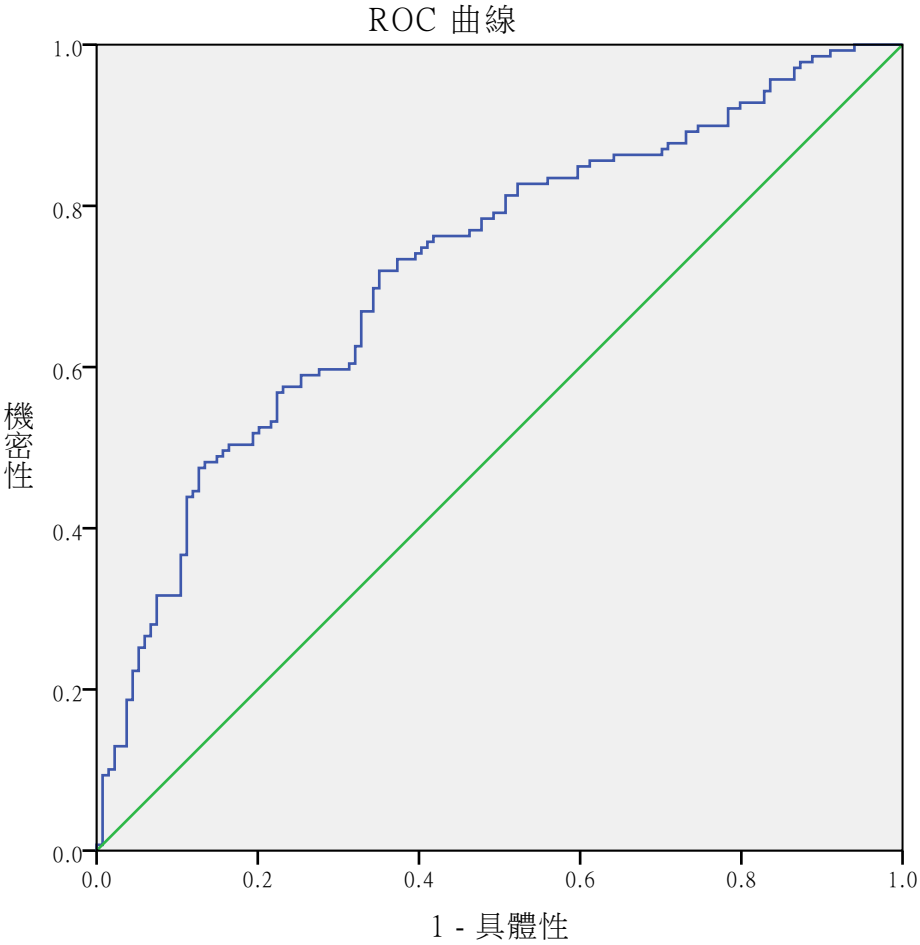

Supplement: Supplementary file 172 [file 15203375]

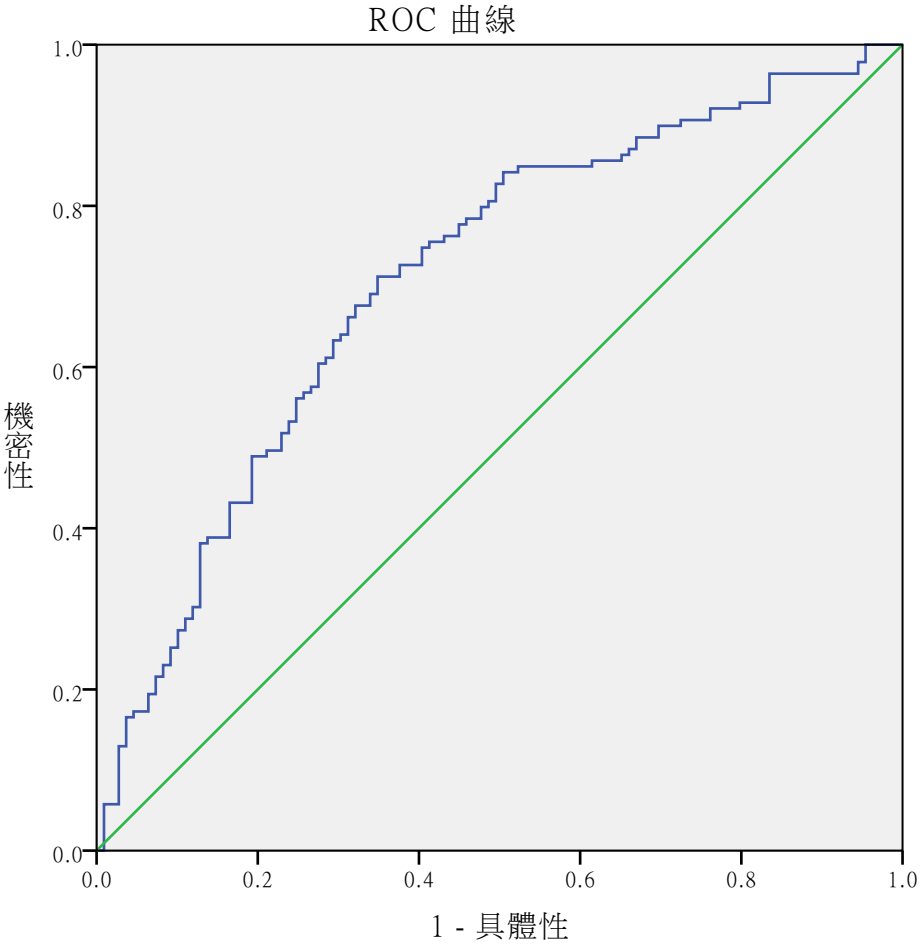

Supplement: Supplementary file 173 [file 15203375]

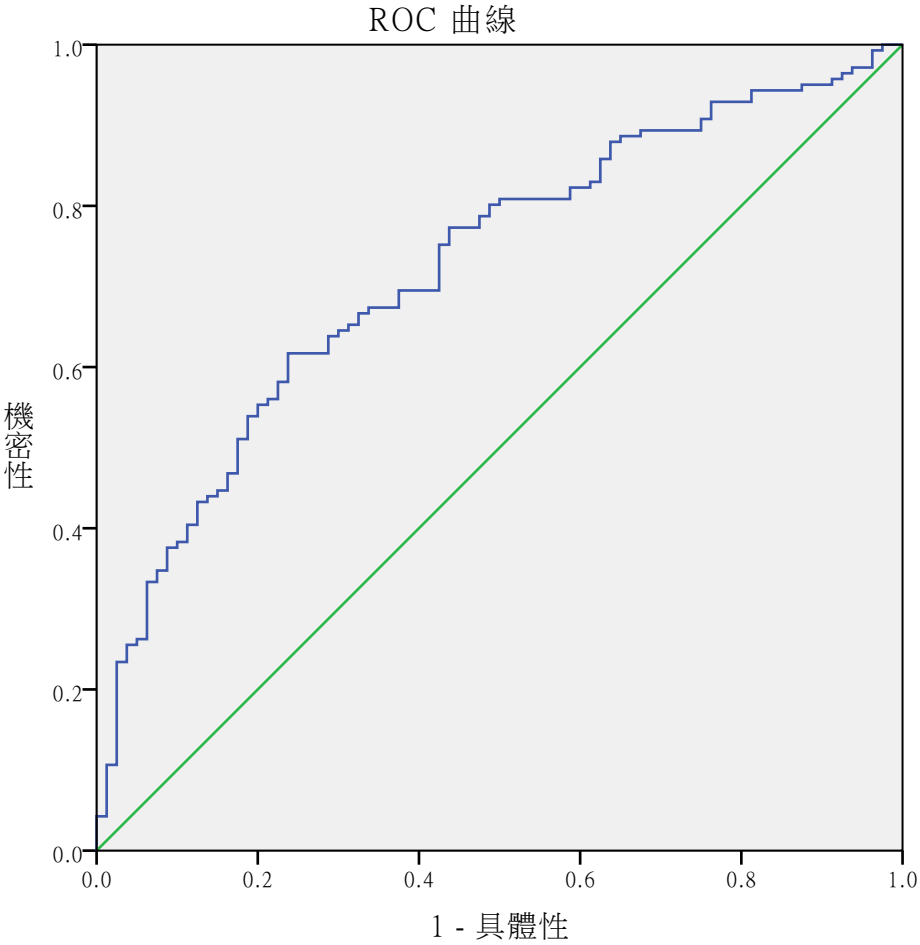

Supplement: Supplementary file 174 [file 15203375]

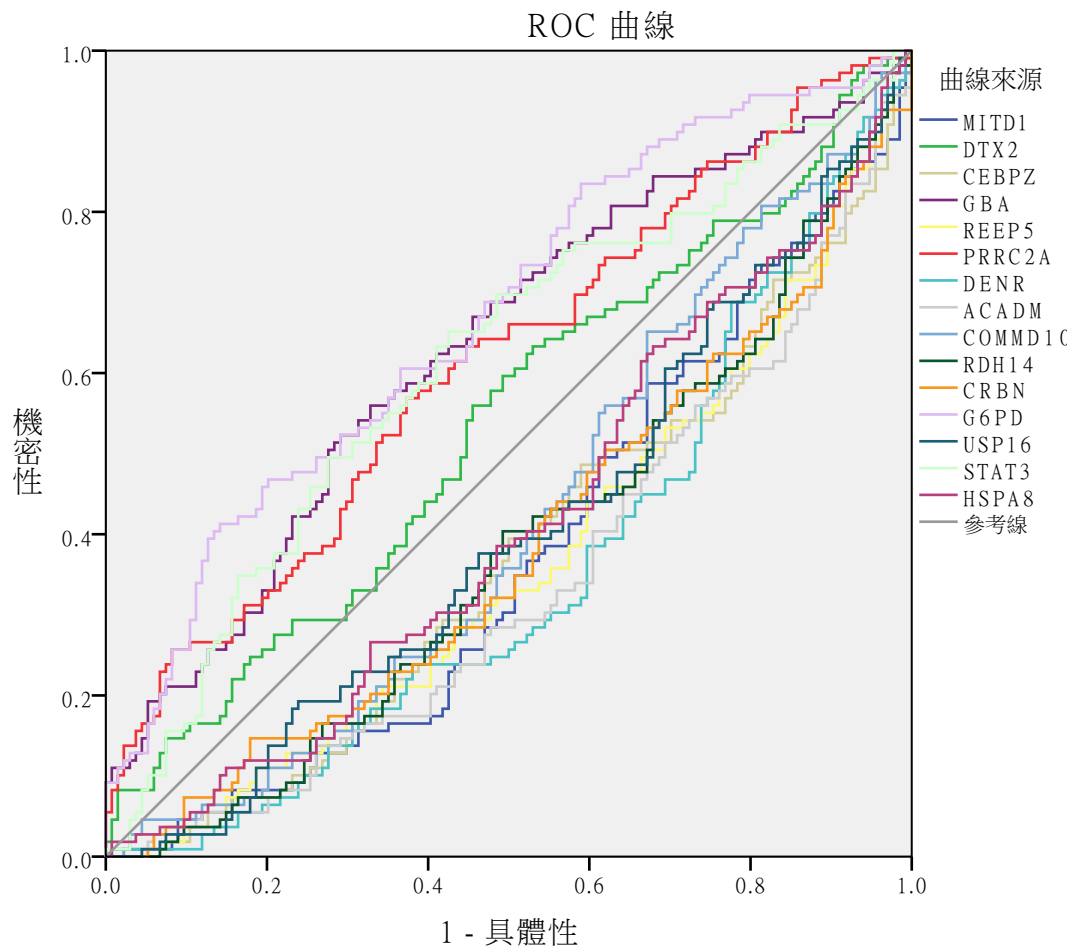

Supplement: Supplementary file 175 [file 15203375]

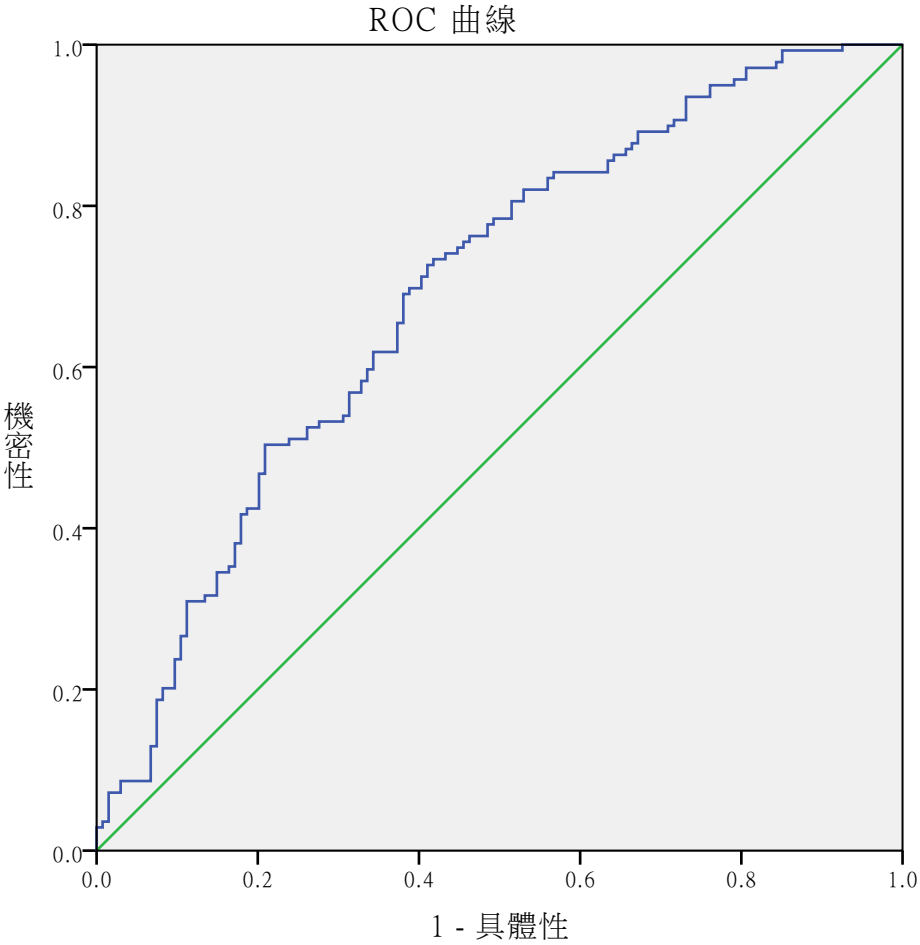

Supplement: Supplementary file 177 [file 15203375]

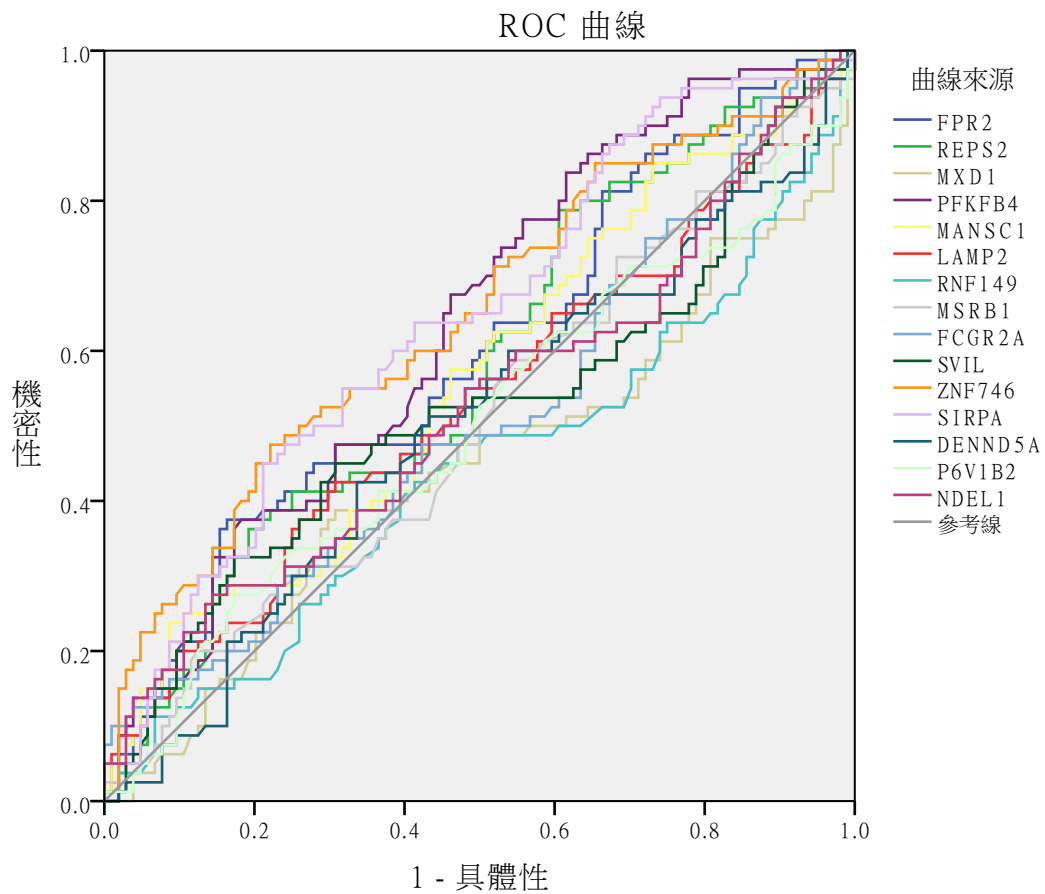

同分產生的對數區段。

Supplement: Supplementary file 178 [file 15203375]

**Module membership vs. gene significance**  
**cor=0.25, p=2.5e-18**

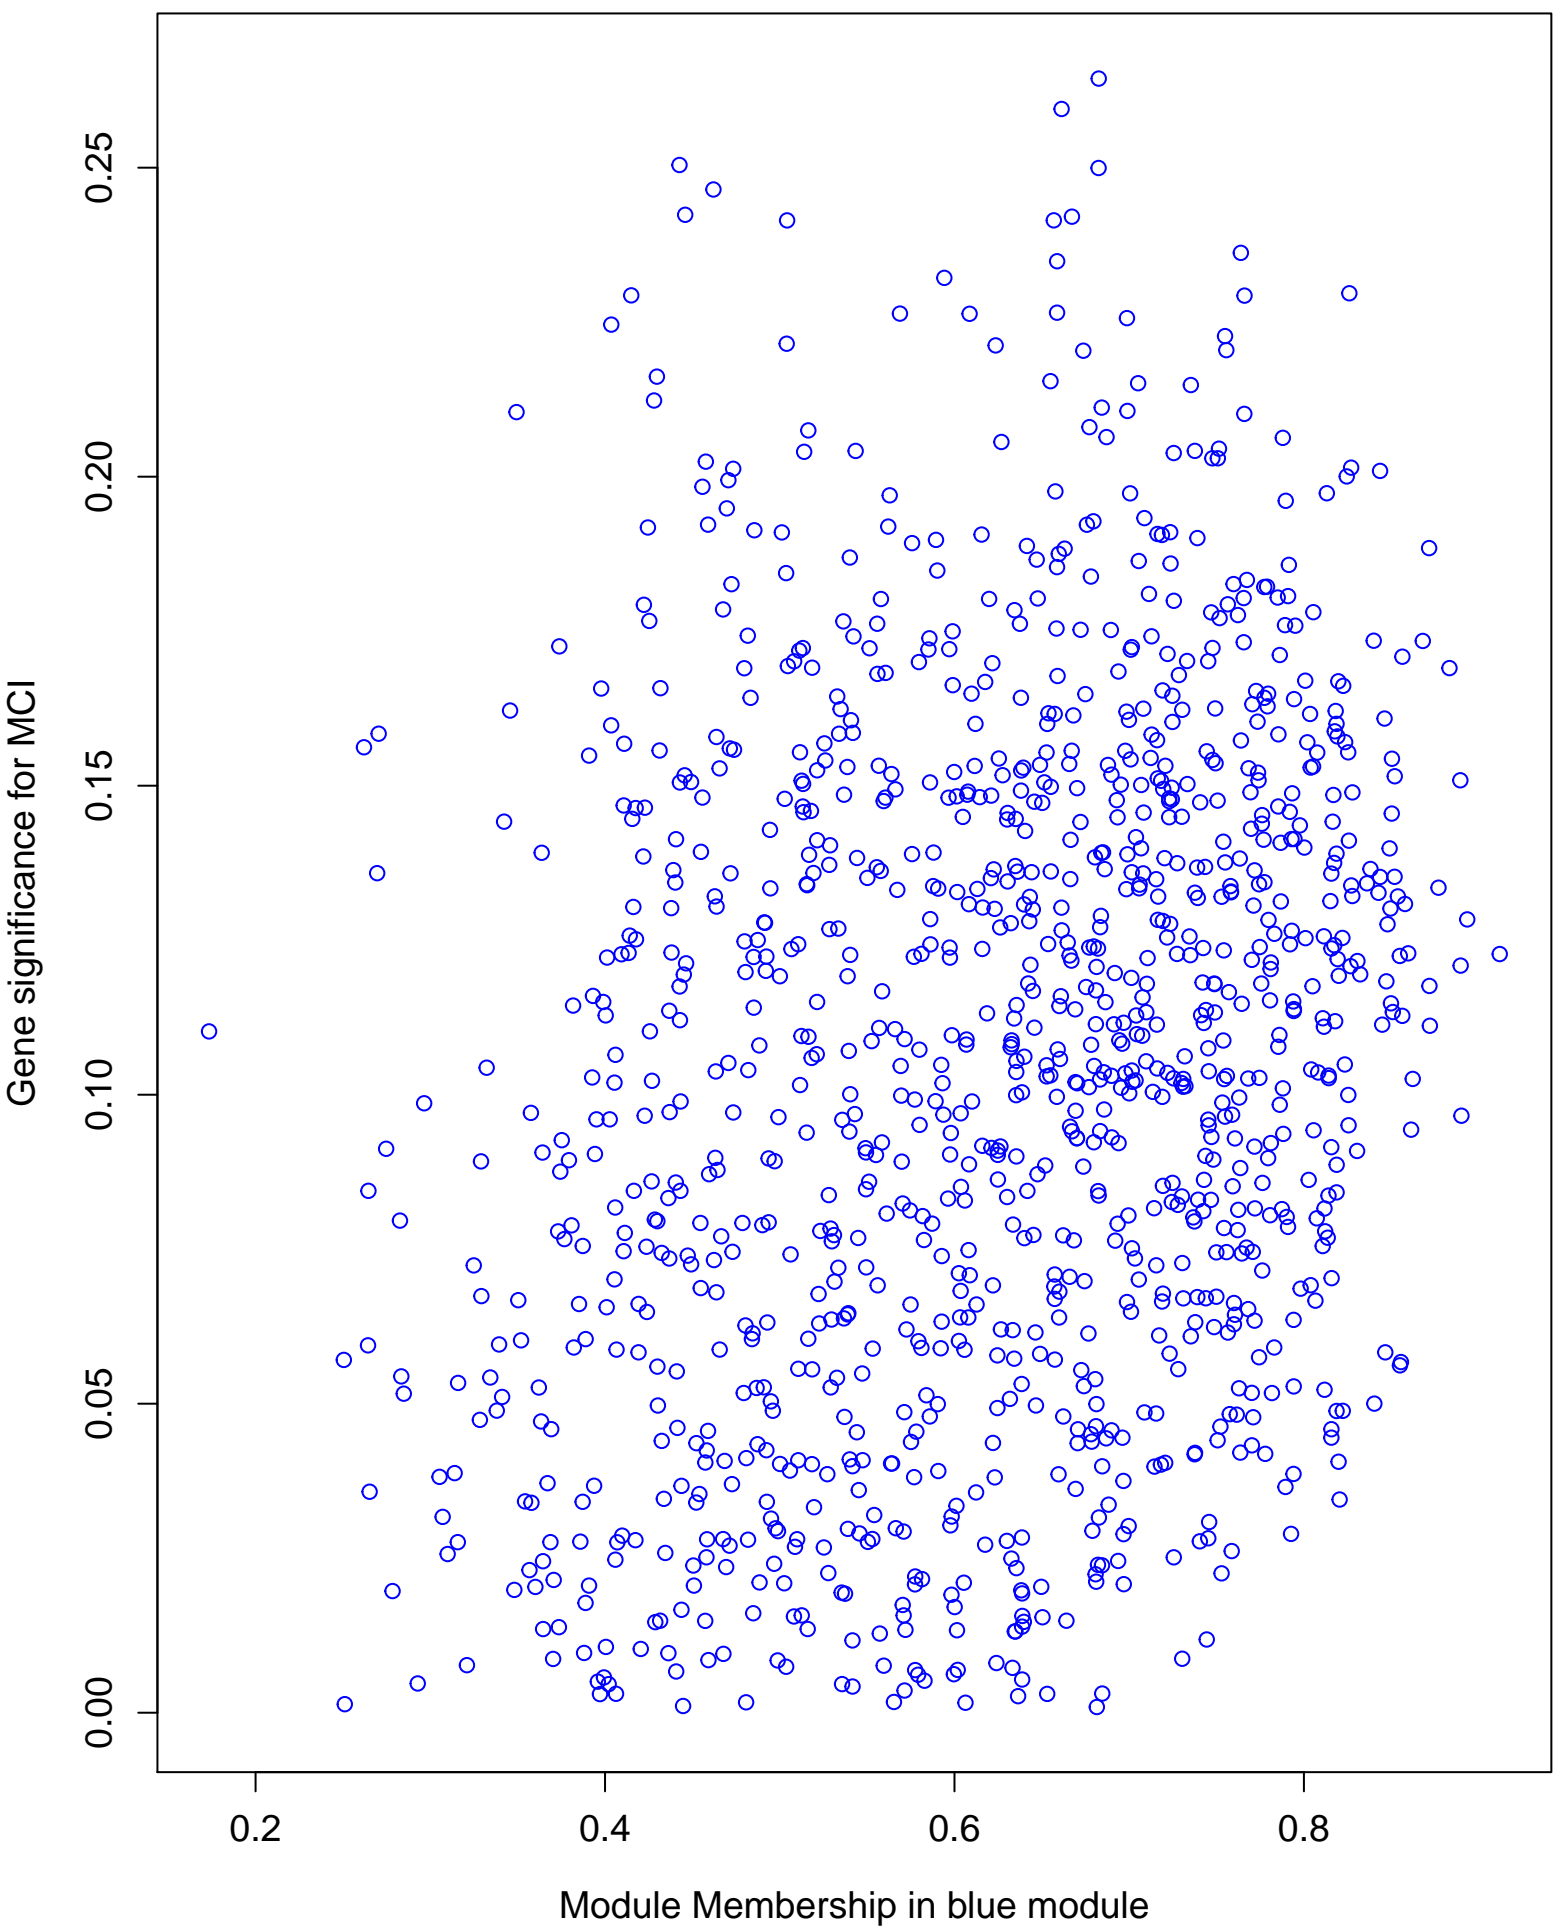

Supplement: Supplementary file 180 [file 15203375]

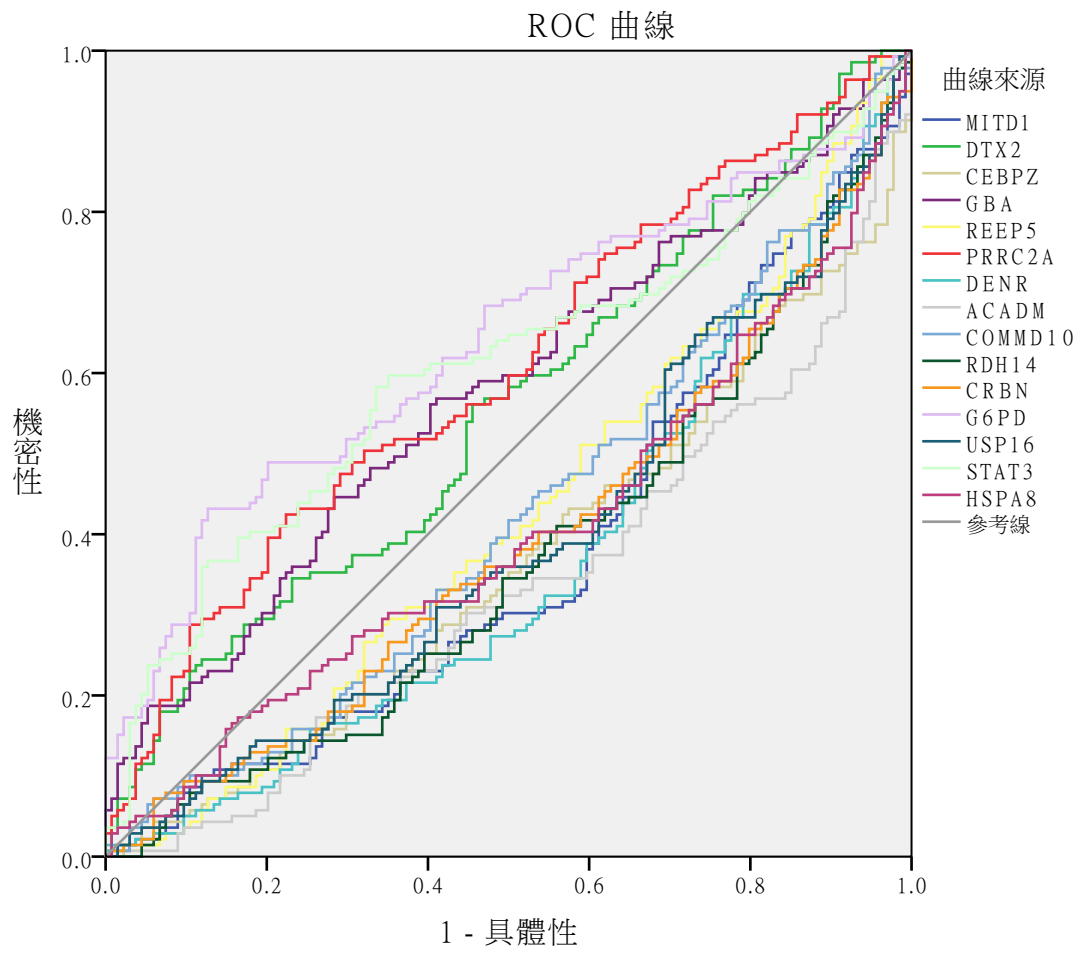

Supplement: Supplementary file 181 [file 15203375]

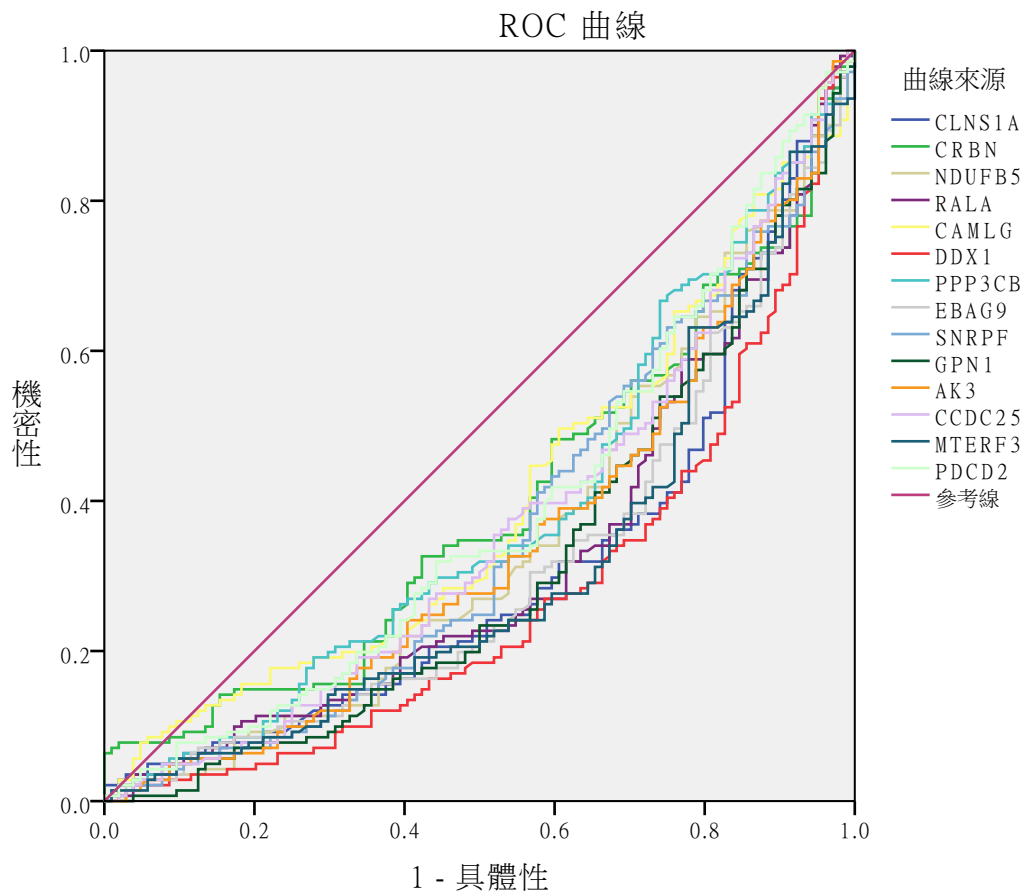

同分產生的對數區段。

Supplement: Supplementary file 182 [file 15203375]
