# Supplementary material (part 2 of 2)
Source: publisher figshare collection journal article supplement (https://frontiersin.figshare.com/ndownloader/files/15203375)

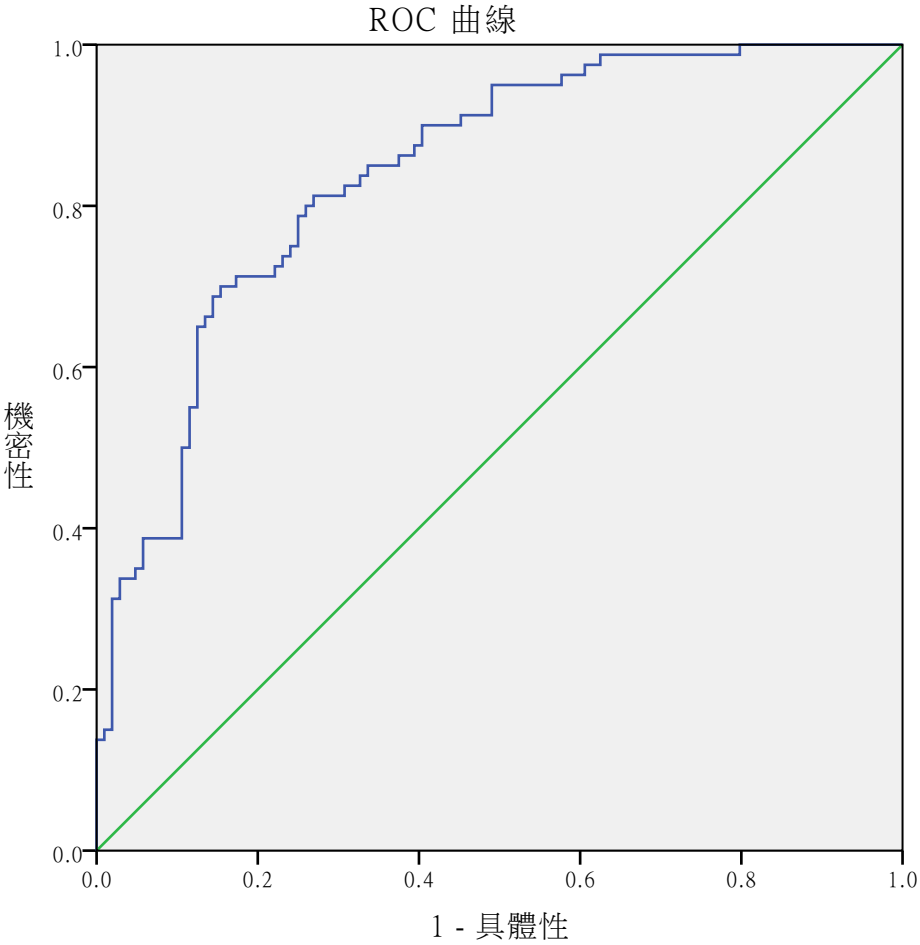

Supplement: Supplementary file 183 [file 15203375]

**Module membership vs. gene significance**  
**cor=0.46, p=6.4e-14**

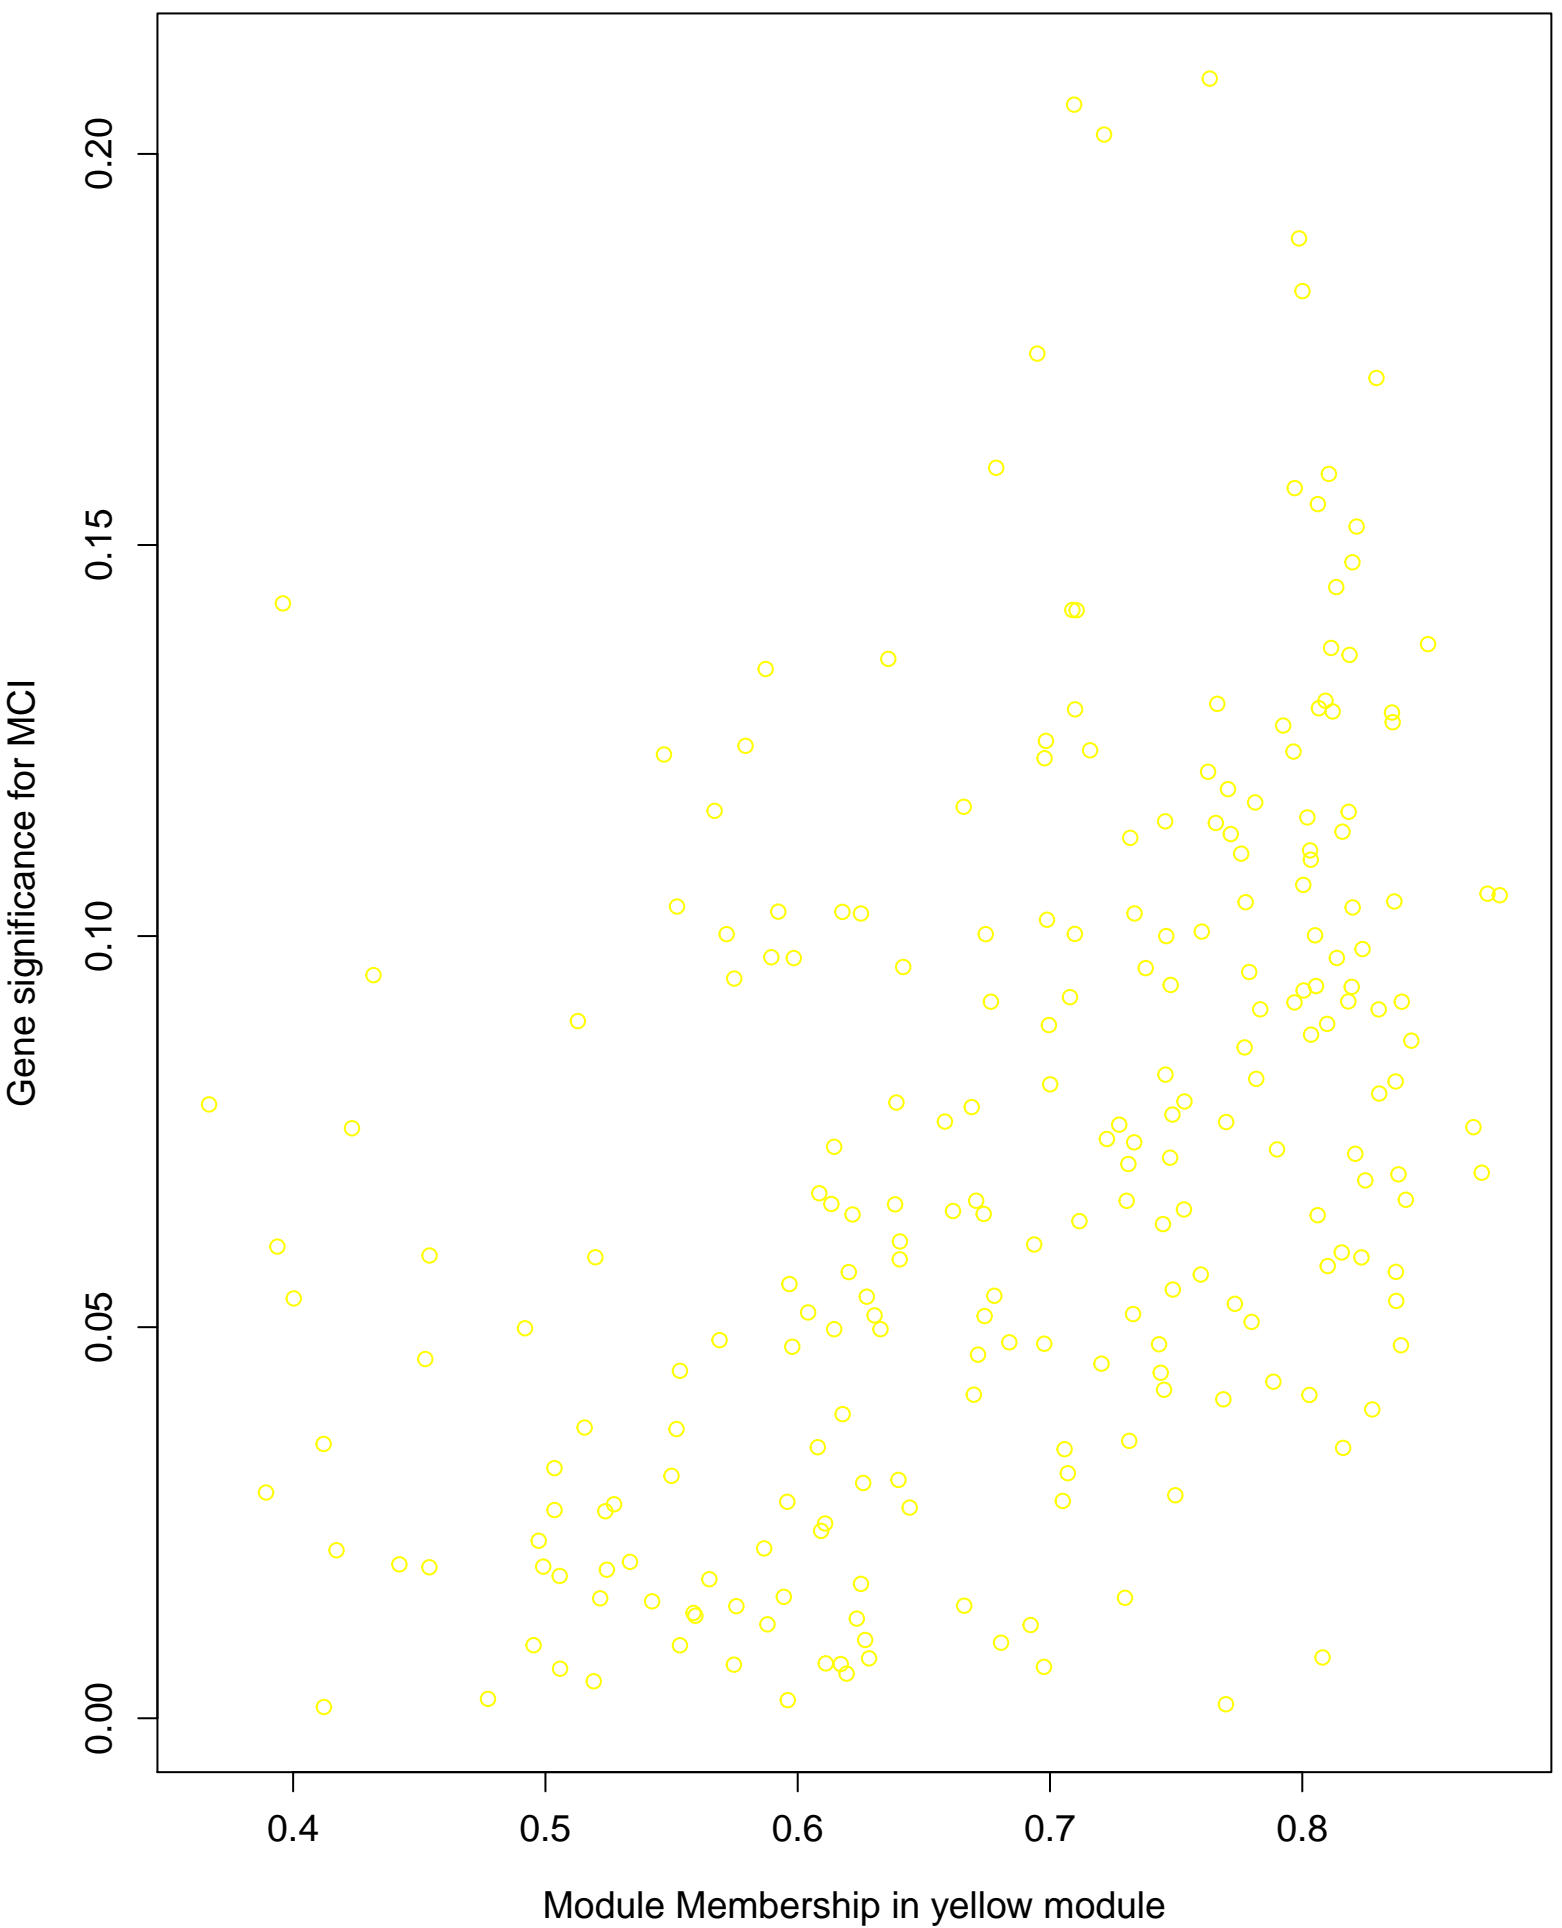

Supplement: Supplementary file 184 [file 15203375]

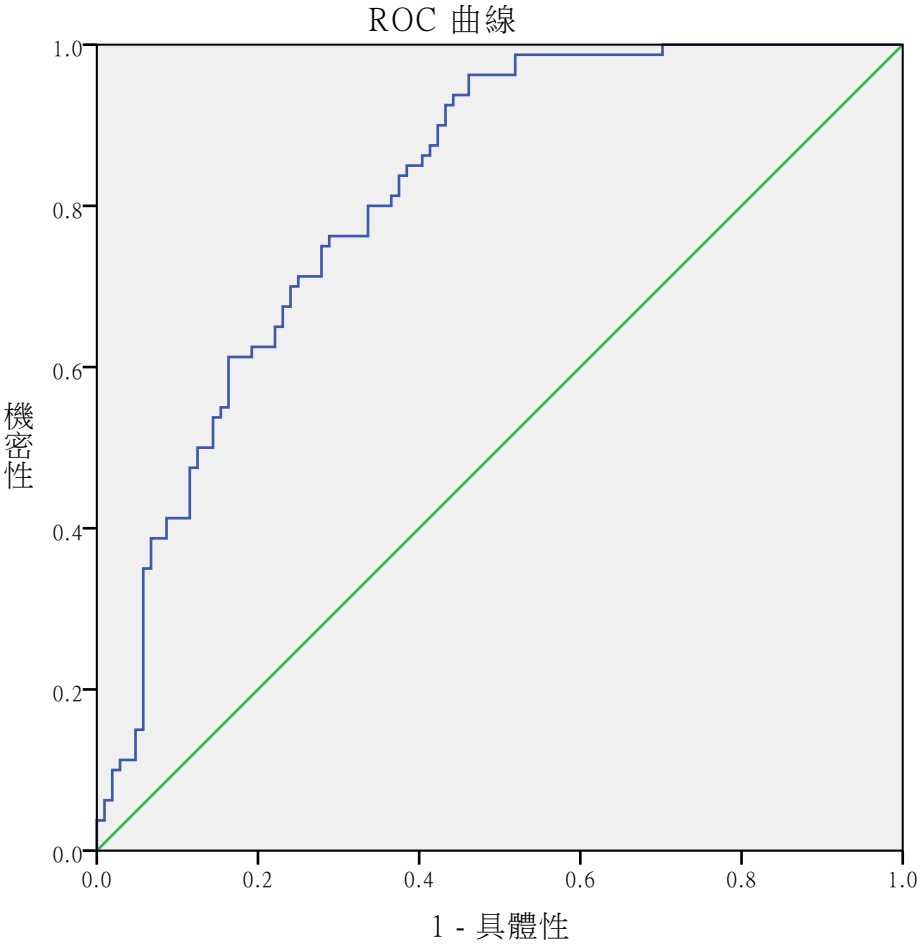

Supplement: Supplementary file 186 [file 15203375]

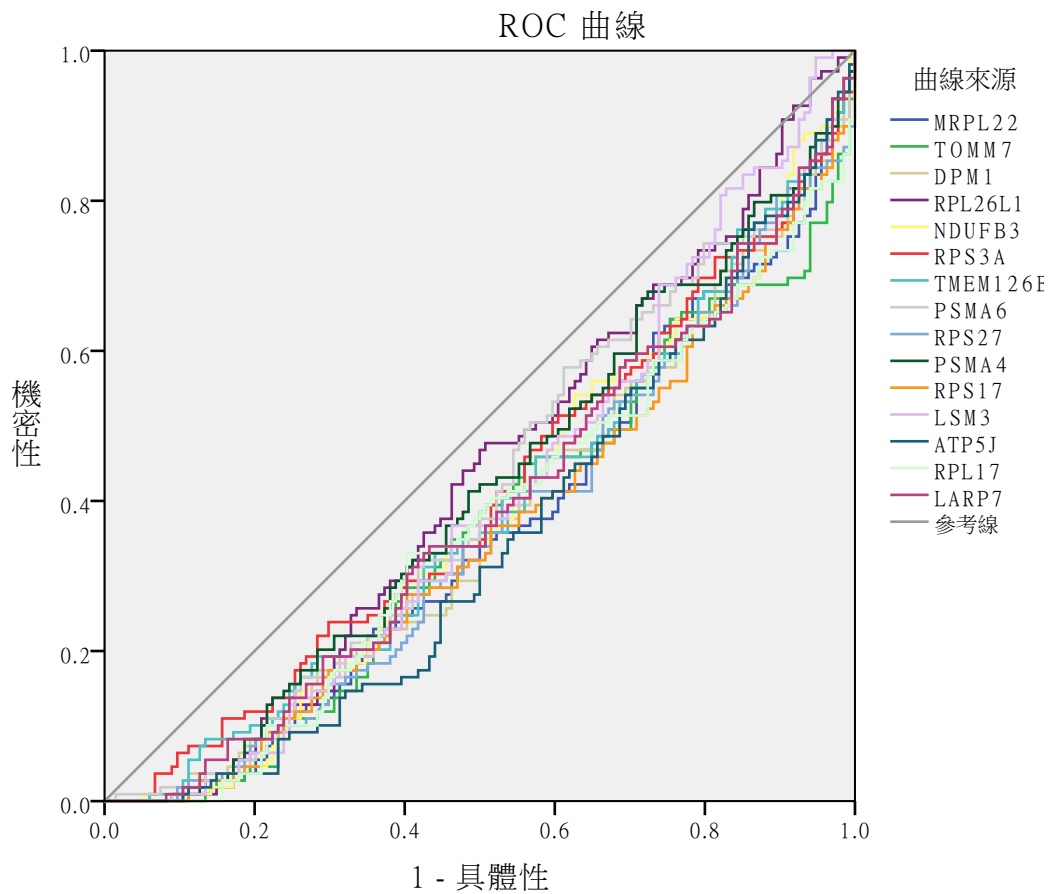

同分產生的對數區段。

Supplement: Supplementary file 187 [file 15203375]
